# Supplementary material
Source: PubMed Central journal article supplement (PMC6496959)

## Supporting Information

# Discovery of Highly Potent Pinanamine-Based Inhibitors against Amantadine- and Oseltamivir-Resistant Influenza A Viruses

Xin Zhao,<sup>\*, †, ‡, //, ○</sup> Runfeng Li,<sup>§, ○</sup> Yang Zhou,<sup>#, ○</sup> Mengjie Xiao,<sup>†, ‡, ○</sup> Chunlong Ma,<sup>//, ⊥</sup>  
Zhongjin Yang,<sup>†</sup> Shaogao Zeng,<sup>‡</sup> Qiuling Du,<sup>§</sup> Chunguang Yang,<sup>§</sup> Haiming Jiang,<sup>§</sup> Yanmei Hu,<sup>//, ⊥</sup>  
Kefeng Wang,<sup>†</sup> Chris Ka Pun Mok,<sup>§, ∇</sup> Ping Sun,<sup>†</sup> Jianghong Dong,<sup>‡</sup> Wei Cui,<sup>‡</sup> Jun Wang,<sup>//, ⊥</sup>  
Yaoquan Tu,<sup>#</sup> Zifeng Yang,<sup>\*, §</sup> and Wenhui Hu<sup>\*, †, ‡</sup>

<sup>†</sup>State Key Laboratory of Respiratory Disease, Key Laboratory of Molecular Target & Clinical Pharmacology, School of Pharmaceutical Sciences & The Fifth Affiliated Hospital, Guangzhou Medical University, Guangzhou 511436, P. R. China

<sup>‡</sup>Guangzhou Institutes of Biomedicine and Health, Chinese Academy of Sciences, Guangzhou 510530, P. R. China

<sup>§</sup>State Key Laboratory of Respiratory Disease, National Clinical Research Center for Respiratory Disease, Guangzhou Institute of Respiratory Health, The First Affiliated Hospital, Guangzhou Medical University, Guangzhou 510120, P. R. China

<sup>//</sup> Department of Pharmacology and Toxicology, College of Pharmacy, The University of Arizona, Tucson, Arizona 85721, United States

<sup>⊥</sup> BIO5 Institute, The University of Arizona, Tucson, Arizona 85721, United States

<sup>#</sup>Division of Theoretical Chemistry and Biology, School of Biotechnology, Royal Institute of Technology (KTH), AlbaNova University Center, Stockholm SE-100 44, Sweden

<sup>∇</sup>HKU-Pasteur Research Pole, School of Public Health, HKU Li Ka Shing Faculty of Medicine, The University of Hong Kong, 5 Sassoon Road, Pokfulam, Hong Kong

### Table of Contents

|                                                                        |     |
|------------------------------------------------------------------------|-----|
| 1. Supplementary Chart, Figures and Tables.....                        | S2  |
| 2. References.....                                                     | S7  |
| 3. Synthesis and characterization of intermediates.....                | S8  |
| 4. Final compounds synthesis and characterization.....                 | S9  |
| 5. <sup>1</sup> H NMR and <sup>13</sup> CNMR spectra of Compounds..... | S22 |

**Chart S1. Anti-influenza A drugs.**

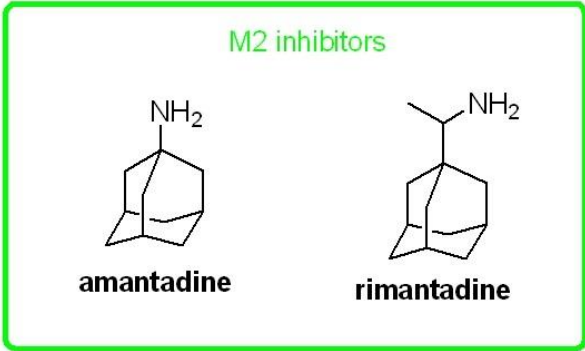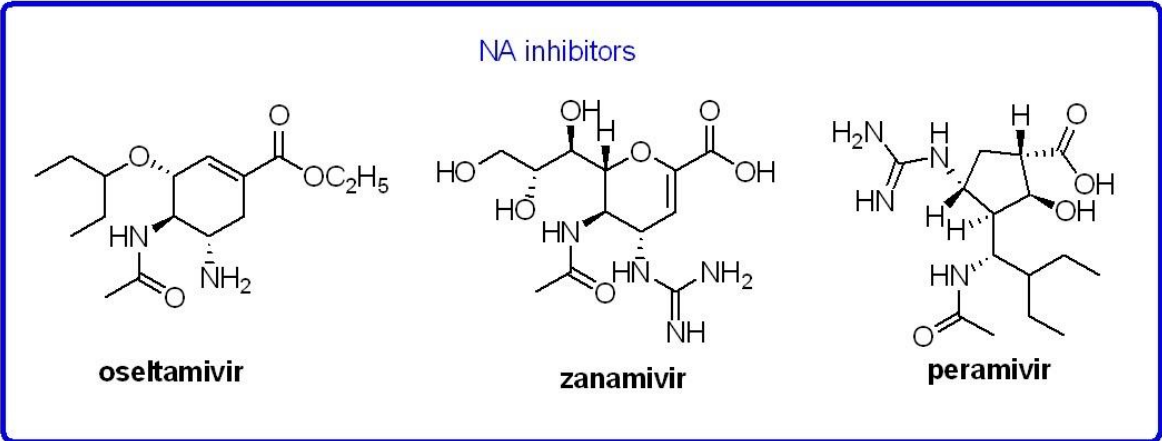

**A**

**M090  $\mu$ M**

**30**

**15**

**7.5**

**Virus**

**A/PR/8/34  
(NA-H274Y)**

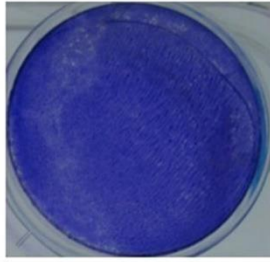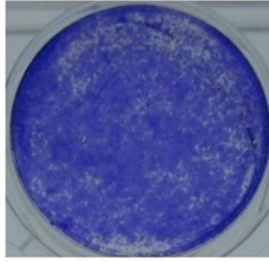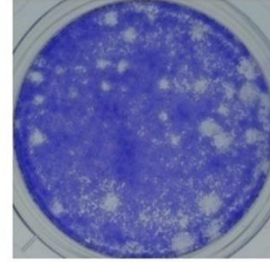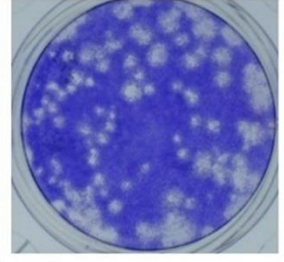

**27**

**13**

**6**

**Virus**

**A/PR/8/34**

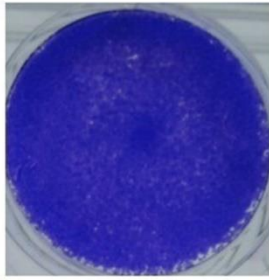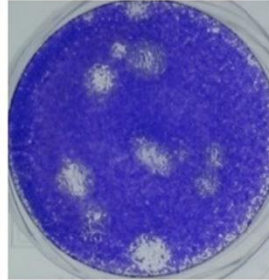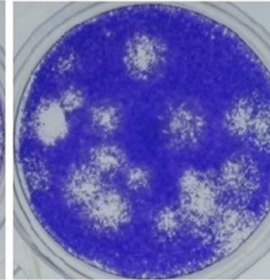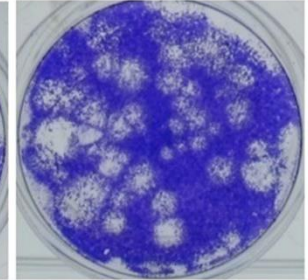

**M090  $\mu$ M**

**27**

**13**

**6**

**Virus**

**A/Hong Kong/68**

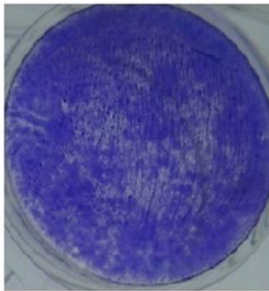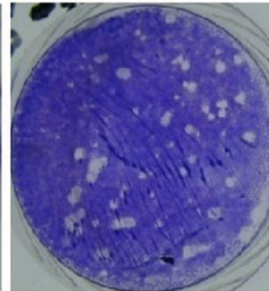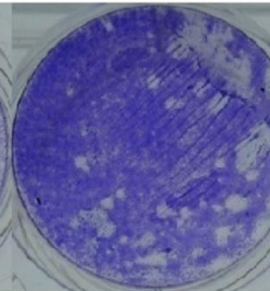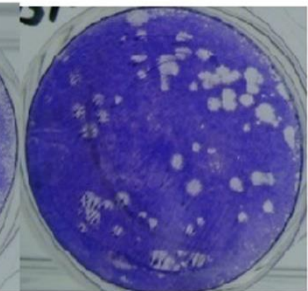

**M090  $\mu$ M**

**6**

**3**

**1.5**

**Virus**

**A/WSN/33**

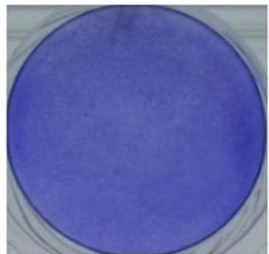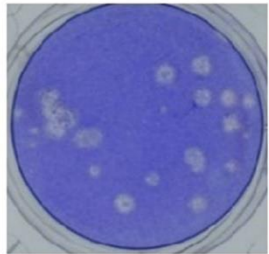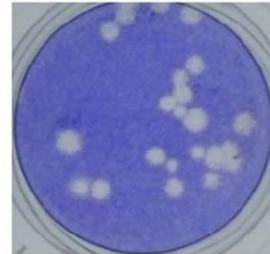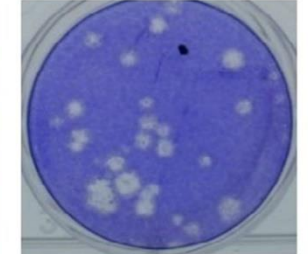

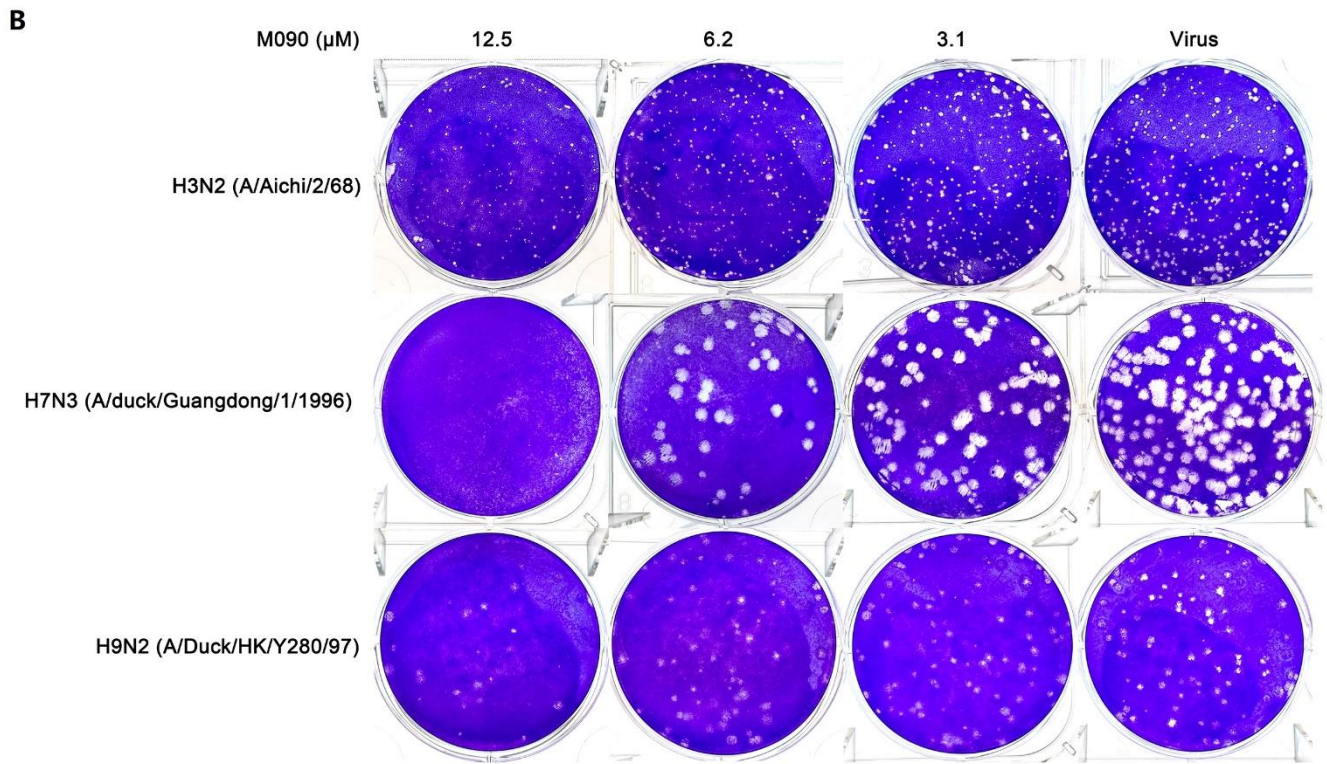

**Figure S1. The plaque reduction assay of M090.** Multiple influenza A strains were assayed for plaque formation treated with gradient concentration of **M090** on MDCK cells.

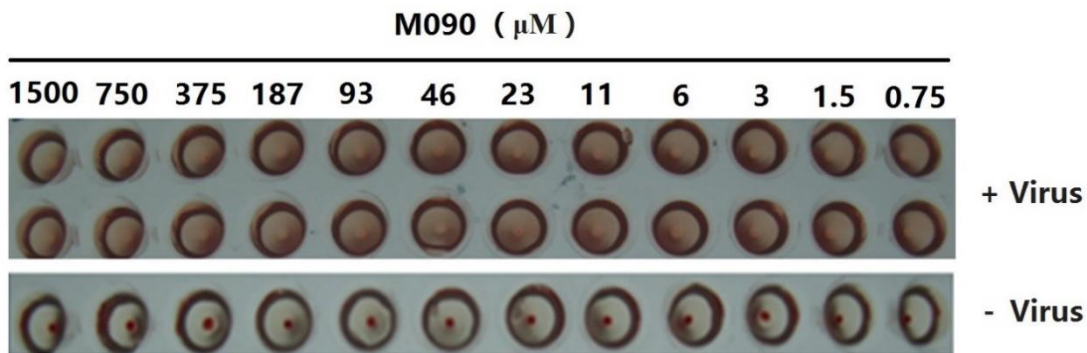

**Figure S2. Hemagglutination inhibition assay.** M090 did not inhibit the virus-induced aggregation of chicken erythrocytes of any concentrations.



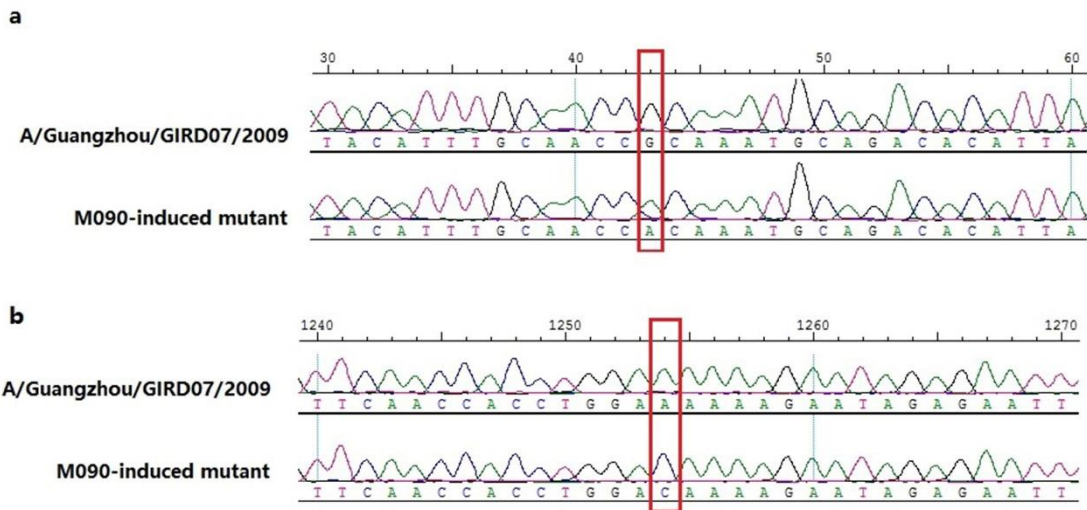

**Figure S3. Changes in basic groups of M090-induced mutant.** (a) HA segment, basic group 43 (G→A), residue 15 (A→T). (b) HA segment, basic group 1254 (A→C), residue 418 (E→D).

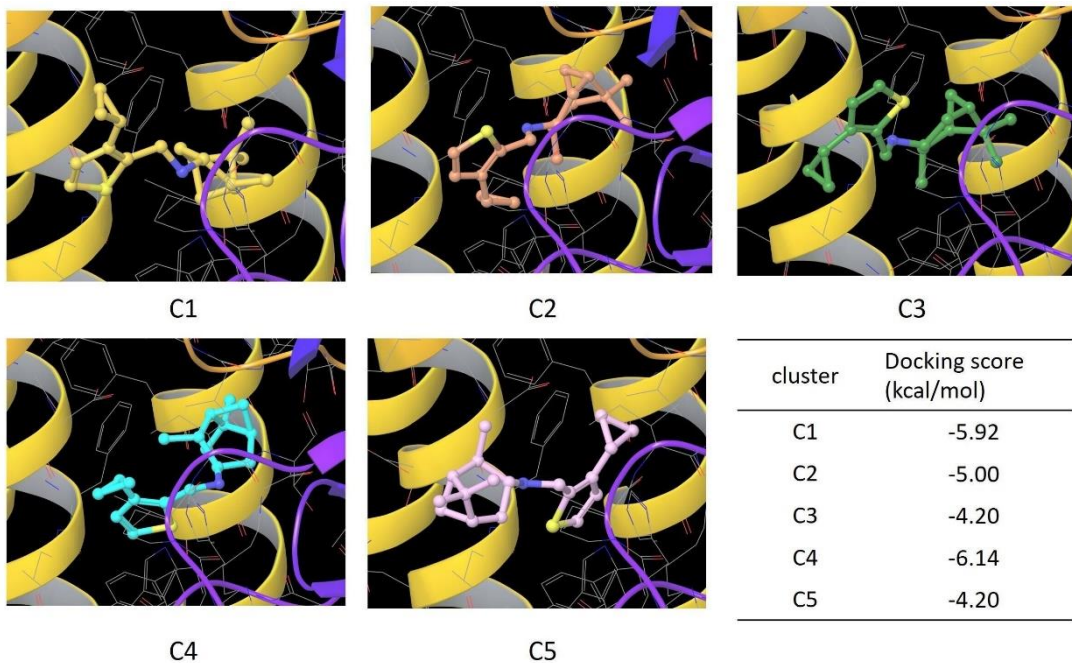

**Figure S4. Molecular docking and clusters scoring.** Conformations of M090 were docked into active sites of HA. Poses in this binding site were clustered and scored.

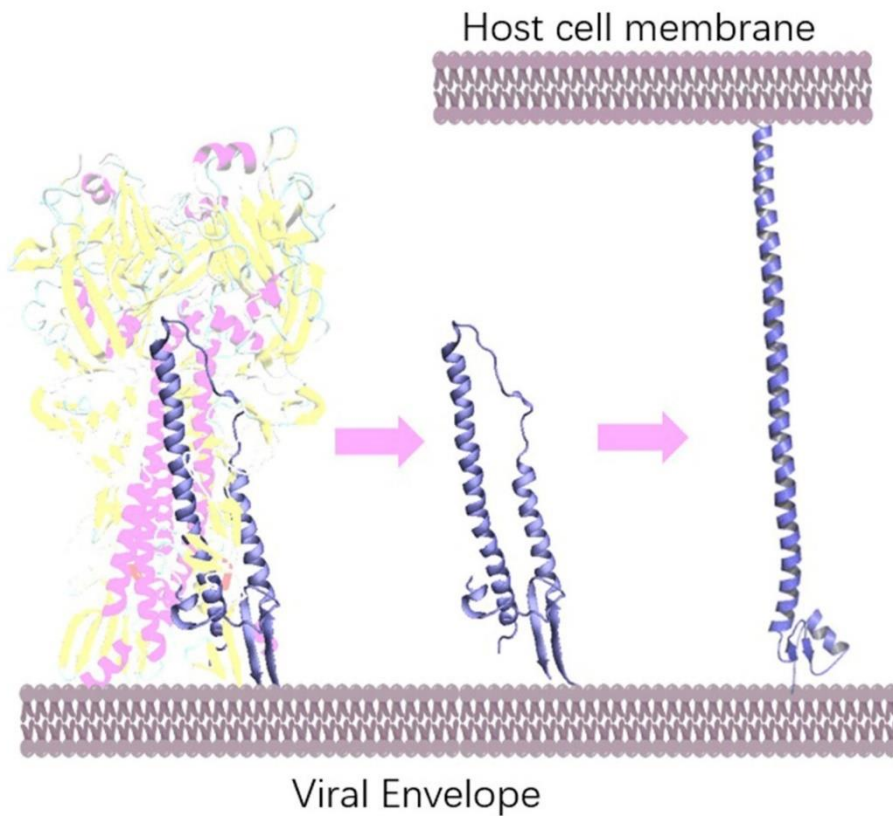

Figure S5. Conformational rearrangements of HA<sub>2</sub> monomer in membrane fusion<sup>1</sup>.

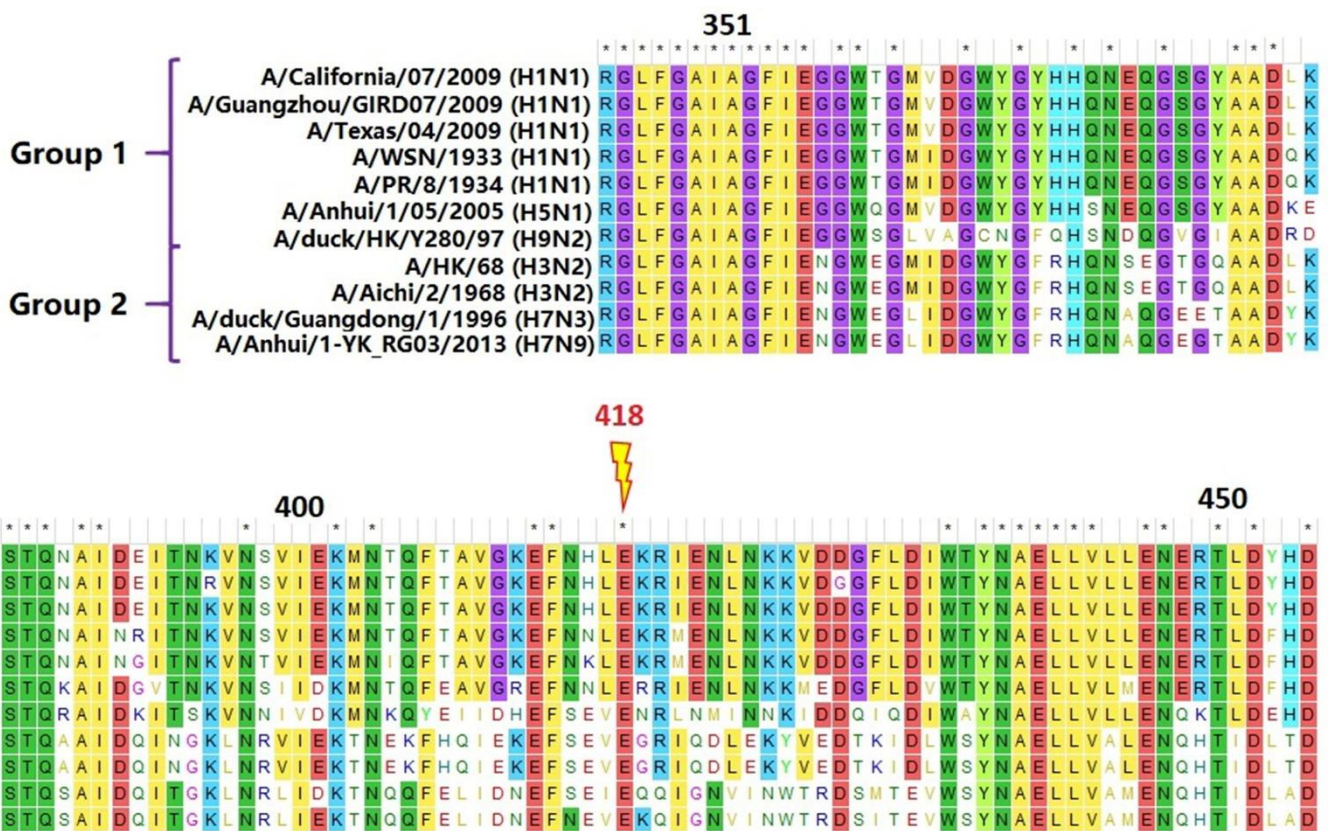

Figure S6. HA sequence analysis. HA protein sequences of influenza virus were obtained from the Influenza Research Database (<http://www.fludb.org>). Residues 350-450 of HA sequences from different strains were aligned by MEGA 7 ([www.megasoftware.net](http://www.megasoftware.net)) using the ClustalW method.

**Table S1. Inhibitory activity of compounds on M2 ion channel conductance detected by two-electrode voltage clamp (TEVC)**

| Compd.            | M2 ion channel inhibition (%) <sup>a</sup> |              |
|-------------------|--------------------------------------------|--------------|
|                   | S31N                                       | WT           |
| <b>M090</b>       | 12.97 ± 0.74                               | 2.70 ± 1.46  |
| <b>11</b>         | 11.10 ± 0.38                               | 17.57 ± 2.61 |
| <b>12</b>         | 5.25 ± 1.45                                | 13.80 ± 1.18 |
| <b>13</b>         | 3.10 ± 3.10                                | 9.10 ± 2.86  |
| <b>23</b>         | 2.60 ± 1.47                                | 15.97 ± 2.28 |
| <b>24</b>         | 7.27 ± 0.33                                | 42.23 ± 3.07 |
| <b>37</b>         | 2.55 ± 0.65                                | 38.60 ± 1.61 |
| <b>40</b>         | 0                                          | 15.30 ± 1.78 |
| <b>Amantadine</b> | 36.40 ± 2.00                               | 93.80 ± 1.21 |

<sup>a</sup> Inhibition (%) for each of the compounds were measured after 2 minutes of drug exposure at pH 5.5 and drug concentration, 100 μM.

**Table S2. Primer sequence for segments of influenza virus (A/Guangzhou/GIRD/07/2009).**

| PCR  | Forward                   | Reverse                  |
|------|---------------------------|--------------------------|
| HA-1 | ATACGACTAGCAAAAGCAGGGG    | TGCTCATTTTGATGGTGATAACCG |
| HA-2 | ATCCGATCACAATTGGAAAATGTCC | GTGTCAGTAGAAACAAGGGTGTTT |
| MP-1 | AGCAAAAGCAGGTAG           | AGTAGMAACAAGGTAGT        |

#### Reference:

- (1) Kalani, M. R., Moradi, A., Moradi, M. & Tajkhorshid, E. Characterizing a histidine switch controlling ph-dependent conformational changes of the influenza virus hemagglutinin. *Biophys. J.* **2013**, *105*, 993–1003.

### Synthesis and characterization of intermediates

|                                                                                     |                                                                                                                                                                                                                                                                                 |
|-------------------------------------------------------------------------------------|---------------------------------------------------------------------------------------------------------------------------------------------------------------------------------------------------------------------------------------------------------------------------------|
| 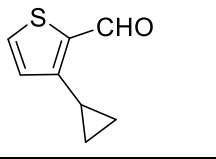   | Method D. Yield, 21%. <sup>1</sup> H NMR (400 MHz, CDCl <sub>3</sub> ) δ 10.19 (d, J = 0.8 Hz, 1H), 7.58 (d, J = 4.0 Hz, 1H), 6.63 (d, J = 5.2 Hz, 1H), 2.51–2.44 (m, 1H), 1.17–1.12 (m, 2H), 0.86–0.83 (m, 2H).                                                                |
|    | Method D. Yield, 15%. <sup>1</sup> H NMR (400 MHz, CDCl <sub>3</sub> ) δ 9.84 (d, J = 1.2 Hz, 1H), 7.49 (d, J = 1.2 Hz, 1H), 7.31 (s, 1H), 1.95–1.91 (m, 1H), 1.00–0.95 (m, 2H), 0.68–0.64 (m, 2H).                                                                             |
|    | Method D. Yield, 12%. <sup>1</sup> H NMR (400 MHz, CDCl <sub>3</sub> ) δ 9.90 (s, 1H), 7.86 (s, 1H), 7.57 (s, 1H), 6.70–6.63 (m, 1H), 5.68 (d, J = 17.6 Hz, 1H), 5.31 (d, J = 11.2 Hz, 1H).                                                                                     |
|    | Method B. Yield, 20%. <sup>1</sup> H NMR (400 MHz, CDCl <sub>3</sub> ) δ 10.04 (d, J = 0.8 Hz, 1H), 7.65 (d, J = 4.8 Hz, 1H), 7.03 (d, J = 4.8 Hz, 1H), 3.02–2.97 (q, 2H), 1.32–1.28 (t, 2H).                                                                                   |
|   | Method C. Yield, 25%. <sup>1</sup> H NMR (400 MHz, CDCl <sub>3</sub> ) δ 9.77 (s, 1H), 7.54 (s, 1H), 7.29 (s, 1H), 2.58 (q, 2H), 1.18–1.41 (t, 2H).                                                                                                                             |
|  | Method A. Yield, 16%. <sup>1</sup> H NMR (400 MHz, CDCl <sub>3</sub> ) δ: 7.24 (dd, J = 5.2, 3.2 Hz, 1H), 6.98 (dd, J = 5.2, 1.2 Hz, 1H), 6.94 (dt, J = 3.2, 1.2 Hz, 1H), 3.06 (p, J = 8.8 Hz, 1H), 2.11–2.00 (m, 2H), 1.83–1.72 (m, 2H), 1.72–1.63 (m, 2H), 1.62–1.55 (m, 2H). |
|  | Method B. Yield, 23%. <sup>1</sup> H NMR (400 MHz, CDCl <sub>3</sub> ) δ: 10.09 (s, 1H), 7.63 (d, J = 1.2 Hz, 1H), 7.09 (d, J = 1.2 Hz, 1H), 3.29–3.22 (m, 1H), 1.98–1.92 (m, 2H), 1.88–1.82 (m, 2H), 1.79–1.73 (m, 2H), 1.53–1.46 (m, 2H).                                     |

Other intermediates were used directly for next step without separation and purification.



### Final compounds synthesis and characterization.

|                                                                                                       |                                                                                                                                                                                                                                                                                                                                                                                                                                                                                                                                                                                                                                                                                                                                                                                                                            |
|-------------------------------------------------------------------------------------------------------|----------------------------------------------------------------------------------------------------------------------------------------------------------------------------------------------------------------------------------------------------------------------------------------------------------------------------------------------------------------------------------------------------------------------------------------------------------------------------------------------------------------------------------------------------------------------------------------------------------------------------------------------------------------------------------------------------------------------------------------------------------------------------------------------------------------------------|
| 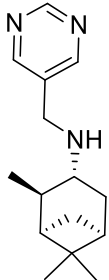 <p>Compound 1</p>   | <p>(1R,2R,3R,5S)-2,6,6-trimethyl-N-(pyrimidin-5-ylmethyl) bicyclo [3.1.1] heptan-3-amine (1. HCl). Method E. Yield, 60%. <sup>1</sup>H NMR (400 MHz, DMSO-d<sub>6</sub>) δ 9.65 (br s, 1H), 9.28 (br s, 1H), 9.21 (s, 1H), 9.06 (s, 2H), 4.27 (m, 2H), 3.49 (m, 1H), 2.40 (t, J = 12.0 Hz, 1H), 2.34 – 2.24 (m, 1H), 2.20 (m, 1H), 2.03 – 1.99 (m, 2H), 1.81 (t, J = 5.8 Hz, 1H), 1.39 (d, J = 10.0 Hz, 1H), 1.22 (s, 3H), 1.18 (d, J = 7.1 Hz, 3H), 0.93 (s, 3H). <sup>13</sup>C NMR (126 MHz, DMSO) δ 159.28, 158.74, 56.70, 47.52, 44.16, 40.78, 40.22, 38.86, 32.17, 27.68, 23.68, 21.24. HRMS: m/z (M + H<sup>+</sup>): calculated, 246.19, found, 246.19611. HPLC: gradient solvent, 10 % to 80% KH<sub>2</sub>PO<sub>4</sub> in H<sub>2</sub>O, flow rate, 1.0 mL/min, retention time 9.14 min, purity 98.39 %.</p> |
|  <p>Compound 2</p>  | <p>(1R,2R,3R,5S)-2,6,6-trimethyl-N-(pyrazin-2-ylmethyl) bicyclo [3.1.1] heptan-3-amine (2. HCl). Method E. Yield, 47%. <sup>1</sup>H NMR (400 MHz, DMSO-d<sub>6</sub>) δ 9.69 (br s, 1H), 9.32 (br s, 1H), 8.91 (s, 1H), 8.74 (s, 1H), 8.71 (s, 1H), 4.53 – 4.34 (m, 2H), 3.53 (m, 1H), 2.38 (t, J = 11.0 Hz, 1H), 2.33 – 2.14 (m, 2H), 1.97 (m, 2H), 1.85 – 1.74 (m, 1H), 1.40 (d, J = 9.9 Hz, 1H), 1.21 (s, 3H), 1.16 (d, J = 7.1 Hz, 3H), 0.90 (s, 3H). <sup>13</sup>C NMR (126 MHz, DMSO) δ 148.79, 145.80, 145.05, 144.33, 56.32, 47.49, 47.10, 40.77, 40.23, 38.85, 32.18, 31.28, 27.70, 23.67, 21.07. HRMS: m/z (M + H<sup>+</sup>): calculated, 246.19, found, 246.19626. HPLC: solvent, H<sub>2</sub>O (0.1 % HCOOH), flow rate, 0.8 mL/min, retention time 8.45 min, purity 95.08 %.</p>                         |
|  <p>Compound 3</p> | <p>(1R,2R,3R,5S)-2,6,6-trimethyl-N-((3-methyl-1H-pyrazol-4-yl)methyl) bicyclo [3.1.1] heptan-3-amine (3.2HCl). Method E. Yield, 61%. <sup>1</sup>H NMR (400 MHz, DMSO-d<sub>6</sub>) δ 9.61 (br s, 1H), 9.17 (br s, 1H), 8.01 (s, 1H), 7.63 (br s, 2H), 4.09 – 3.92 (m, 2H), 3.37 (m, 1H), 2.37 (m, 1H), 2.33 (s, 3H), 2.29 – 2.21 (m, 1H), 2.16 (m, 1H), 1.98 (m, 2H), 1.78 (t, J = 5.0 Hz, 1H), 1.47 (d, J = 9.9 Hz, 1H), 1.20 (s, 3H), 1.13 (d, J = 7.1 Hz, 3H), 0.90 (s, 3H). <sup>13</sup>C NMR (126 MHz, DMSO) δ 142.38, 136.42, 108.77, 54.90, 47.00, 40.33, 38.41, 38.11, 31.75, 30.86, 27.27, 23.20, 20.68, 9.83. HRMS: m/z (M + H<sup>+</sup>): calculated, 248.20, found, 248.21194. This compound was purified using preparative HPLC, purity 99.68 %.</p>                                                     |
|                    | <p>(1R,2R,3R,5S)-N-(furan-3-ylmethyl)-2,6,6-trimethylbicyclo [3.1.1] heptan-3-amine (4. HCl). Method E. Yield, 69%. <sup>1</sup>H NMR (400 MHz, DMSO-d<sub>6</sub>) δ 9.73 (br s, 1H), 9.30 (br s, 1H), 7.90 (s, 1H), 7.72 (s, 1H), 6.85 (s, 1H), 4.02 (m, 2H), 3.24 (m, 1H), 2.28 (m, 2H), 2.16 (m, 1H), 2.03 – 1.89 (m, 2H), 1.78 (t, J = 5.0 Hz, 1H), 1.43 (d, J = 9.6 Hz, 1H), 1.19 (s, 3H), 1.10 (d, J = 7.1 Hz, 3H), 0.85 (s, 3H). <sup>13</sup>C NMR (126 MHz, DMSO) δ</p>                                                                                                                                                                                                                                                                                                                                          |

|                                                                                                       |                                                                                                                                                                                                                                                                                                                                                                                                                                                                                                                                                                                                                                                                                                                                                                                                                                                                                                                                  |
|-------------------------------------------------------------------------------------------------------|----------------------------------------------------------------------------------------------------------------------------------------------------------------------------------------------------------------------------------------------------------------------------------------------------------------------------------------------------------------------------------------------------------------------------------------------------------------------------------------------------------------------------------------------------------------------------------------------------------------------------------------------------------------------------------------------------------------------------------------------------------------------------------------------------------------------------------------------------------------------------------------------------------------------------------|
| <p>Compound 4</p>                                                                                     | <p>143.80, 143.28, 116.27, 111.55, 54.40, 46.98, 40.27, 39.79, 38.79, 38.37, 31.80, 30.57, 27.23, 23.19, 20.59. HRMS: <math>m/z</math> (<math>M + H^+</math>): calculated, 234.18, found, 234.18500. HPLC: solvent, H<sub>2</sub>O (0.1 % HCOOH), flow rate, 0.8 mL/min, retention time 4.89 min, purity 99.83 %.</p>                                                                                                                                                                                                                                                                                                                                                                                                                                                                                                                                                                                                            |
| <p>Compound 5</p> 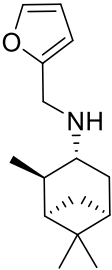   | <p>(1R,2R,3R,5S)-N-(furan-2-ylmethyl)-2,6,6-trimethylbicyclo [3.1.1] heptan-3-amine (<b>5</b>. HCl). Method E. Yield, 55%. <sup>1</sup>H NMR (400 MHz, DMSO-<i>d</i><sub>6</sub>) δ 9.79 (br s, 1H), 9.33 (br s, 1H), 7.79 (d, <i>J</i> = 1.8 Hz, 1H), 6.73 (d, <i>J</i> = 3.3 Hz, 1H), 6.54 (dd, <i>J</i> = 3.3, 1.8 Hz, 1H), 4.23 (br s, 2H), 3.26 (m, 1H), 2.29 (m, 2H), 2.13 (m, 1H), 2.03 – 1.87 (m, 2H), 1.78 (t, <i>J</i> = 4.9 Hz, 1H), 1.39 (d, <i>J</i> = 9.9 Hz, 1H), 1.19 (s, 3H), 1.09 (d, <i>J</i> = 7.1 Hz, 3H), 0.87 (s, 3H). <sup>13</sup>C NMR (101 MHz, DMSO) δ 145.73, 143.75, 112.06, 110.83, 55.06, 46.98, 40.45, 40.24, 38.18, 31.68, 30.43, 27.09, 22.93, 20.40. HRMS: <math>m/z</math> (<math>M + H^+</math>): calculated, 234.18, found, 234.18510. HPLC: solvent, H<sub>2</sub>O (0.1 % HCOOH), flow rate, 0.8 mL/min, retention time 5.00 min, purity 99.87 %.</p>                                   |
| <p>Compound 6</p>  | <p>(1R,2R,3R,5S)-2,6,6-trimethyl-N-(thiophen-3-ylmethyl) bicyclo [3.1.1] heptan-3-amine (<b>6</b>. HCl). Method E. Yield, 69%. <sup>1</sup>H NMR (400 MHz, DMSO-<i>d</i><sub>6</sub>) δ 9.80 (br s, 1H), 9.37 (br s, 1H), 7.83 (dd, <i>J</i> = 3.0, 1.2 Hz, 1H), 7.61 (dd, <i>J</i> = 5.0, 3.0 Hz, 1H), 7.46 (dd, <i>J</i> = 5.0, 1.2 Hz, 1H), 4.15 (m, 2H), 3.30 – 3.13 (m, 1H), 2.38 – 2.11 (m, 3H), 2.06 – 1.87 (m, 2H), 1.77 (t, <i>J</i> = 4.9 Hz, 1H), 1.45 (d, <i>J</i> = 9.9 Hz, 1H), 1.19 (s, 3H), 1.09 (d, <i>J</i> = 7.1 Hz, 3H), 0.83 (s, 3H). <sup>13</sup>C NMR (126 MHz, DMSO) δ 132.53, 128.96, 127.06, 126.86, 54.67, 47.00, 42.66, 40.29, 39.76, 38.41, 31.78, 30.60, 27.25, 23.18, 20.61. HRMS: <math>m/z</math> (<math>M + H^+</math>): calculated, 250.16, found, 250.16216. HPLC: solvent, H<sub>2</sub>O (0.1 % HCOOH), flow rate, 0.8 mL/min, retention time 7.09 min, purity 97.62 %.</p>               |
| <p>Compound 7</p>  | <p>(1R,2R,3R,5S)-2,6,6-trimethyl-N-(thiophen-2-ylmethyl) bicyclo [3.1.1] heptan-3-amine (<b>7</b>. HCl). Method E. Yield, 74%. <sup>1</sup>H NMR (400 MHz, DMSO-<i>d</i><sub>6</sub>) δ 9.76 (br s, 1H), 9.29 (br s, 1H), 7.64 (dd, <i>J</i> = 5.1, 1.2 Hz, 1H), 7.44 (dd, <i>J</i> = 3.5, 1.2 Hz, 1H), 7.11 (dd, <i>J</i> = 5.1, 3.5 Hz, 1H), 4.39 (m, 2H), 3.32 – 3.21 (m, 1H), 2.38 – 2.22 (m, 2H), 2.15 (m, 1H), 2.04 – 1.91 (m, 2H), 1.78 (t, <i>J</i> = 5.7 Hz, 1H), 1.40 (d, <i>J</i> = 9.8 Hz, 1H), 1.19 (s, 3H), 1.08 (d, <i>J</i> = 7.1 Hz, 3H), 0.85 (s, 3H). <sup>13</sup>C NMR (126 MHz, DMSO) δ 133.29, 131.31, 128.63, 127.74, 54.99, 47.44, 42.54, 40.76, 40.26, 38.84, 32.30, 31.05, 27.69, 23.61, 20.97. HRMS: <math>m/z</math> (<math>M + H^+</math>): calculated, 250.16, found, 250.16252. HPLC: solvent, H<sub>2</sub>O (0.1 % HCOOH), flow rate, 0.8 mL/min, retention time 7.19 min, purity 99.50 %.</p> |

|                                                                                                               |                                                                                                                                                                                                                                                                                                                                                                                                                                                                                                                                                                                                                                                                                                                                                                                                                                                                           |
|---------------------------------------------------------------------------------------------------------------|---------------------------------------------------------------------------------------------------------------------------------------------------------------------------------------------------------------------------------------------------------------------------------------------------------------------------------------------------------------------------------------------------------------------------------------------------------------------------------------------------------------------------------------------------------------------------------------------------------------------------------------------------------------------------------------------------------------------------------------------------------------------------------------------------------------------------------------------------------------------------|
| 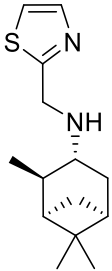 <p>Compound <b>8</b></p>    | <p>(1R,2R,3R,5S)-2,6,6-trimethyl-N-(thiazol-2-ylmethyl) bicyclo [3.1.1] heptan-3-amine (<b>8</b>. HCl). Method E. Yield, 13%. <sup>1</sup>H NMR (400 MHz, DMSO-<i>d</i><sub>6</sub>) δ 9.93 (br s, 1H), 9.53 (br s, 1H), 7.94 (d, <i>J</i> = 3.2 Hz, 1H), 7.89 (d, <i>J</i> = 3.2 Hz, 1H), 4.61 (m, 2H), 3.47 (m, 1H), 2.35 (t, <i>J</i> = 10.8 Hz, 1H), 2.31 – 2.22 (m, 1H), 2.17 (m, 1H), 1.97 (m, 2H), 1.79 (t, <i>J</i> = 5.2 Hz, 1H), 1.40 (d, <i>J</i> = 10.0 Hz, 1H), 1.20 (s, 3H), 1.12 (d, <i>J</i> = 7.1 Hz, 3H), 0.88 (s, 3H). <sup>13</sup>C NMR (126 MHz, DMSO) δ 160.36, 143.09, 123.30, 55.87, 47.53, 44.79, 40.79, 38.86, 32.24, 31.10, 27.71, 23.64, 21.00. HRMS: <i>m/z</i> (M + H<sup>+</sup>): calculated, 251.15, found, 251.15752. HPLC: solvent, H<sub>2</sub>O (0.1 % HCOOH), flow rate, 0.8 mL/min, retention time 3.18 min, purity 99.08 %.</p> |
|  <p>Compound <b>9</b></p>   | <p>(1R,2R,3R,5S)-2,6,6-trimethyl-N-(thiazol-5-ylmethyl) bicyclo [3.1.1] heptan-3-amine (<b>9</b>. HCl). Method E. Yield, 78%. <sup>1</sup>H NMR (400 MHz, DMSO-<i>d</i><sub>6</sub>) δ 9.81 (br s, 1H), 9.41 (br s, 1H), 9.17 (s, 1H), 8.15 (s, 1H), 4.50 (t, <i>J</i> = 5.4 Hz, 2H), 3.41 – 3.25 (m, 1H), 2.40 – 2.21 (m, 2H), 2.21 – 2.11 (m, 1H), 2.05 – 1.90 (m, 2H), 1.79 (t, <i>J</i> = 5.2 Hz, 1H), 1.40 (d, <i>J</i> = 9.8 Hz, 1H), 1.20 (s, 3H), 1.12 (d, <i>J</i> = 7.1 Hz, 3H), 0.87 (s, 3H). <sup>13</sup>C NMR (126 MHz, DMSO) δ 157.09, 146.49, 128.80, 55.56, 47.46, 40.74, 40.24, 38.83, 32.25, 31.12, 27.67, 23.64, 21.06. HRMS: <i>m/z</i> (M + H<sup>+</sup>): calculated, 251.15, found, 251.15733. HPLC: solvent, H<sub>2</sub>O (0.1 % HCOOH), flow rate, 0.8 mL/min, retention time 2.51 min, purity 95.21 %.</p>                                  |
|  <p>Compound <b>10</b></p> | <p>(1R,2R,3R,5S)-2,6,6-trimethyl-N-((4-methylthiazol-2-yl)methyl) bicyclo [3.1.1] heptan-3-amine (<b>10</b>. HCl). Method E. Yield, 62%. <sup>1</sup>H NMR (400 MHz, DMSO-<i>d</i><sub>6</sub>) δ 9.89 (br s, 1H), 9.49 (br s, 1H), 7.42 (s, 1H), 4.54 (m, 2H), 3.47 (m, 1H), 2.41 (s, 3H), 2.34 (m, 1H), 2.30 – 2.22 (m, 1H), 2.16 (m, 1H), 1.98-1.93 (m, 2H), 1.84 – 1.73 (m, 1H), 1.39 (d, <i>J</i> = 9.9 Hz, 1H), 1.20 (s, 3H), 1.12 (d, <i>J</i> = 7.1 Hz, 3H), 0.88 (s, 3H). <sup>13</sup>C NMR (126 MHz, DMSO) δ 159.70, 152.49, 117.55, 55.87, 47.52, 44.87, 40.80, 40.23, 38.92, 32.24, 31.09, 27.76, 23.68, 21.04, 16.99. HRMS: <i>m/z</i> (M + H<sup>+</sup>): calculated, 265.17, found, 265.17349. HPLC: solvent, H<sub>2</sub>O (0.1 % HCOOH), flow rate, 0.8 mL/min, retention time 4.92 min, purity 98.79 %.</p>                                          |
|  <p>Compound <b>11</b></p> | <p>(1R,2R,3R,5S)-2,6,6-trimethyl-N-((3-methylthiophen-2-yl)methyl) bicyclo [3.1.1] heptan-3-amine (<b>11</b>. HCl). Method E. Yield, 41%. <sup>1</sup>H NMR (400 MHz, DMSO-<i>d</i><sub>6</sub>) δ 9.77 (br s, 1H), 9.17 (br s, 1H), 7.56 (d, <i>J</i> = 5.1 Hz, 1H), 6.95 (d, <i>J</i> = 5.1 Hz, 1H), 4.29 (br t, <i>J</i> = 5.4 Hz, 2H), 3.50 – 3.36 (m, 1H), 2.36 (m, 1H), 2.29 (s, 3H), 2.25 (m, 1H), 2.18 (m, 1H), 2.05-1.94 (m, 2H), 1.78 (td, <i>J</i> = 5.8, 1.9 Hz, 1H), 1.46 (d, <i>J</i> = 9.8 Hz, 1H), 1.20 (s, 3H), 1.11 (d, <i>J</i> = 7.1 Hz, 3H), 0.89 (s, 3H). <sup>13</sup>C NMR (126 MHz,</p>                                                                                                                                                                                                                                                          |

|                                                                                                               |                                                                                                                                                                                                                                                                                                                                                                                                                                                                                                                                                                                                                                                                                                                                                                                                                                                                                                                                                                                               |
|---------------------------------------------------------------------------------------------------------------|-----------------------------------------------------------------------------------------------------------------------------------------------------------------------------------------------------------------------------------------------------------------------------------------------------------------------------------------------------------------------------------------------------------------------------------------------------------------------------------------------------------------------------------------------------------------------------------------------------------------------------------------------------------------------------------------------------------------------------------------------------------------------------------------------------------------------------------------------------------------------------------------------------------------------------------------------------------------------------------------------|
|                                                                                                               | DMSO) $\delta$ 139.07, 130.00, 126.72, 126.49, 55.13, 46.99, 40.60, 40.36, 39.83, 38.42, 31.73, 30.72, 27.26, 23.16, 20.61, 13.81. HRMS: $m/z$ ( $M + H^+$ ): calculated, 264.17, found, 264.17807. HPLC: solvent, H <sub>2</sub> O (0.1 % HCOOH), flow rate, 0.8 mL/min, retention time 5.76 min, purity 99.87 %.                                                                                                                                                                                                                                                                                                                                                                                                                                                                                                                                                                                                                                                                            |
| 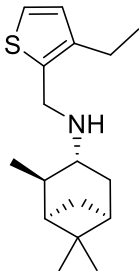 <p>Compound <b>12</b></p>   | (1R,2R,3R,5S)-N-((3-ethylthiophen-2-yl) methyl) -2,6,6-trimethyl bicyclo [3.1.1] heptan-3-amine ( <b>12</b> . HCl). Method B, then Method E. Yield, 12%. <sup>1</sup> H NMR (400 MHz, DMSO- <i>d</i> <sub>6</sub> ) $\delta$ 9.66 (br s, 1H), 9.08 (br s, 1H), 7.59 (d, $J = 5.2$ Hz, 1H), 7.03 (d, $J = 5.2$ Hz, 1H), 4.44 – 4.17 (m, 2H), 3.42 (m, 1H), 2.66 (q, $J = 7.5$ Hz, 2H), 2.41 – 2.31 (m, 1H), 2.26 (m, 1H), 2.14 (m, 1H), 2.05 – 1.91 (m, 2H), 1.78 (td, $J = 5.8, 1.9$ Hz, 1H), 1.43 (d, $J = 9.9$ Hz, 1H), 1.20 (s, 3H), 1.17 (t, $J = 7.6$ Hz, 3H), 1.11 (d, $J = 7.1$ Hz, 3H), 0.89 (s, 3H). <sup>13</sup> C NMR (126 MHz, DMSO) $\delta$ 145.34, 128.23, 127.08, 125.94, 55.15, 46.96, 40.43, 40.35, 39.88 (overlap with DMSO peak, 38.40, 31.76, 30.69, 27.25, 23.14, 20.93, 20.56, 14.98. HRMS: $m/z$ ( $M + H^+$ ): calculated, 278.19, found, 278.19382. HPLC: solvent, H <sub>2</sub> O (0.1 % HCOOH), flow rate, 0.8 mL/min, retention time 6.16 min, purity 97.44 %. |
|  <p>Compound <b>13</b></p> | (1R,2R,3R,5S)-N-((3-bromothiophen-2-yl) methyl) -2,6,6-trimethyl bicyclo [3.1.1] heptan-3-amine ( <b>13</b> . HCl). Method E. Yield, 86%. <sup>1</sup> H NMR (400 MHz, DMSO- <i>d</i> <sub>6</sub> ) $\delta$ 9.77 (br s, 1H), 9.35 (br s, 1H), 7.84 (d, $J = 5.4$ Hz, 1H), 7.19 (d, $J = 5.3$ Hz, 1H), 4.35 (br s, 2H), 3.38 (br s, 1H), 2.44 (t, $J = 11.7$ Hz, 1H), 2.28 (m, 1H), 2.12 (m, 1H), 2.06 – 1.93 (m, 2H), 1.80 (td, $J = 5.7, 2.0$ Hz, 1H), 1.35 (d, $J = 9.9$ Hz, 1H), 1.20 (s, 3H), 1.13 (d, $J = 7.1$ Hz, 3H), 0.90 (s, 3H). <sup>13</sup> C NMR (126 MHz, DMSO) $\delta$ 130.00, 129.47, 128.43, 113.93, 55.02, 46.88, 41.71, 40.35, 40.00, 38.38, 31.77, 30.66, 27.22, 23.16, 20.55. HRMS: $m/z$ ( $M + H^+$ ): calculated, 328.07, found, 328.07306. HPLC: solvent, H <sub>2</sub> O (0.1 % HCOOH), flow rate, 0.8 mL/min, retention time 5.87 min, purity 99.87 %.                                                                                                       |
|  <p>Compound <b>14</b></p> | (1R,2R,3R,5S)-2,6,6-trimethyl-N-( (3-propylthiophen-2-yl) methyl) bicyclo [3.1.1] heptan-3-amine ( <b>14</b> . HCl). Method B, then Method E. Yield, 15%. <sup>1</sup> H NMR (500 MHz, DMSO- <i>d</i> <sub>6</sub> ) $\delta$ 9.56 (br s, 1H), 9.02 (br s, 1H), 7.58 (d, $J = 5.2$ Hz, 1H), 7.01 (d, $J = 5.2$ Hz, 1H), 4.32 (m, 2H), 3.48 – 3.38 (m, 1H), 2.61 (dd, $J = 8.7, 6.7$ Hz, 2H), 2.41 – 2.31 (m, 1H), 2.27 (m, 1H), 2.13 (m, 1H), 2.05 – 1.91 (m, 2H), 1.79 (m, 1H), 1.64 – 1.51 (m, 2H), 1.40 (d, $J = 9.9$ Hz, 1H), 1.20 (s, 3H), 1.11 (d, $J = 7.0$ Hz, 3H), 0.92 (t, $J = 7.4$ Hz, 3H), 0.89 (s, 3H). <sup>13</sup> C NMR (126 MHz, DMSO) $\delta$ 144.23, 129.13, 127.38, 126.91, 55.56, 47.44, 40.95, 40.84, 40.38, 38.86, 32.24, 31.12, 30.11, 27.71, 23.85, 23.61, 21.02,                                                                                                                                                                                                 |



|                                                                                                               |                                                                                                                                                                                                                                                                                                                                                                                                                                                                                                                                                                                                                                                                                                                                                                                                                                                                                                                                                        |
|---------------------------------------------------------------------------------------------------------------|--------------------------------------------------------------------------------------------------------------------------------------------------------------------------------------------------------------------------------------------------------------------------------------------------------------------------------------------------------------------------------------------------------------------------------------------------------------------------------------------------------------------------------------------------------------------------------------------------------------------------------------------------------------------------------------------------------------------------------------------------------------------------------------------------------------------------------------------------------------------------------------------------------------------------------------------------------|
|                                                                                                               | 14.18. HRMS: $m/z$ ( $M + H^+$ ): calculated, 292.20, found, 292.20941. HPLC: gradient solvent, 10 % to 100 % TFA in $H_2O$ , flow rate, 1.0 mL/min, retention time 13.04 min, purity 100 %.                                                                                                                                                                                                                                                                                                                                                                                                                                                                                                                                                                                                                                                                                                                                                           |
| 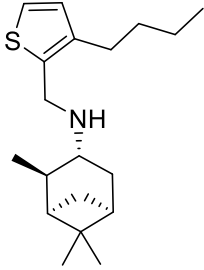 <p>Compound <b>15</b></p>   | (1R,2R,3R,5S)-N-((3-butylthiophen-2-yl)methyl)-2,6,6-trimethylbicyclo [3.1.1] heptan-3-amine ( <b>15</b> . HCl). Method B, then Method E. Yield, 22%. $^1H$ NMR (400 MHz, DMSO- $d_6$ ) $\delta$ 9.62 (br s, 1H), 9.05 (br s, 1H), 7.58 (d, $J = 5.1$ Hz, 1H), 7.01 (d, $J = 5.2$ Hz, 1H), 4.31 (m, 2H), 3.40 (m, 1H), 2.64 (t, $J = 7.8$ Hz, 2H), 2.36 (t, $J = 11.7$ Hz, 1H), 2.31 – 2.23 (m, 1H), 2.13 (m, 1H), 2.06 – 1.92 (m, 2H), 1.85 – 1.74 (m, 1H), 1.53 (m, 2H), 1.41 (d, $J = 9.9$ Hz, 1H), 1.33 (q, $J = 7.4$ Hz, 2H), 1.20 (s, 3H), 1.11 (d, $J = 7.0$ Hz, 3H), 0.94 – 0.87 (m, 6H). $^{13}C$ NMR (126 MHz, DMSO) $\delta$ 144.41, 129.16, 127.43, 126.78, 55.64, 47.41, 41.02, 40.82, 40.41, 38.85, 32.87, 32.25, 31.20, 27.88, 27.70, 23.62, 22.40, 21.00, 14.23. HRMS: $m/z$ ( $M + H^+$ ): calculated, 306.22, found, 306.22501. HPLC: solvent, $H_2O$ (0.1 % HCOOH), flow rate, 0.8 mL/min, retention time 6.79 min, purity 99.73 %. |
|  <p>Compound <b>16</b></p> | (1R,2R,3R,5S)-N-((3-ethoxythiophen-2-yl)methyl)-2,6,6-trimethyl bicyclo [3.1.1] heptan-3-amine ( <b>16</b> . HCl). Method E. Yield, 66%. $^1H$ NMR (400 MHz, DMSO- $d_6$ ) $\delta$ 9.56 (br s, 1H), 8.97 (br s, 1H), 7.61 (d, $J = 5.4$ Hz, 1H), 7.07 (d, $J = 5.4$ Hz, 1H), 4.17 (s, 2H), 4.12 (q, $J = 6.9$ Hz, 2H), 3.25 (m, 1H), 2.41 (t, $J = 11.7$ Hz, 1H), 2.28 (m, 1H), 2.07 (m, 1H), 2.02 – 1.88 (m, 2H), 1.78 (t, $J = 5.8$ Hz, 1H), 1.31 (t, $J = 7.3$ Hz, 4H), 1.19 (s, 3H), 1.03 (d, $J = 7.0$ Hz, 3H), 0.86 (s, 3H). $^{13}C$ NMR (126 MHz, DMSO) $\delta$ 157.27, 127.27, 117.18, 108.67, 67.30, 54.56, 47.25, 40.81, 40.59, 39.01, 38.84, 32.49, 30.98, 27.70, 23.55, 20.79, 15.35. HRMS: $m/z$ ( $M + H^+$ ): calculated, 294.18, found, 294.18881. HPLC: solvent, $H_2O$ (0.1 % HCOOH), flow rate, 0.8 mL/min, retention time 6.12 min, purity 99.50 %.                                                                             |
|  <p>Compound <b>17</b></p> | (1R,2R,3R,5S)-2,6,6-trimethyl-N-((3-vinylthiophen-2-yl)methyl) bicyclo [3.1.1] heptan-3-amine ( <b>17</b> . HCl). Method D, then Method E. Yield, 11%. $^1H$ NMR (400 MHz, DMSO- $d_6$ ) $\delta$ 9.64 (br s, 1H), 9.09 (br s, 1H), 7.65 (d, $J = 5.3$ Hz, 1H), 7.42 (d, $J = 5.3$ Hz, 1H), 6.97 (dd, $J = 17.3, 11.0$ Hz, 1H), 5.79 (dd, $J = 17.2, 1.3$ Hz, 1H), 5.37 (dd, $J = 10.9, 1.3$ Hz, 1H), 4.45 (m, 2H), 3.38 (m, 1H), 2.41 – 2.20 (m, 2H), 2.19 – 2.06 (m, 1H), 2.05 – 1.92 (m, 2H), 1.83 – 1.72 (m, 1H), 1.37 (d, $J = 9.9$ Hz, 1H), 1.19 (s, 3H), 1.08 (d, $J = 7.0$ Hz, 3H), 0.86 (s, 3H). $^{13}C$ NMR (126 MHz, DMSO) $\delta$ 140.91, 137.87, 129.19, 128.39, 125.49, 116.63, 55.60, 47.41, 40.80, 38.84, 32.30, 31.18, 27.70, 23.55, 20.95. HRMS: $m/z$ ( $M + H^+$ ): calculated, 276.17, found, 276.17809. HPLC: solvent, $H_2O$ (0.1 % HCOOH), flow rate, 0.8 mL/min, retention time 6.26 min, purity 99.80 %.                   |

|                                                                                                               |                                                                                                                                                                                                                                                                                                                                                                                                                                                                                                                                                                                                                                                                                                                                                                                                                                                                                                                                                                                                                                      |
|---------------------------------------------------------------------------------------------------------------|--------------------------------------------------------------------------------------------------------------------------------------------------------------------------------------------------------------------------------------------------------------------------------------------------------------------------------------------------------------------------------------------------------------------------------------------------------------------------------------------------------------------------------------------------------------------------------------------------------------------------------------------------------------------------------------------------------------------------------------------------------------------------------------------------------------------------------------------------------------------------------------------------------------------------------------------------------------------------------------------------------------------------------------|
| 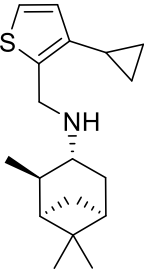 <p>Compound <b>18</b></p>   | <p>(1R,2R,3R,5S)-N-(3-cyclopropylthiophen-2-yl)methyl-2,6,6-trimethylbicyclo[3.1.1]heptan-3-amine (<b>M090</b>. H<sub>3</sub>PO<sub>4</sub>). Method D, then Method E. Yield, 13%. <sup>1</sup>H NMR (400 MHz, DMSO-<i>d</i><sub>6</sub>) δ 9.70 (br s, 1H), 9.09 (br s, 1H), 7.54 (d, <i>J</i> = 5.2 Hz, 1H), 6.67 (d, <i>J</i> = 5.3 Hz, 1H), 4.48-4.37 (m, 2H), 3.42 (m, 1H, overlap with H<sub>2</sub>O peak), 2.44 – 2.34 (m, 1H), 2.27 (m, 1H), 2.18 – 2.06 (m, 2H), 2.05 – 1.92 (m, 2H), 1.80 – 1.76 (m, 1H), 1.38 (d, <i>J</i> = 9.9 Hz, 1H), 1.19 (s, 3H), 1.08 (d, <i>J</i> = 7.0 Hz, 3H), 0.99 – 0.94 (m, 2H), 0.87 (s, 3H), 0.72 (m, 1H), 0.64 (m, 1H). <sup>13</sup>C NMR (126 MHz, DMSO) δ 145.75, 127.37, 126.15, 124.85, 54.75, 46.90, 40.53, 40.39, 39.76, 38.43, 31.91, 30.69, 27.28, 23.16, 20.52, 9.55, 8.86, 8.62. HRMS: <i>m/z</i> (M + H<sup>+</sup>): calculated, 290.19, found, 290.19376. HPLC: solvent, H<sub>2</sub>O (0.1 % HCOOH), flow rate, 0.8 mL/min, retention time 6.33 min, purity 99.84 %.</p> |
|  <p>Compound <b>19</b></p>  | <p>(1R,2R,3R,5S)-N-(3-cyclopentylthiophen-2-yl)methyl-2,6,6-trimethylbicyclo[3.1.1]heptan-3-amine (<b>19</b>. HCl). Method A, Method B, then Method E. Yield, 4%. <sup>1</sup>H NMR (400 MHz, DMSO-<i>d</i><sub>6</sub>) δ 9.74 (br s, 1H), 9.05 (br s, 1H), 7.59 (d, <i>J</i> = 5.2 Hz, 1H), 7.06 (d, <i>J</i> = 5.2 Hz, 1H), 4.45 – 4.16 (m, 2H), 3.37 (m, 1H), 3.20 (p, <i>J</i> = 8.8 Hz, 1H), 2.40 – 2.19 (m, 2H), 2.19 – 2.07 (m, 1H), 2.07 – 1.87 (m, 4H), 1.80-1.73 (m, 3H), 1.70 – 1.57 (m, 2H), 1.54-1.41 (m, 3H), 1.20 (s, 3H), 1.09 (d, <i>J</i> = 7.3 Hz, 3H), 0.87 (s, 3H). <sup>13</sup>C NMR (126 MHz, DMSO) δ 148.60, 127.77, 126.96, 126.35, 55.39, 47.39, 40.83, 40.42, 38.85, 38.56, 34.97, 34.78, 32.31, 31.04, 27.70, 25.67, 23.58, 20.95. HRMS: <i>m/z</i> (M + H<sup>+</sup>): calculated, 318.22, found, 318.22491. HPLC: solvent, H<sub>2</sub>O (0.1 % HCOOH), flow rate, 0.8 mL/min, retention time 6.66 min, purity 99.25 %.</p>                                                                        |
|  <p>Compound <b>20</b></p> | <p>(1R,2R,3R,5S)-N-(3-cyclohexylthiophen-2-yl)methyl-2,6,6-trimethylbicyclo[3.1.1]heptan-3-amine (<b>20</b>. HCl). Method A, Method B, then Method E. Yield, 7%. <sup>1</sup>H NMR (400 MHz, DMSO-<i>d</i><sub>6</sub>) δ 9.76 (br s, 1H), 9.05 (br s, 1H), 7.58 (d, <i>J</i> = 5.2 Hz, 1H), 7.07 (d, <i>J</i> = 5.3 Hz, 1H), 4.43 – 4.24 (m, 2H), 3.33 (m, 1H), 2.86 – 2.69 (m, 1H), 2.43 – 2.22 (m, 2H), 2.14 (m, 1H), 2.08 – 1.93 (m, 2H), 1.85 – 1.61 (m, 6H), 1.47-1.35 (m, 5H), 1.24 (m, 1H), 1.20 (s, 3H), 1.08 (d, <i>J</i> = 7.0 Hz, 3H), 0.87 (s, 3H). <sup>13</sup>C NMR (126 MHz, DMSO) δ 149.81, 127.72, 127.05, 125.74, 55.26, 47.33, 40.85, 40.64, 38.84, 37.32, 34.29, 34.21, 32.31, 31.03, 27.68, 26.56, 26.48, 25.84, 23.57, 20.91. HRMS: <i>m/z</i> (M + H<sup>+</sup>): calculated, 332.23, found, 332.24063. HPLC: gradient solvent, 10 % to 100 % TFA in H<sub>2</sub>O, flow rate, 1.0 mL/min, retention time 14.03 min, purity 96.15 %.</p>                                                                  |

|                                                                                                               |                                                                                                                                                                                                                                                                                                                                                                                                                                                                                                                                                                                                                                                                                                                                                                                                                                                                                                                                         |
|---------------------------------------------------------------------------------------------------------------|-----------------------------------------------------------------------------------------------------------------------------------------------------------------------------------------------------------------------------------------------------------------------------------------------------------------------------------------------------------------------------------------------------------------------------------------------------------------------------------------------------------------------------------------------------------------------------------------------------------------------------------------------------------------------------------------------------------------------------------------------------------------------------------------------------------------------------------------------------------------------------------------------------------------------------------------|
| 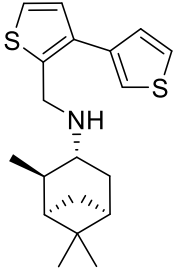 <p>Compound <b>21</b></p>   | <p>(1R,2R,3R,5S)-N-([3,3'-bithiophen]-2-ylmethyl)-2,6,6-trimethylbicyclo [3.1.1] heptan-3-amine (<b>21</b>. HCl). Method E. Yield, 70%. <sup>1</sup>H NMR (400 MHz, DMSO-<i>d</i><sub>6</sub>) δ 9.70 (br s, 1H), 9.05 (br s, 1H), 7.76 (d, <i>J</i> = 5.0 Hz, 1H), 7.73-7.71 (m, 2H), 7.32 (d, <i>J</i> = 4.7 Hz, 1H), 7.23 (d, <i>J</i> = 5.0 Hz, 1H), 4.43 (m, 2H), 3.22 (m, 1H), 2.23 (m, 1H), 2.06 (m, 1H), 1.94 (m, 1H), 1.84 (m, 1H), 1.75 (m, 2H), 1.29 (d, <i>J</i> = 9.4 Hz, 1H), 1.16 (s, 3H), 1.02 (d, <i>J</i> = 6.9 Hz, 3H), 0.79 (s, 3H). <sup>13</sup>C NMR (126 MHz, DMSO) δ 139.10, 135.73, 129.51, 128.84, 128.20, 128.15, 127.57, 124.37, 55.36, 47.31, 41.58, 40.82, 40.41, 38.85, 32.29, 30.63, 27.71, 23.72, 20.95. HRMS: <i>m/z</i> (M + H<sup>+</sup>): calculated, 332.14, found, 332.15005. HPLC: solvent, H<sub>2</sub>O (0.1 % HCOOH), flow rate, 0.8 mL/min, retention time 6.53 min, purity 99.87 %.</p> |
|  <p>Compound <b>22</b></p>  | <p>(1R,2R,3R,5S)-2,6,6-trimethyl-N-(3-phenylthiophen-2-yl)methyl bicyclo [3.1.1] heptan-3-amine (<b>22</b>. HCl). Method E. 76%. <sup>1</sup>H NMR (400 MHz, DMSO-<i>d</i><sub>6</sub>) δ 9.91 (br s, 1H), 9.14 (br s, 1H), 7.78 (d, <i>J</i> = 5.2 Hz, 1H), 7.51-7.40 (m, 5H), 7.19 (d, <i>J</i> = 5.2 Hz, 1H), 4.36 (m, 2H), 3.09 (m, 1H), 2.20 (m, 1H), 2.03 (m, 1H), 1.77-1.70 (m, 4H), 1.28 (d, <i>J</i> = 9.9 Hz, 1H), 1.14 (s, 3H), 1.00 (d, <i>J</i> = 7.0 Hz, 3H), 0.75 (s, 3H). <sup>13</sup>C NMR (126 MHz, DMSO) δ 144.45, 135.36, 129.53, 129.33, 129.25, 128.33, 128.30, 128.21, 55.01, 47.21, 41.29, 40.71, 40.38, 38.75, 32.22, 30.36, 27.61, 23.66, 20.81. HRMS: <i>m/z</i> (M + H<sup>+</sup>): calculated, 326.19, found, 326.19363. HPLC: solvent, H<sub>2</sub>O (0.1 % HCOOH), flow rate, 0.8 mL/min, retention time 6.68 min, purity 99.70 %.</p>                                                                |
|  <p>Compound <b>23</b></p> | <p>(1R,2R,3R,5S)-N-((4-bromothiophen-2-yl)methyl)-2,6,6-trimethylbicyclo [3.1.1] heptan-3-amine (<b>23</b>. HCl). Method E. 88%. <sup>1</sup>H NMR (400 MHz, DMSO-<i>d</i><sub>6</sub>) δ 9.63 (br s, 1H), 9.26 (br s, 1H), 7.77 (d, <i>J</i> = 1.5 Hz, 1H), 7.47 (d, <i>J</i> = 1.6 Hz, 1H), 4.40 (m, 2H), 3.40 (m, 1H), 2.30 (m, 2H), 2.21 – 2.09 (m, 1H), 2.03 – 1.90 (m, 2H), 1.80 (m, 1H), 1.36 (d, <i>J</i> = 9.9 Hz, 1H), 1.20 (s, 3H), 1.12 (d, <i>J</i> = 7.1 Hz, 3H), 0.88 (s, 3H). <sup>13</sup>C NMR (126 MHz, DMSO) δ 135.73, 133.31, 126.14, 108.84, 55.58, 47.54, 42.44, 40.81, 40.24, 38.91, 32.26, 31.14, 27.75, 23.71, 21.15. HRMS: <i>m/z</i> (M + H<sup>+</sup>): calculated, 328.07, found, 328.07288. HPLC: solvent, H<sub>2</sub>O (0.1 % HCOOH), flow rate, 0.8 mL/min, retention time 6.07 min, purity 99.78 %.</p>                                                                                            |

|                                                                                                               |                                                                                                                                                                                                                                                                                                                                                                                                                                                                                                                                                                                                                                                                                                                                                                                                                                                                                                                                                      |
|---------------------------------------------------------------------------------------------------------------|------------------------------------------------------------------------------------------------------------------------------------------------------------------------------------------------------------------------------------------------------------------------------------------------------------------------------------------------------------------------------------------------------------------------------------------------------------------------------------------------------------------------------------------------------------------------------------------------------------------------------------------------------------------------------------------------------------------------------------------------------------------------------------------------------------------------------------------------------------------------------------------------------------------------------------------------------|
| 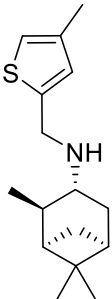 <p>Compound <b>24</b></p>   | <p>(1R,2R,3R,5S)-2,6,6-trimethyl-N-(4-methylthiophen-2-yl)methyl bicyclo [3.1.1] heptan-3-amine (<b>24</b>. HCl). Method E. 80%. <sup>1</sup>H NMR (400 MHz, DMSO-<i>d</i><sub>6</sub>) δ 9.45 (br s, 1H), 9.09 (br s, 1H), 7.21 (s, 2H), 4.34 (m, 2H), 3.38 (m, 1H), 2.39 – 2.25 (m, 2H), 2.21 (s, 3H), 2.16 – 2.06 (m, 1H), 1.96 (m, 2H), 1.80 (m, 1H), 1.34 (d, <i>J</i> = 9.9 Hz, 1H), 1.20 (s, 3H), 1.10 (d, <i>J</i> = 7.0 Hz, 3H), 0.87 (s, 3H). <sup>13</sup>C NMR (126 MHz, DMSO) δ 137.11, 132.75, 123.10, 64.84, 54.62, 46.97, 42.36, 40.29, 38.36, 31.82, 30.66, 27.22, 23.15, 20.52, 15.25, 15.11. HRMS: <i>m/z</i> (M + H<sup>+</sup>): calculated, 264.17, found, 264.17810. HPLC: solvent, H<sub>2</sub>O (0.1 % HCOOH), flow rate, 0.8 mL/min, retention time 6.15 min, purity 99.78 %.</p>                                                                                                                                         |
|  <p>Compound <b>25</b></p>  | <p>(1R,2R,3R,5S)-N-(4-ethylthiophen-2-yl)methyl-2,6,6-trimethylbicyclo [3.1.1] heptan-3-amine (<b>25</b>. HCl). Method C, then Method E. Yield, 10%. <sup>1</sup>H NMR (400 MHz, DMSO-<i>d</i><sub>6</sub>) δ 9.78 (br s, 1H), 9.29 (br s, 1H), 7.31 (s, 1H), 7.22 (s, 1H), 4.30 (m, 2H), 3.28 (m, 1H), 2.57 (q, <i>J</i> = 7.5 Hz, 2H), 2.38 – 2.20 (m, 2H), 2.15 (m, 1H), 1.97 (m, 2H), 1.78 (t, <i>J</i> = 5.8 Hz, 1H), 1.42 (d, <i>J</i> = 9.8 Hz, 1H), 1.22 – 1.13 (m, 6H), 1.09 (d, <i>J</i> = 7.1 Hz, 3H), 0.85 (s, 3H). <sup>13</sup>C NMR (126 MHz, DMSO) δ 144.16, 132.74, 131.69, 122.00, 64.92, 54.52, 46.99, 42.35, 40.31, 38.44, 31.87, 30.59, 27.30, 23.18, 22.94, 20.57, 14.76. HRMS (EI): <i>m/z</i> (M): calculated, 277.19, found, 277.1869. HPLC: gradient solvent, 10 % to 80% KH<sub>2</sub>PO<sub>4</sub> in H<sub>2</sub>O, flow rate, 1.0 mL/min, retention time 13.38 min, purity 99.07 %</p>                              |
|  <p>Compound <b>26</b></p> | <p>(1R,2R,3R,5S)-2,6,6-trimethyl-N-(4-propylthiophen-2-yl)methyl bicyclo [3.1.1] heptan-3-amine (<b>26</b>. HCl). Method C, then Method E. Yield, 13%. <sup>1</sup>H NMR (400 MHz, DMSO-<i>d</i><sub>6</sub>) δ 9.85 (br s, 1H), 9.31 (br s, 1H), 7.30 (s, 1H), 7.22 (s, 1H), 4.42 – 4.23 (m, 2H), 3.25 (m, 1H), 2.53 (t, <i>J</i> = 7.2 Hz, 2H), 2.28 (m, 2H), 2.15 (m, 1H), 2.05 – 1.92 (m, 2H), 1.78 (t, <i>J</i> = 5.8 Hz, 1H), 1.58 (m, 2H), 1.42 (d, <i>J</i> = 9.9 Hz, 1H), 1.19 (s, 3H), 1.08 (d, <i>J</i> = 7.1 Hz, 3H), 0.88 (t, <i>J</i> = 7.3 Hz, 3H), 0.84 (s, 3H). <sup>13</sup>C NMR (126 MHz, DMSO) δ 142.91, 132.96, 132.38, 123.12, 54.78, 47.46, 42.71, 40.78, 40.23, 38.84, 32.32, 32.11, 30.94, 27.70, 23.56, 23.54, 20.92, 13.94. HRMS: <i>m/z</i> (M + H<sup>+</sup>): calculated, 292.20, found, 292.20929. HPLC: solvent, H<sub>2</sub>O (0.1 % HCOOH), flow rate, 0.8 mL/min, retention time 6.49 min, purity 99.83 %.</p> |



|                                                                                                               |                                                                                                                                                                                                                                                                                                                                                                                                                                                                                                                                                                                                                                                                                                                                                                                                                                                                                                                                                                                  |
|---------------------------------------------------------------------------------------------------------------|----------------------------------------------------------------------------------------------------------------------------------------------------------------------------------------------------------------------------------------------------------------------------------------------------------------------------------------------------------------------------------------------------------------------------------------------------------------------------------------------------------------------------------------------------------------------------------------------------------------------------------------------------------------------------------------------------------------------------------------------------------------------------------------------------------------------------------------------------------------------------------------------------------------------------------------------------------------------------------|
| 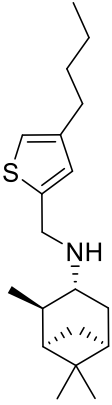 <p>Compound <b>27</b></p>   | <p>(1R,2R,3R,5S)-N-((4-butylthiophen-2-yl) methyl)-2,6,6-trimethyl bicyclo [3.1.1] heptan-3-amine (<b>27</b>. HCl). Method C, then Method E. 18%. <sup>1</sup>H NMR (400 MHz, DMSO-<i>d</i><sub>6</sub>) δ 9.78 (br s, 1H), 9.26 (br s, 1H), 7.29 (s, 1H), 7.22 (s, 1H), 4.32 (m, 2H), 3.25 (m, 1H), 2.56 (t, <i>J</i> = 7.5 Hz, 2H), 2.36 – 2.21 (m, 2H), 2.14 (m, 1H), 2.04 – 1.90 (m, 2H), 1.79 (m, <i>J</i> = 5.8 Hz, 1H), 1.54 (m, 2H), 1.40 (d, <i>J</i> = 9.9 Hz, 1H), 1.29 (m, 2H), 1.19 (s, 3H), 1.07 (d, <i>J</i> = 7.0 Hz, 3H), 0.88 (t, <i>J</i> = 7.4 Hz, 3H), 0.84 (s, 3H). <sup>13</sup>C NMR (126 MHz, DMSO) δ 143.06, 132.97, 132.34, 123.02, 54.81, 47.47, 42.75, 40.79, 40.26, 38.84, 32.53, 32.34, 30.98, 29.69, 27.71, 23.52, 22.01, 20.91, 14.10. HRMS: <i>m/z</i> (M + H<sup>+</sup>): calculated, 306.22, found, 306.22507. HPLC: solvent, H<sub>2</sub>O (0.1 % HCOOH), flow rate, 0.8 mL/min, retention time 6.49 min, purity 99.94 %.</p>             |
|  <p>Compound <b>28</b></p>  | <p>(1R,2R,3R,5S)-2,6,6-trimethyl-N-((4-vinylthiophen-2-yl) methyl) bicyclo [3.1.1] heptan-3-amine (<b>28</b>. HCl). Method D, then Method E. Yield, 14%. <sup>1</sup>H NMR (400 MHz, DMSO-<i>d</i><sub>6</sub>) δ 9.65 (br s, 1H), 9.24 (br s, 1H), 7.66 (s, 1H), 7.56 (s, 1H), 6.70 (dd, <i>J</i> = 17.6, 11.0 Hz, 1H), 5.61 (d, <i>J</i> = 17.6 Hz, 1H), 5.22 (d, <i>J</i> = 11.0 Hz, 1H), 4.35 (m, 2H), 3.35 (m, 1H), 2.33 (m, 2H), 2.15 (m, 1H), 2.06 – 1.88 (m, 2H), 1.79 (t, <i>J</i> = 5.8 Hz, 1H), 1.38 (d, <i>J</i> = 9.8 Hz, 1H), 1.20 (s, 3H), 1.11 (d, <i>J</i> = 7.1 Hz, 3H), 0.87 (s, 3H). <sup>13</sup>C NMR (126 MHz, DMSO) δ 139.89, 133.78, 130.87, 128.34, 125.09, 114.19, 54.93, 46.98, 42.52, 40.29, 38.38, 31.80, 30.71, 27.23, 23.17, 20.57. HRMS: <i>m/z</i> (M + H<sup>+</sup>): calculated, 276.17, found, 276.17822. HPLC: gradient solvent, 10 % to 100 % TFA in H<sub>2</sub>O, flow rate, 1.0 mL/min, retention time 12.12 min, purity 96.56 %</p> |
|  <p>Compound <b>29</b></p> | <p>(1R,2R,3R,5S)-2,6,6-trimethyl-N-(4-(prop-1-en-2-yl) thiophen-2-yl) methyl) bicyclo [3.1.1] heptan-3-amine (<b>29</b>. HCl). Method D, then Method E. Yield, 10 %. <sup>1</sup>H NMR (400 MHz, DMSO-<i>d</i><sub>6</sub>) δ 9.87 (s, 1H), 9.39 (s, 1H), 7.73 (s, 1H), 7.54 (s, 1H), 5.37 (s, 1H), 5.05 (s, 1H), 4.34 (m, 2H), 3.33 (m, 1H), 2.40 – 2.12 (m, 3H), 2.05 (s, 3H), 2.00-1.94 (m, 2H), 1.78 (t, <i>J</i> = 5.9 Hz, 1H), 1.44 (d, <i>J</i> = 9.9 Hz, 1H), 1.19 (s, 3H), 1.10 (d, <i>J</i> = 7.0 Hz, 3H), 0.86 (s, 3H). <sup>13</sup>C NMR (126 MHz, DMSO) δ 142.74, 138.11, 133.68, 129.50, 123.58, 112.29, 55.25, 47.48, 42.87, 40.77, 40.20, 38.86, 32.23, 31.07, 27.70, 23.62, 21.64, 21.05. HRMS: <i>m/z</i> (M + H<sup>+</sup>): calculated, 290.19, found, 290.19362. HPLC: gradient solvent, 10 % to 100 % TFA in H<sub>2</sub>O, flow rate, 1.0 mL/min, retention time 12.53 min, purity 96.20 %</p>                                                         |

|                                                                                                               |                                                                                                                                                                                                                                                                                                                                                                                                                                                                                                                                                                                                                                                                                                                                                                                                                                                                                                               |
|---------------------------------------------------------------------------------------------------------------|---------------------------------------------------------------------------------------------------------------------------------------------------------------------------------------------------------------------------------------------------------------------------------------------------------------------------------------------------------------------------------------------------------------------------------------------------------------------------------------------------------------------------------------------------------------------------------------------------------------------------------------------------------------------------------------------------------------------------------------------------------------------------------------------------------------------------------------------------------------------------------------------------------------|
| 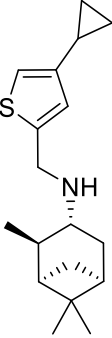 <p>Compound <b>30</b></p>   | <p>(1R,2R,3R,5S)-N-((4-cyclopropylthiophen-2-yl) methyl)-2,6,6-trimethyl bicyclo [3.1.1] heptan-3-amine (<b>30</b>. HCl). Method D, then Method E. Yield, 18%. <sup>1</sup>H NMR (400 MHz, DMSO-<i>d</i><sub>6</sub>) δ 9.62 (br s, 1H), 9.18 (br s, 1H), 7.18 (s, 1H), 7.17 (s, 1H), 4.29 (m, 2H), 3.30 (m, 1H), 2.38 – 2.20 (m, 2H), 2.18 – 2.06 (m, 1H), 2.03 – 1.86 (m, 3H), 1.79 (t, <i>J</i> = 5.7 Hz, 1H), 1.38 (d, <i>J</i> = 9.9 Hz, 1H), 1.19 (s, 3H), 1.09 (d, <i>J</i> = 6.8 Hz, 3H), 0.89 (m, 2H), 0.85 (s, 3H), 0.58 (m, 2H). <sup>13</sup>C NMR (126 MHz, DMSO) δ 144.73, 132.73, 129.57, 120.24, 54.67, 46.97, 42.45, 40.28, 39.78, 38.38, 31.82, 30.64, 27.23, 23.14, 20.53, 11.08, 8.55, 8.50. HRMS: <i>m/z</i> (M + H<sup>+</sup>): calculated, 290.19, found, 290.19379. HPLC: solvent, H<sub>2</sub>O (0.1 % HCOOH), flow rate, 0.8 mL/min, retention time 6.28 min, purity 98.36 %.</p> |
|  <p>Compound <b>31</b></p>  | <p>(1R,2R,3R,5S)-N-(4-cyclopentylthiophen-2-yl) methyl)-2,6,6-trimethyl bicyclo [3.1.1] heptan-3-amine (<b>31</b>. HCl). Method A, Method C, then Method E. Yield, 9%. <sup>1</sup>H NMR (400 MHz, DMSO-<i>d</i><sub>6</sub>) δ 9.69 (br s, 1H), 9.22 (br s, 1H), 7.34 (s, 1H), 7.23 (s, 1H), 4.43 – 4.23 (m, 2H), 3.28 (m, 1H), 3.00 (m, 1H), 2.38 – 2.21 (m, 2H), 2.14 (m, 1H), 2.01-1.94 (m, 4H), 1.82 – 1.43 (m, 7H), 1.39 (d, <i>J</i> = 9.8 Hz, 1H), 1.19 (s, 3H), 1.09 (d, <i>J</i> = 7.1 Hz, 3H), 0.85 (s, 3H). <sup>13</sup>C NMR (126 MHz, DMSO) δ 147.36, 133.14, 131.43, 121.71, 55.08, 47.47, 42.94, 41.05, 40.77, 40.22, 38.84, 34.02, 32.31, 31.07, 27.70, 25.07, 23.54, 20.96. HRMS: <i>m/z</i> (M + H<sup>+</sup>): calculated, 318.22, found, 318.22485. HPLC: solvent, H<sub>2</sub>O (0.1 % HCOOH), flow rate, 0.8 mL/min, retention time 6.89 min, purity 99.74 %.</p>                   |
|  <p>Compound <b>32</b></p> | <p>(1R,2R,3R,5S)-N-(4-cyclohexylthiophen-2-yl) methyl)-2,6,6-trimethyl bicyclo [3.1.1] heptan-3-amine (<b>32</b>. HCl). Method A, Method C, then Method E. Yield, 8%. <sup>1</sup>H NMR (400 MHz, DMSO-<i>d</i><sub>6</sub>) δ 9.67 (br s, 1H), 9.22 (br s, 1H), 7.36 (s, 1H), 7.22 (s, 1H), 4.44 – 4.22 (m, 2H), 3.27 (m, 1H), 2.55 (m, 1H), 2.41 – 2.21 (m, 2H), 2.14 (m, 1H), 2.02 – 1.63 (m, 8H), 1.45 – 1.26 (m, 5H), 1.19 (s, 4H), 1.08 (d, <i>J</i> = 7.1 Hz, 3H), 0.85 (s, 3H). <sup>13</sup>C NMR (126 MHz, DMSO) δ 148.93, 132.91, 131.12, 121.46, 55.06, 47.46, 42.96, 40.76, 40.23, 39.27, 38.83, 34.09, 34.05, 32.32, 31.06, 27.70, 26.36, 26.01, 23.54, 20.96. HRMS: <i>m/z</i> (M + H<sup>+</sup>): calculated, 332.23, found, 332.24066. HPLC: solvent, H<sub>2</sub>O (0.1 % HCOOH), flow rate, 0.8 mL/min, retention time 7.27 min, purity 99.47 %.</p>                                     |

|                                                                                                               |                                                                                                                                                                                                                                                                                                                                                                                                                                                                                                                                                                                                                                                                                                                                                                                                                                                                                                                                                                                                       |
|---------------------------------------------------------------------------------------------------------------|-------------------------------------------------------------------------------------------------------------------------------------------------------------------------------------------------------------------------------------------------------------------------------------------------------------------------------------------------------------------------------------------------------------------------------------------------------------------------------------------------------------------------------------------------------------------------------------------------------------------------------------------------------------------------------------------------------------------------------------------------------------------------------------------------------------------------------------------------------------------------------------------------------------------------------------------------------------------------------------------------------|
| 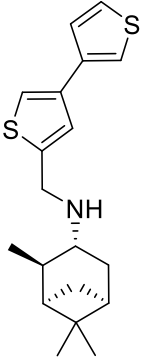 <p>Compound <b>33</b></p>   | <p>(1R,2R,3R,5S)-N-([3,3'-bithiophen]-5-ylmethyl)-2,6,6-trimethylbicyclo [3.1.1] heptan-3-amine (<b>33</b>. HCl). Method E. Yield, 71%. <sup>1</sup>H NMR (400 MHz, DMSO-<i>d</i><sub>6</sub>) δ 9.78 (br s, 1H), 9.35 (br s, 1H), 7.85 (s, 1H), 7.83 (s, 1H), 7.72(d, <i>J</i> = 2.9 Hz, 1H), 7.62 (dd, <i>J</i> = 5.0, 2.9 Hz, 1H), 7.48 (d, <i>J</i> = 5.0 Hz, 1H), 4.39 (m, 2H), 3.36 (m, 1H), 2.36 (t, <i>J</i> = 11.6 Hz, 1H), 2.27 (m, 1H), 2.18 (m, 1H), 2.04-1.97 (m, 2H), 1.79 (t, <i>J</i> = 5.2 Hz, 1H), 1.42 (d, <i>J</i> = 9.9 Hz, 1H), 1.20 (s, 3H), 1.12 (d, <i>J</i> = 7.1 Hz, 3H), 0.87 (s, 3H). <sup>13</sup>C NMR (126 MHz, DMSO) δ 136.99, 136.84, 134.13, 130.45, 127.54, 126.61, 122.68, 120.91, 55.32, 47.47, 42.93, 40.78, 38.86, 32.29, 31.14, 27.70, 23.65, 21.05. HRMS: <i>m/z</i> (M + H<sup>+</sup>): calculated, 332.14, found, 332.15018. HPLC: solvent, H<sub>2</sub>O (0.1 % HCOOH), flow rate, 0.8 mL/min, retention time 6.59 min, purity 99.83 %.</p>            |
|  <p>Compound <b>34</b></p>  | <p>(1R,2R,3R,5S)-2,6,6-trimethyl-N-(4-phenylthiophen-2-yl)methyl bicyclo [3.1.1] heptan-3-amine (<b>34</b>. HCl). Method E. Yield, 65%. <sup>1</sup>H NMR (400 MHz, DMSO-<i>d</i><sub>6</sub>) δ 9.74 (br s, 1H), 9.34 (br s, 1H), 7.94 (s, 1H), 7.91 (s, 1H), 7.68 (d, <i>J</i> = 7.6 Hz, 2H), 7.44 (t, <i>J</i> = 7.6 Hz, 2H), 7.32 (t, <i>J</i> = 7.4 Hz, 1H), 4.64 – 4.23 (m, 2H), 3.39 (m, 1H), 2.38 (t, <i>J</i> = 11.9 Hz, 1H), 2.28 (m, 1H), 2.24 – 2.12 (m, 1H), 2.07 – 1.93 (m, 2H), 1.81 (t, <i>J</i> = 5.9 Hz, 1H), 1.42 (d, <i>J</i> = 9.9 Hz, 1H), 1.20 (s, 3H), 1.13 (d, <i>J</i> = 7.1 Hz, 3H), 0.88 (s, 3H). <sup>13</sup>C NMR (126 MHz, DMSO) δ 141.59, 135.15, 134.44, 130.18, 129.44, 127.81, 126.26, 123.24, 55.43, 47.47, 43.02, 40.78, 38.85, 32.29, 31.20, 27.70, 23.64, 21.07. HRMS: <i>m/z</i> (M + H<sup>+</sup>): calculated, 326.19, found, 326.19358. HPLC: solvent, H<sub>2</sub>O (0.1 % HCOOH), flow rate, 0.8 mL/min, retention time 6.75 min, purity 99.83 %.</p> |
|  <p>Compound <b>35</b></p> | <p>(1R,2R,3R,5S)-N-(5-chlorothiophen-2-yl)methyl-2,6,6-trimethyl bicyclo [3.1.1] heptan-3-amine (<b>35</b>. HCl). Method E. Yield, 66%. <sup>1</sup>H NMR (400 MHz, DMSO-<i>d</i><sub>6</sub>) δ 9.82 (br s, 1H), 9.41 (br s, 1H), 7.31 (d, <i>J</i> = 3.8 Hz, 1H), 7.12 (d, <i>J</i> = 3.8 Hz, 1H), 4.35 (m, 2H), 3.30 (m, 1H), 2.38 – 2.22 (m, 2H), 2.16 (m, 1H), 2.06 – 1.90 (m, 2H), 1.79 (t, <i>J</i> = 5.8 Hz, 1H), 1.41 (d, <i>J</i> = 9.9 Hz, 1H), 1.20 (s, 3H), 1.12 (d, <i>J</i> = 7.0 Hz, 3H), 0.87 (s, 3H). <sup>13</sup>C NMR (126 MHz, DMSO) δ 132.92, 131.53, 130.21, 127.11, 55.16, 47.49, 42.81, 40.77, 40.22, 38.85, 32.23, 31.01, 27.69, 23.65, 21.07. HRMS: <i>m/z</i> (M + H<sup>+</sup>): calculated, 284.12, found, 284.12357. HPLC: solvent, H<sub>2</sub>O (0.1 % HCOOH), flow rate, 0.8 mL/min, retention time 5.93 min, purity 99.94 %.</p>                                                                                                                                |

|                                                                                                               |                                                                                                                                                                                                                                                                                                                                                                                                                                                                                                                                                                                                                                                                                                                                                                                                                                                                                                                                                |
|---------------------------------------------------------------------------------------------------------------|------------------------------------------------------------------------------------------------------------------------------------------------------------------------------------------------------------------------------------------------------------------------------------------------------------------------------------------------------------------------------------------------------------------------------------------------------------------------------------------------------------------------------------------------------------------------------------------------------------------------------------------------------------------------------------------------------------------------------------------------------------------------------------------------------------------------------------------------------------------------------------------------------------------------------------------------|
| 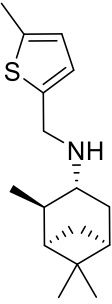 <p>Compound <b>36</b></p>   | <p>(1R,2R,3R,5S)-2,6,6-trimethyl-N-((5-methylthiophen-2-yl)methyl) bicyclo [3.1.1] heptan-3-amine (<b>36</b>. HCl). Method E. Yield, 72%. <sup>1</sup>H NMR (400 MHz, DMSO-<i>d</i><sub>6</sub>) δ 9.68 (br s, 1H), 9.22 (br s, 1H), 7.19 (d, <i>J</i> = 3.5 Hz, 1H), 6.78 (dd, <i>J</i> = 3.4, 1.3 Hz, 1H), 4.29 (m, 2H), 3.28 (m, 1H), 2.45 (d, <i>J</i> = 1.0 Hz, 3H), 2.36 – 2.22 (m, 2H), 2.14 (m, 1H), 1.97 (m, 2H), 1.78 (m, 1H), 1.39 (d, <i>J</i> = 9.9 Hz, 1H), 1.19 (s, 3H), 1.08 (d, <i>J</i> = 7.1 Hz, 3H), 0.85 (s, 3H). <sup>13</sup>C NMR (126 MHz, DMSO) δ 141.59, 130.91, 130.28, 125.51, 54.34, 46.96, 42.33, 40.29, 38.36, 31.85, 30.59, 27.22, 23.17, 20.51, 14.93. HRMS: <i>m/z</i> (M + H<sup>+</sup>): calculated, 264.17, found, 264.17810. HPLC: gradient solvent, 10 % to 100 % TFA in H<sub>2</sub>O, flow rate, 1.0 mL/min, retention time 11.89 min, purity 99.61 %</p>                                          |
|  <p>Compound <b>37</b></p>  | <p>(1R,2R,3R,5S)-N-(5-bromothiophen-2-yl)methyl-2,6,6-trimethyl bicyclo [3.1.1] heptan-3-amine (<b>37</b>. HCl). Method E. Yield, 58%. <sup>1</sup>H NMR (500 MHz, DMSO-<i>d</i><sub>6</sub>) δ 9.98 (br s, 1H), 9.55 (br s, 1H), 7.30 (d, <i>J</i> = 3.8 Hz, 1H), 7.20 (d, <i>J</i> = 3.8 Hz, 1H), 4.35 (t, <i>J</i> = 5.1 Hz, 2H), 3.30 (m, 1H), 2.35 – 2.21 (m, 2H), 2.18 (m, 1H), 2.01 (m, 1H), 1.94 (m, 1H), 1.77 (td, <i>J</i> = 5.8, 1.9 Hz, 1H), 1.46 (d, <i>J</i> = 9.9 Hz, 1H), 1.19 (s, 3H), 1.11 (d, <i>J</i> = 7.1 Hz, 3H), 0.85 (s, 3H). <sup>13</sup>C NMR (126 MHz, DMSO) δ 135.64, 132.51, 130.71, 113.64, 55.26, 47.55, 42.75, 40.83, 40.27, 38.91, 32.29, 31.07, 27.76, 23.72, 21.14. HRMS: <i>m/z</i> (M + H<sup>+</sup>): calculated, 328.07, found, 328.07285. HPLC: gradient solvent, 10 % to 80% KH<sub>2</sub>PO<sub>4</sub> in H<sub>2</sub>O, flow rate, 1.0 mL/min, retention time 12.86 min, purity 99.03 %.</p>  |
|  <p>Compound <b>38</b></p> | <p>(1R,2R,3R,5S)-N-((5-ethylthiophen-2-yl)methyl)-2,6,6-trimethyl bicyclo [3.1.1] heptan-3-amine (<b>38</b>. HCl). Method E. Yield, 50%. <sup>1</sup>H NMR (400 MHz, DMSO-<i>d</i><sub>6</sub>) δ 9.58 (br s, 1H), 9.16 (br s, 1H), 7.20 (d, <i>J</i> = 3.5 Hz, 1H), 6.82 (dd, <i>J</i> = 3.4, 1.1 Hz, 1H), 4.45 – 4.20 (m, 2H), 3.32 (m, 1H), 2.82 (m, 2H), 2.39 – 2.22 (m, 2H), 2.13 (m, 1H), 1.99-1.93 (m, 2H), 1.78 (td, <i>J</i> = 5.8, 1.9 Hz, 1H), 1.38 (d, <i>J</i> = 9.9 Hz, 1H), 1.23 (t, <i>J</i> = 7.5 Hz, 3H), 1.20 (s, 3H), 1.09 (d, <i>J</i> = 7.1 Hz, 3H), 0.86 (s, 3H). <sup>13</sup>C NMR (126 MHz, DMSO) δ 149.09, 130.69, 130.03, 123.79, 54.55, 46.96, 42.49, 40.28, 38.36, 31.82, 30.65, 27.22, 23.14, 22.74, 20.53, 15.93. HRMS: <i>m/z</i> (M + H<sup>+</sup>): calculated, 278.19, found, 278.19360. HPLC: solvent, H<sub>2</sub>O (0.1 % HCOOH), flow rate, 0.8 mL/min, retention time 6.51 min, purity 99.31 %.</p> |



|                                                                                                               |                                                                                                                                                                                                                                                                                                                                                                                                                                                                                                                                                                                                                                                                                                                                                                                                                                                                                                                                                            |
|---------------------------------------------------------------------------------------------------------------|------------------------------------------------------------------------------------------------------------------------------------------------------------------------------------------------------------------------------------------------------------------------------------------------------------------------------------------------------------------------------------------------------------------------------------------------------------------------------------------------------------------------------------------------------------------------------------------------------------------------------------------------------------------------------------------------------------------------------------------------------------------------------------------------------------------------------------------------------------------------------------------------------------------------------------------------------------|
| 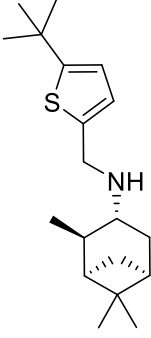 <p>Compound <b>39</b></p>   | <p>(1R,2R,3R,5S)-N-((5-(tert-butyl) thiophen-2-yl) methyl)-2,6,6-trimethyl bicyclo [3.1.1] heptan-3-amine (<b>39</b>. HCl). Method E. 71%. <sup>1</sup>H NMR (400 MHz, DMSO-<i>d</i><sub>6</sub>) δ 9.57 (br s, 1H), 9.17 (br s, 1H), 7.21 (d, <i>J</i> = 3.6 Hz, 1H), 6.86 (d, <i>J</i> = 3.6 Hz, 1H), 4.42 – 4.20 (m, 2H), 3.35 (m, 1H), 2.40 – 2.21 (m, 2H), 2.14 (m, 1H), 1.99-1.94 (m, 2H), 1.82 – 1.75 (m, 1H), 1.39 (d, <i>J</i> = 9.9 Hz, 1H), 1.34 (s, 9H), 1.20 (s, 3H), 1.10 (d, <i>J</i> = 7.1 Hz, 3H), 0.87 (s, 3H). <sup>13</sup>C NMR (126 MHz, DMSO) δ 158.83, 130.42, 129.70, 121.78, 54.85, 47.00, 42.63, 40.29, 39.77, 38.37, 34.20, 32.10, 31.78, 30.71, 27.24, 23.10, 20.56. HRMS: <i>m/z</i> (M + H<sup>+</sup>): calculated, 306.22, found, 306.22504. HPLC: solvent, H<sub>2</sub>O (0.1 % HCOOH), flow rate, 0.8 mL/min, retention time 6.89 min, purity 99.87 %.</p>                                                             |
|  <p>Compound <b>40</b></p>  | <p>(1R,2R,3R,5S)-2,6,6-trimethyl-N-(5-(methylthio) thiophen-2-yl) methyl bicyclo [3.1.1] heptan-3-amine (<b>40</b>. HCl). Method E. 45%. <sup>1</sup>H NMR (400 MHz, DMSO-<i>d</i><sub>6</sub>) δ 9.70 (s, 1H), 9.29 (s, 1H), 7.30 (d, <i>J</i> = 3.6 Hz, 1H), 7.08 (d, <i>J</i> = 3.6 Hz, 1H), 4.34 (m, 2H), 3.31 (m, 1H), 2.50 (s, 3H), 2.34 – 2.31 (m, 2H), 2.14 (m, 1H), 1.98 – 1.94 (m, 2H), 1.84 – 1.71 (m, 1H), 1.39 (d, <i>J</i> = 9.8 Hz, 1H), 1.19 (s, 3H), 1.10 (d, <i>J</i> = 7.0 Hz, 3H), 0.86 (s, 3H). <sup>13</sup>C NMR (126 MHz, DMSO) δ 138.99, 134.42, 131.58, 129.70, 54.82, 46.98, 42.43, 40.29, 39.81, 38.39, 31.81, 30.67, 27.23, 23.19, 20.77, 20.59. HRMS: <i>m/z</i> (M + H<sup>+</sup>): calculated, 296.14, found, 296.15008. HPLC: solvent, H<sub>2</sub>O (0.1 % HCOOH), flow rate, 0.8 mL/min, retention time 6.18 min, purity 98.89 %.</p>                                                                                 |
|  <p>Compound <b>41</b></p> | <p>(1R,2R,3R,5S)-N-((5'-bromo-[2,2'-bithiophen]-5-yl) methyl)-2,6,6-trimethylbicyclo [3.1.1] heptan-3-amine (<b>41</b>. HCl). Method E. 40%. <sup>1</sup>H NMR (400 MHz, DMSO-<i>d</i><sub>6</sub>) δ 9.75 (br s, 1H), 9.34 (br s, 1H), 7.39 (d, <i>J</i> = 3.7 Hz, 1H), 7.29 (d, <i>J</i> = 3.7 Hz, 1H), 7.24 (d, <i>J</i> = 3.9 Hz, 1H), 7.18 (d, <i>J</i> = 3.9 Hz, 1H), 4.39 (m, 2H), 3.35 (m, 1H), 2.40 – 2.21 (m, 2H), 2.16 (m, 1H), 2.06 – 1.90 (m, 2H), 1.84 – 1.71 (m, 1H), 1.40 (d, <i>J</i> = 9.9 Hz, 1H), 1.20 (s, 3H), 1.12 (d, <i>J</i> = 7.0 Hz, 3H), 0.87 (s, 3H). <sup>13</sup>C NMR (126 MHz, DMSO) δ 138.05, 137.44, 133.18, 132.56, 132.12, 125.46, 124.80, 111.08, 55.44, 47.46, 42.80, 40.76, 38.83, 32.26, 31.16, 27.68, 23.65, 21.06. HRMS: <i>m/z</i> (M + H<sup>+</sup>): calculated, 410.05, found, 410.06036. HPLC: solvent, H<sub>2</sub>O (0.1 % HCOOH), flow rate, 0.8 mL/min, retention time 7.23 min, purity 99.73 %.</p> |

# 1H NMR and 13CNMR spectra of Compounds

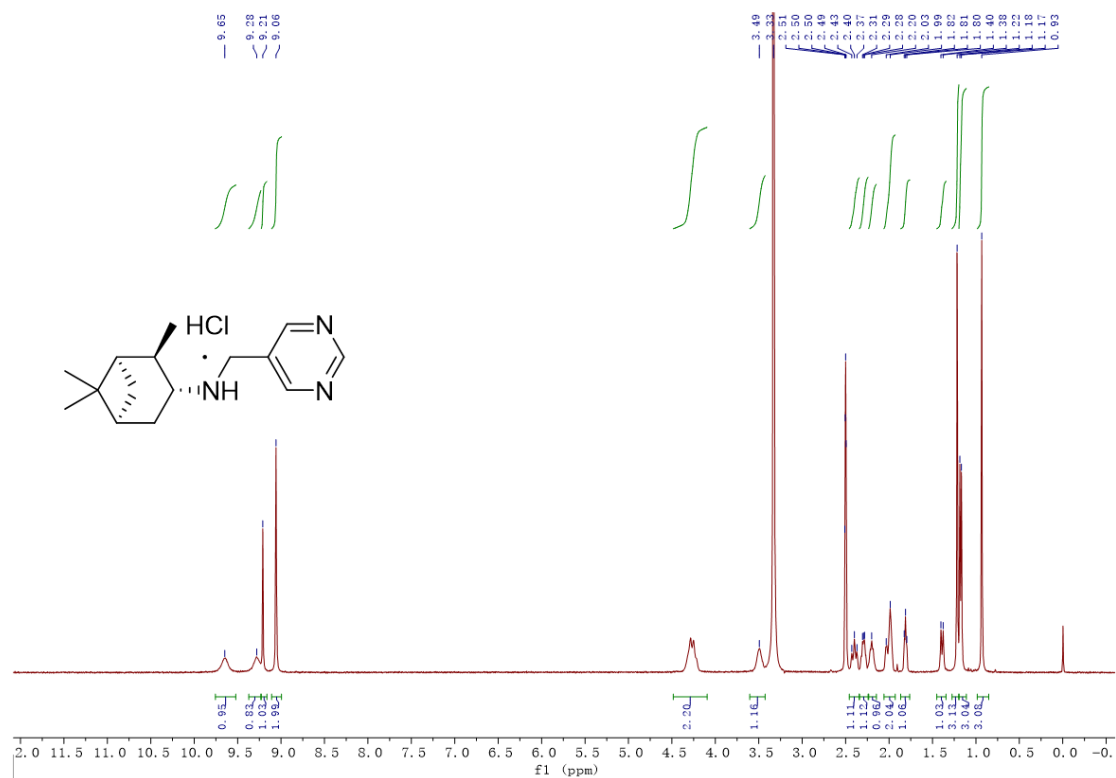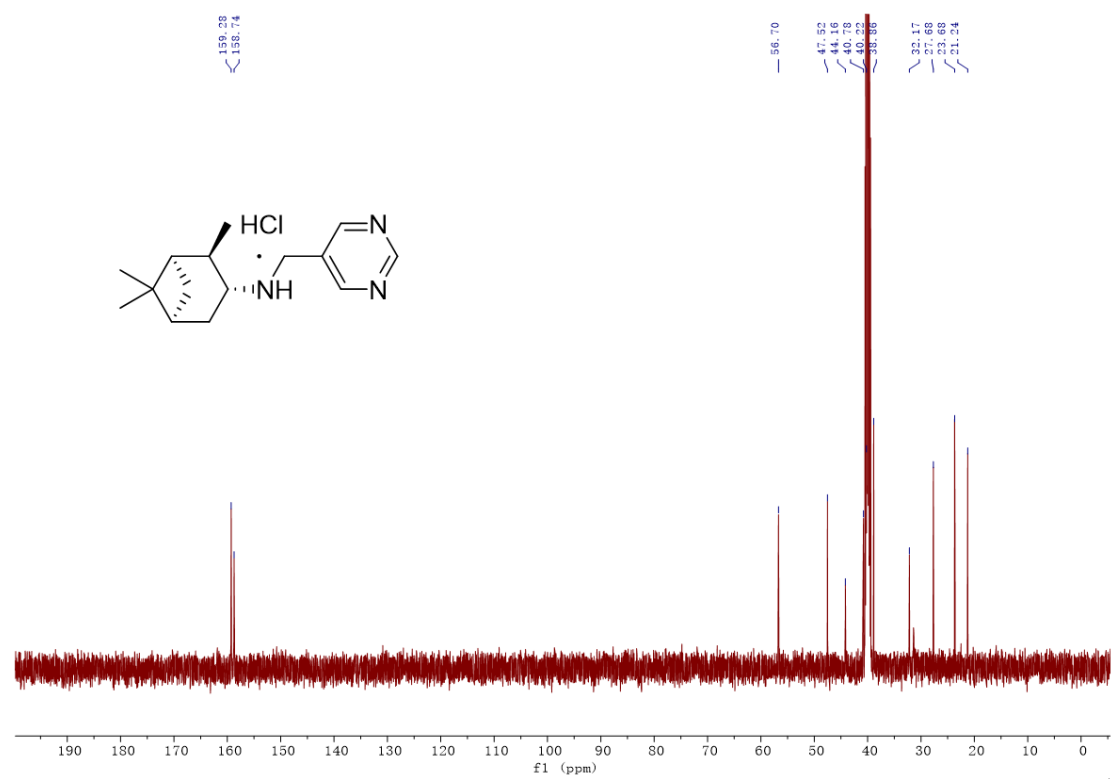

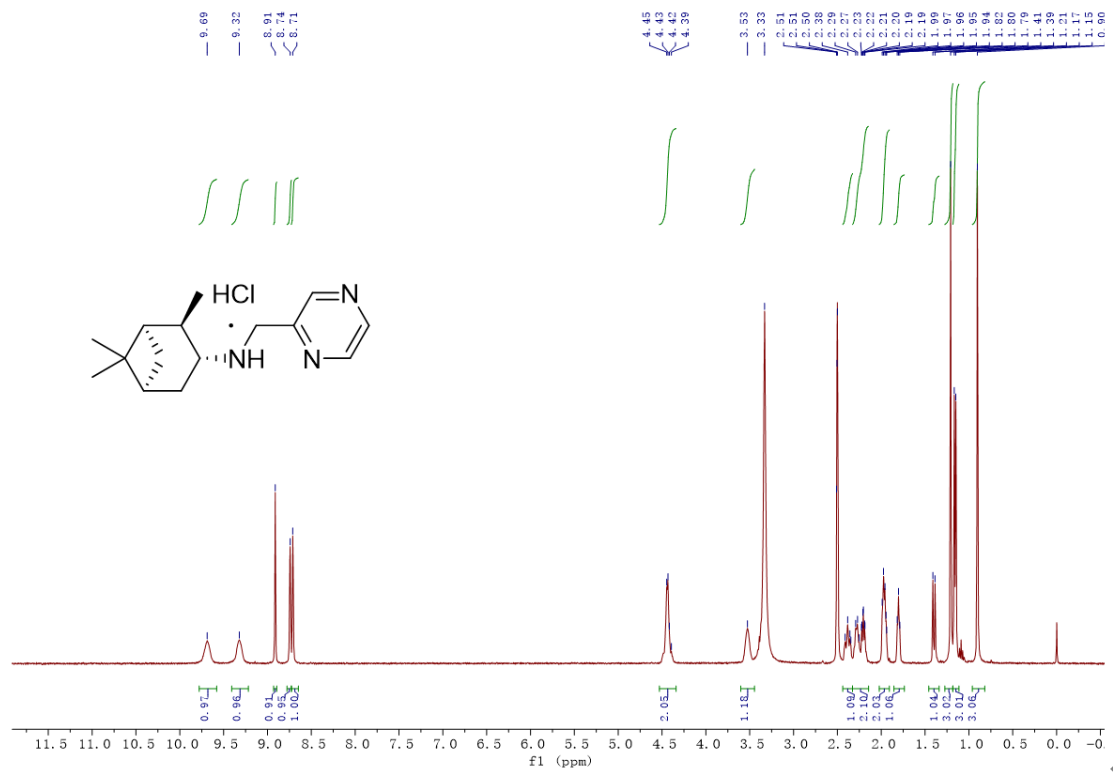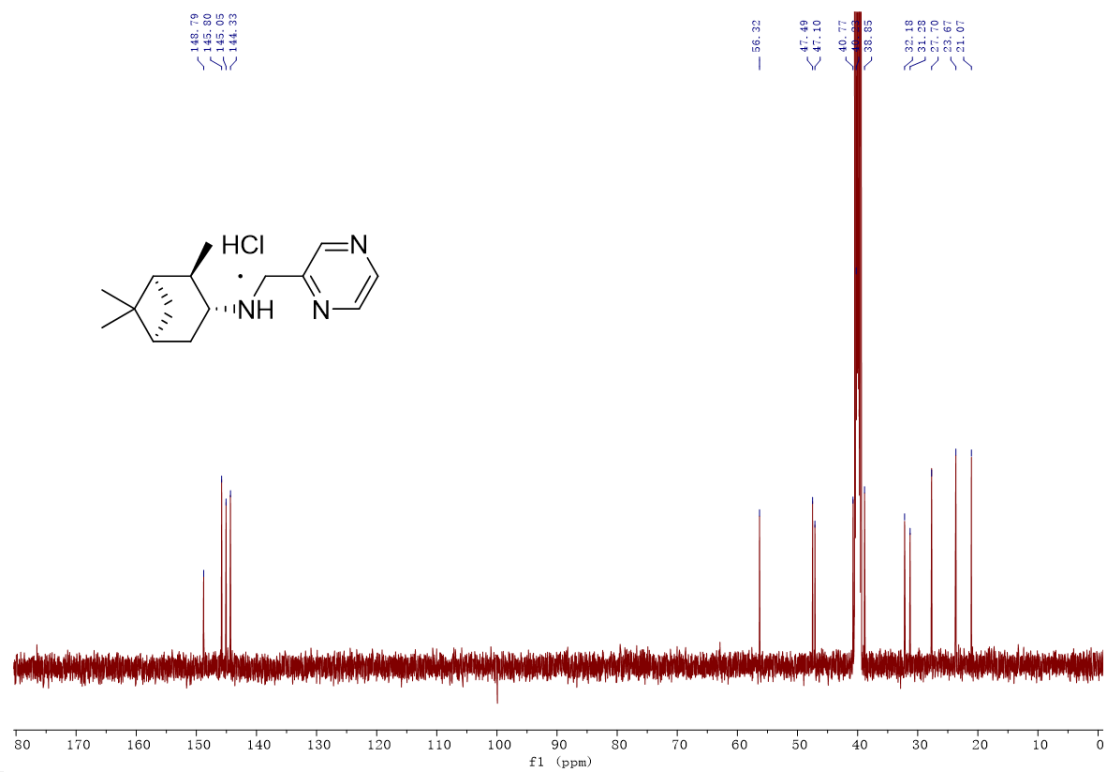

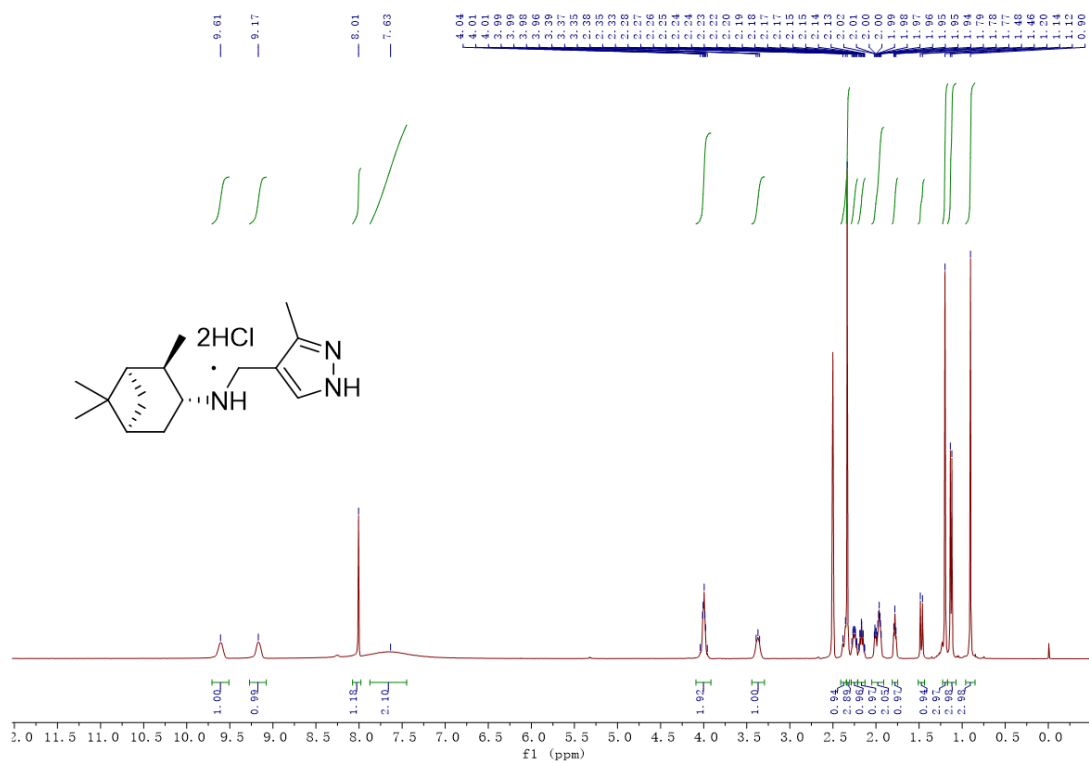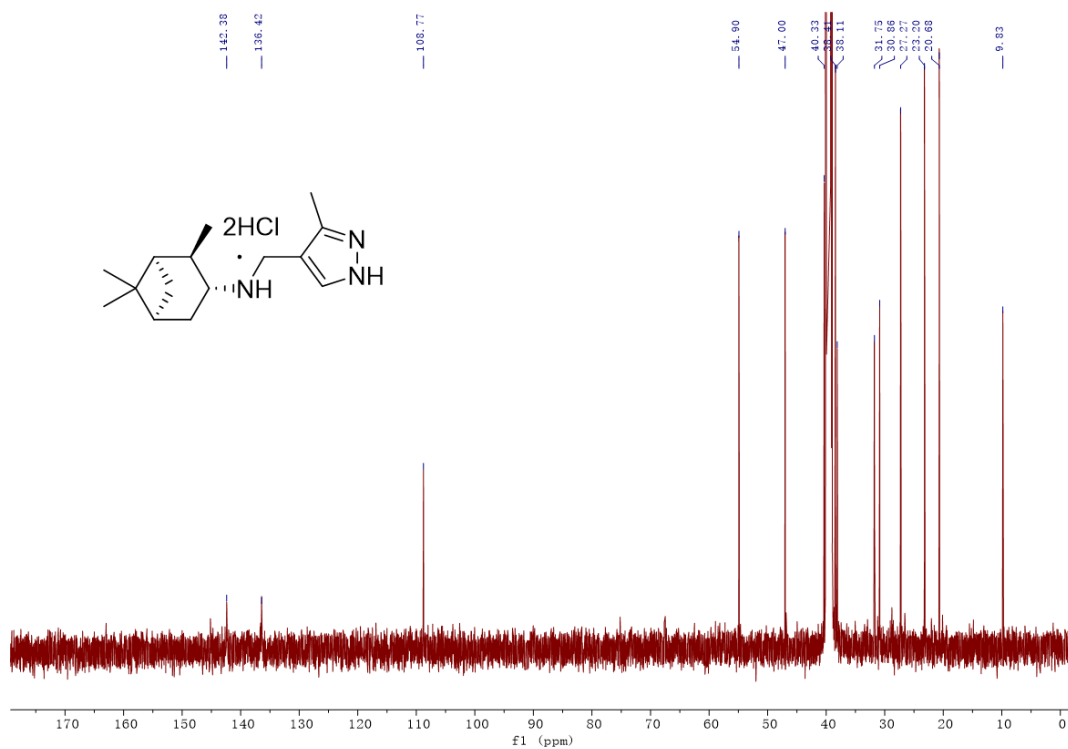

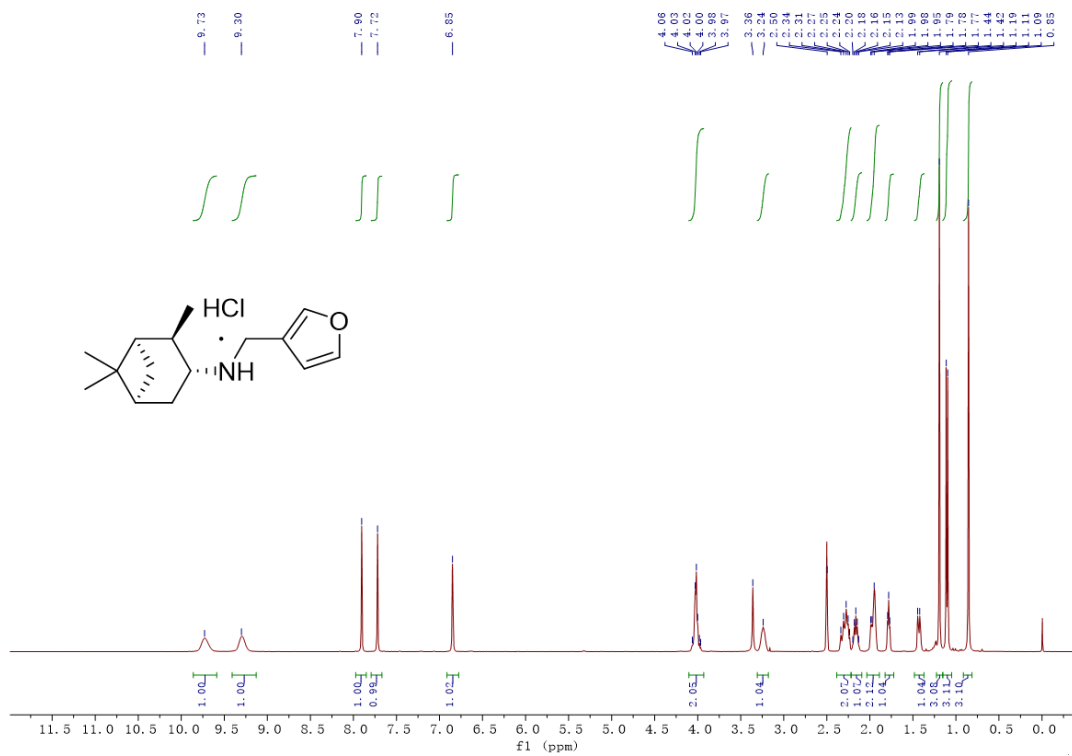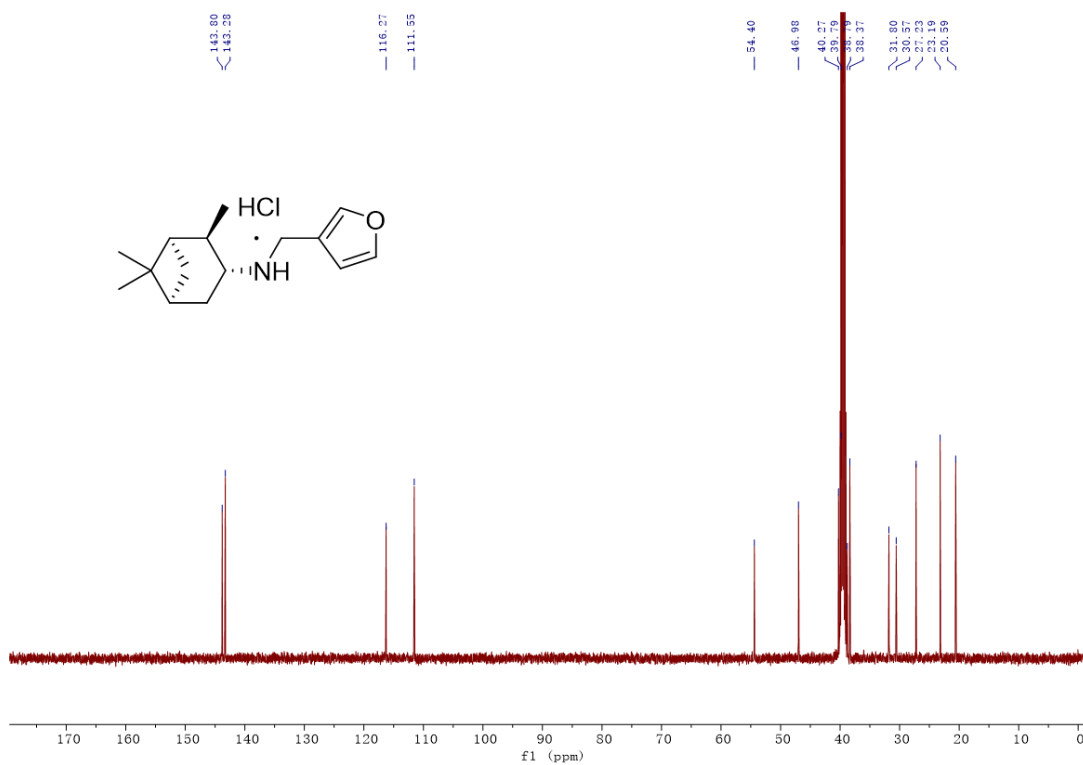

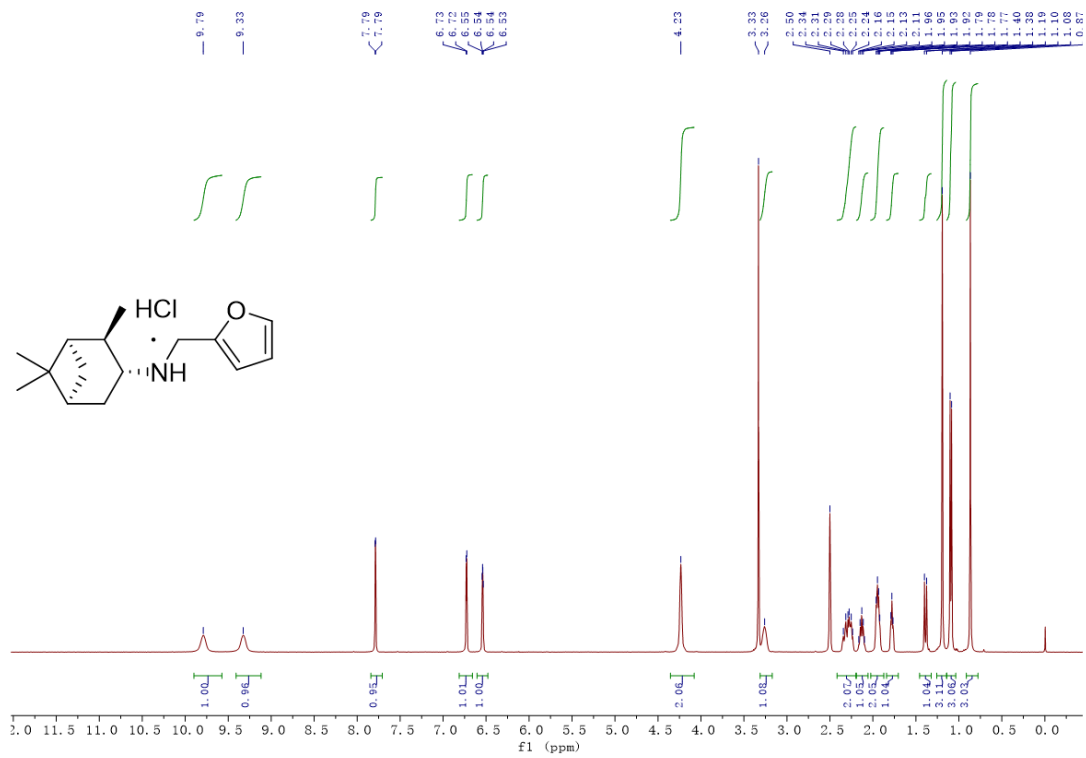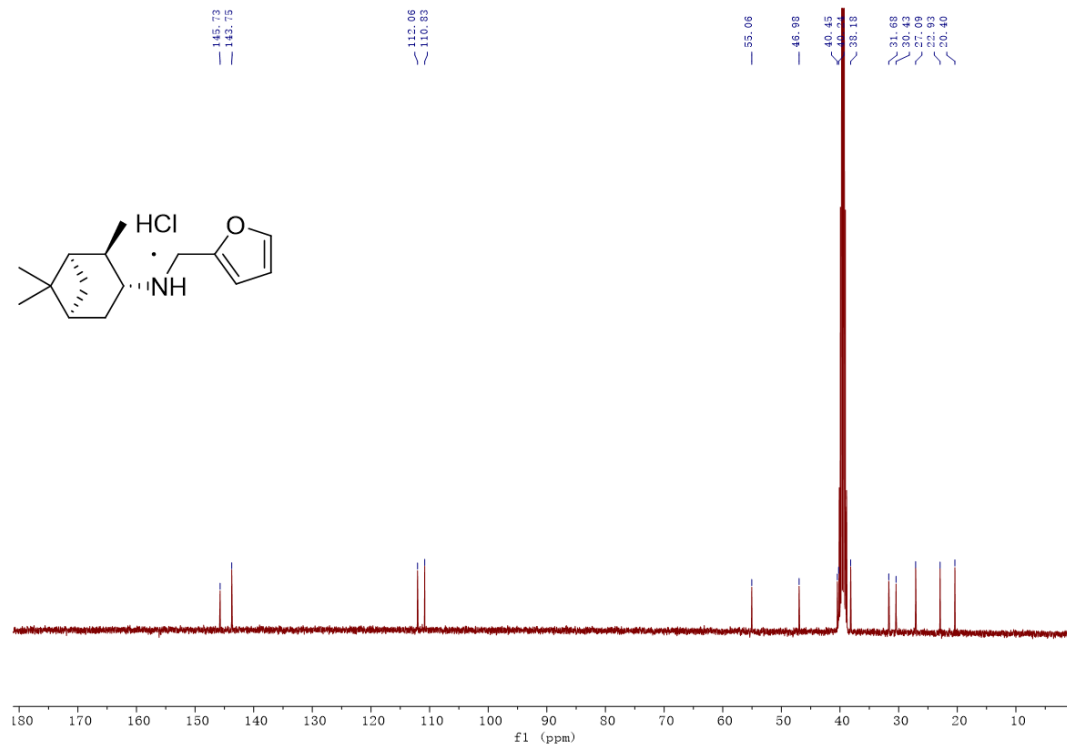

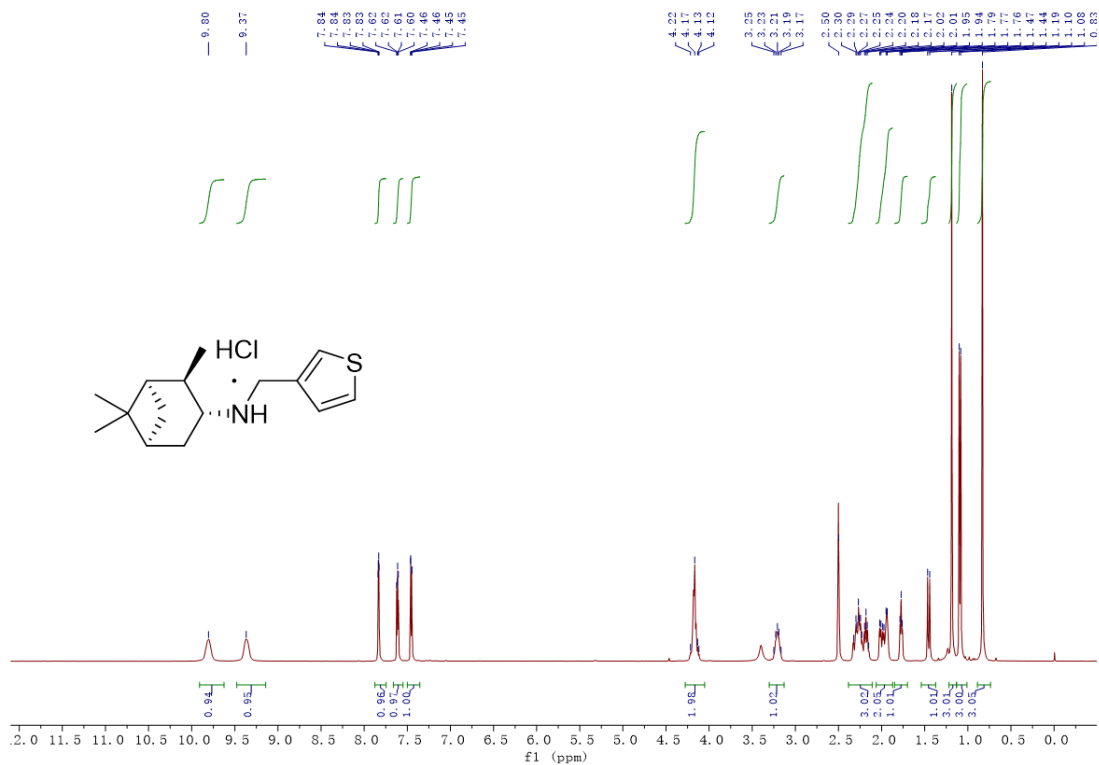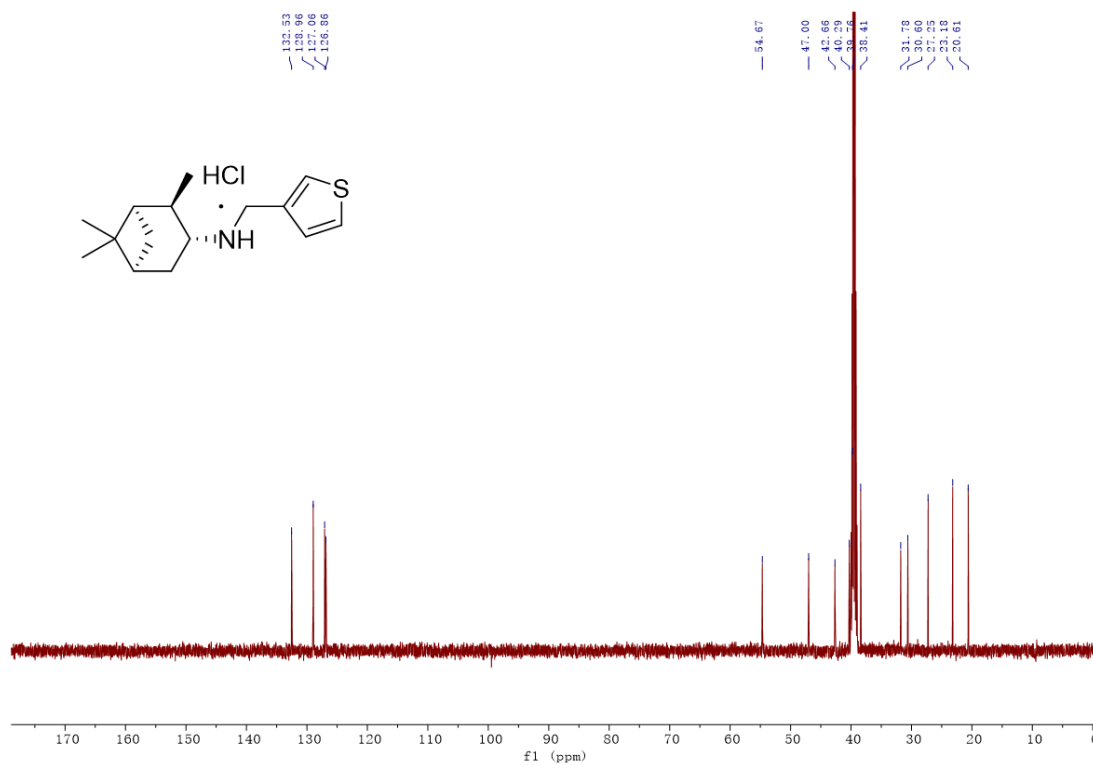



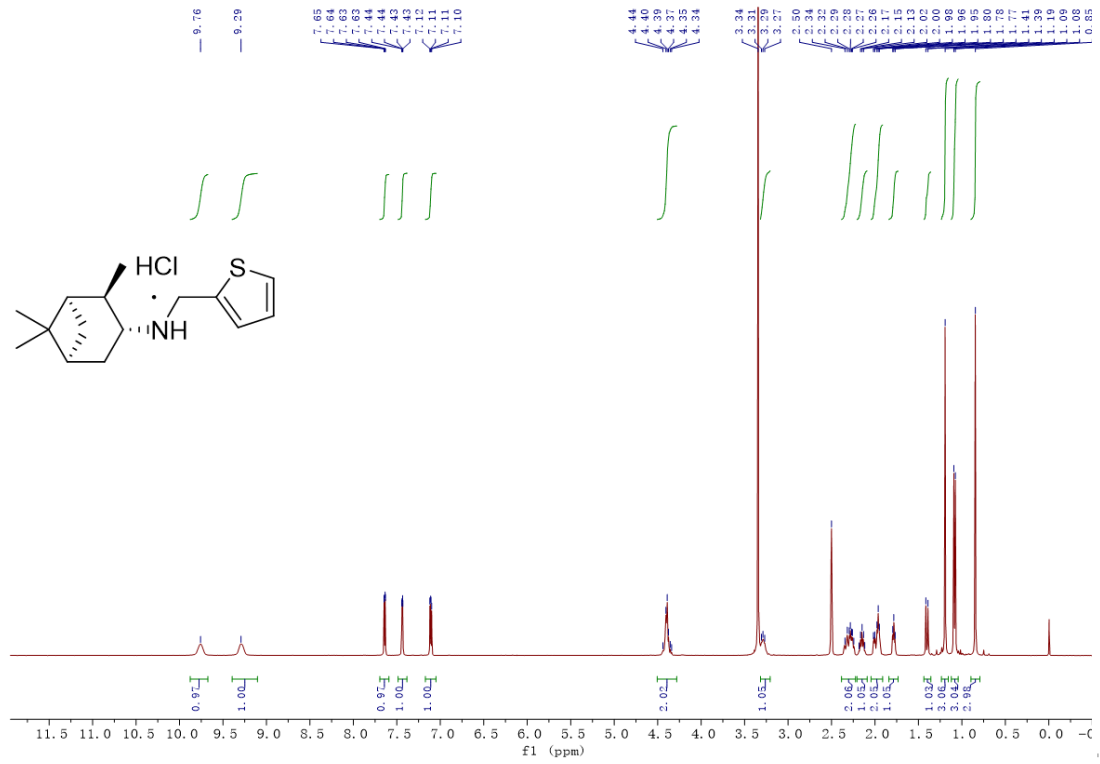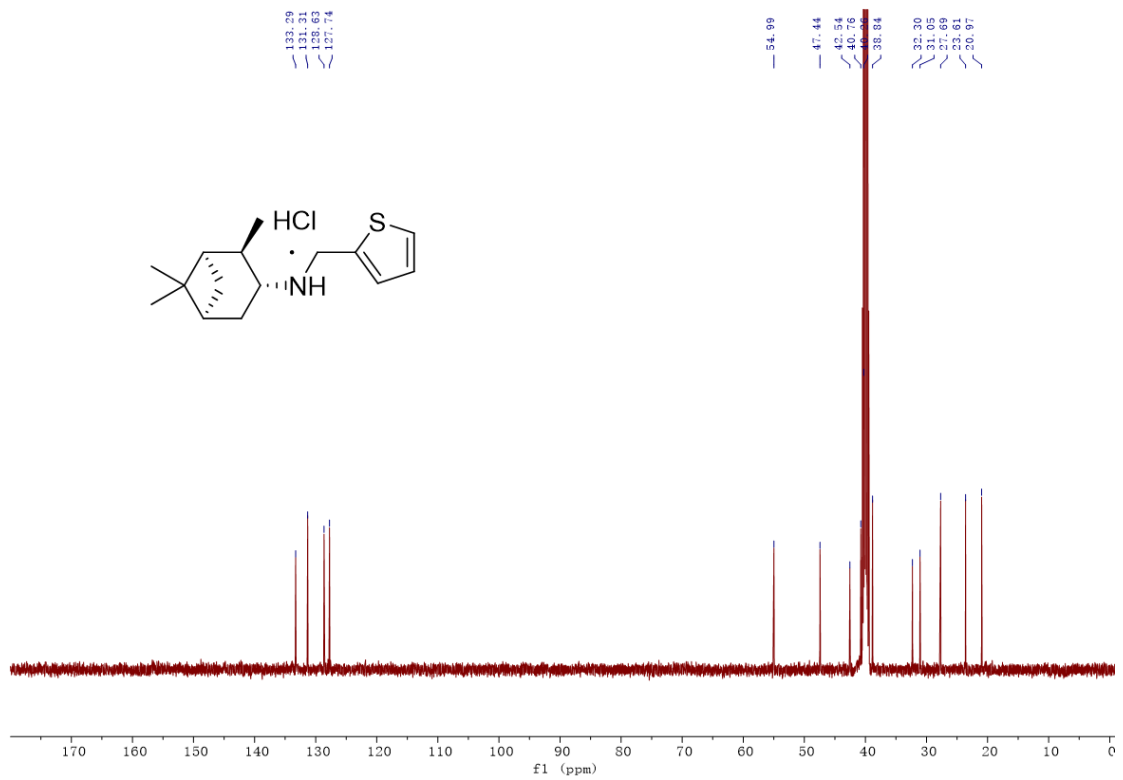

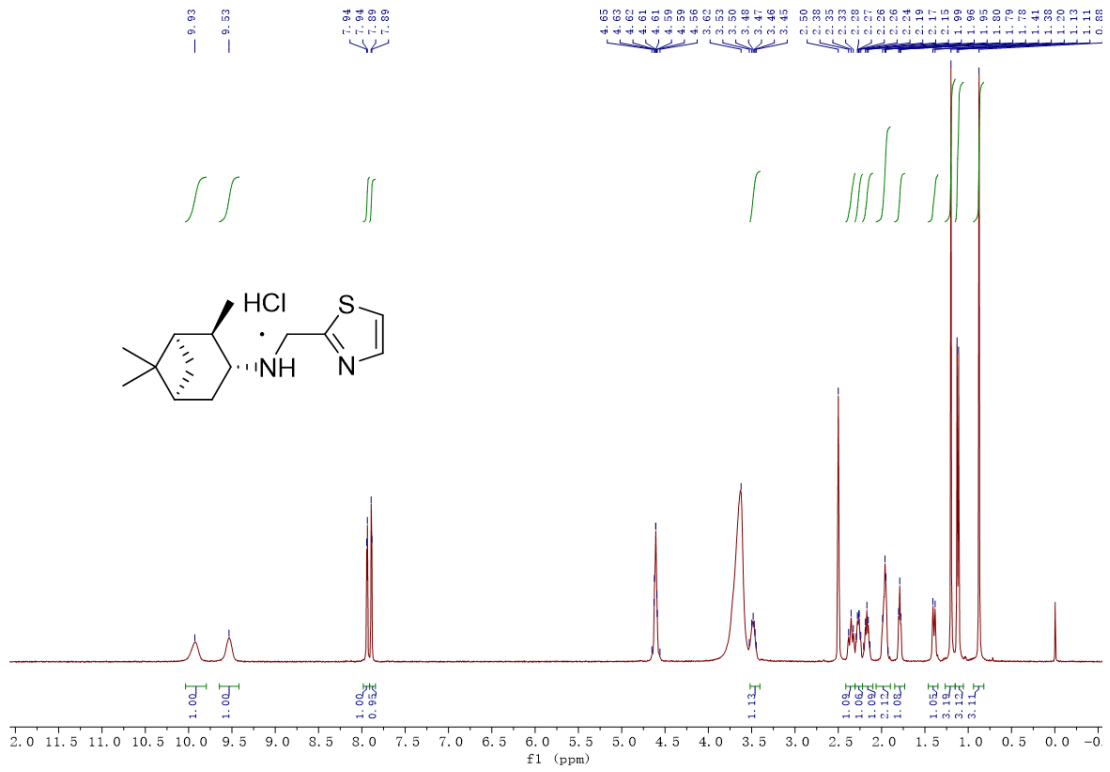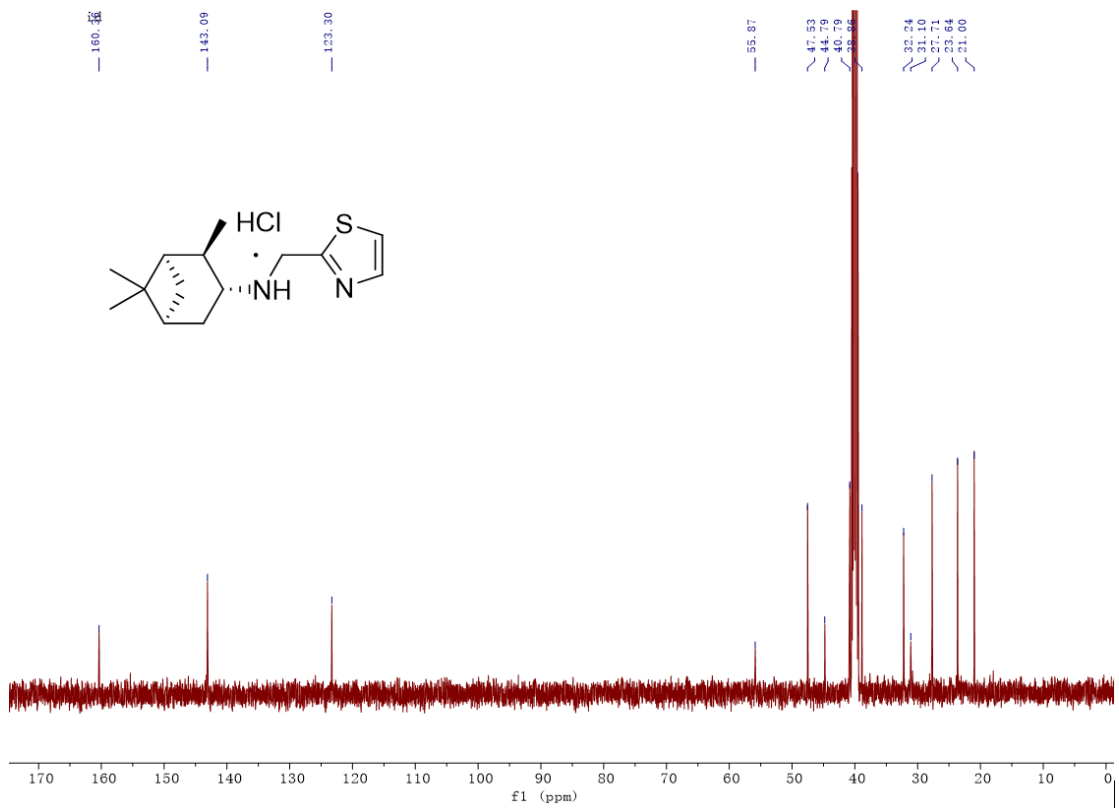

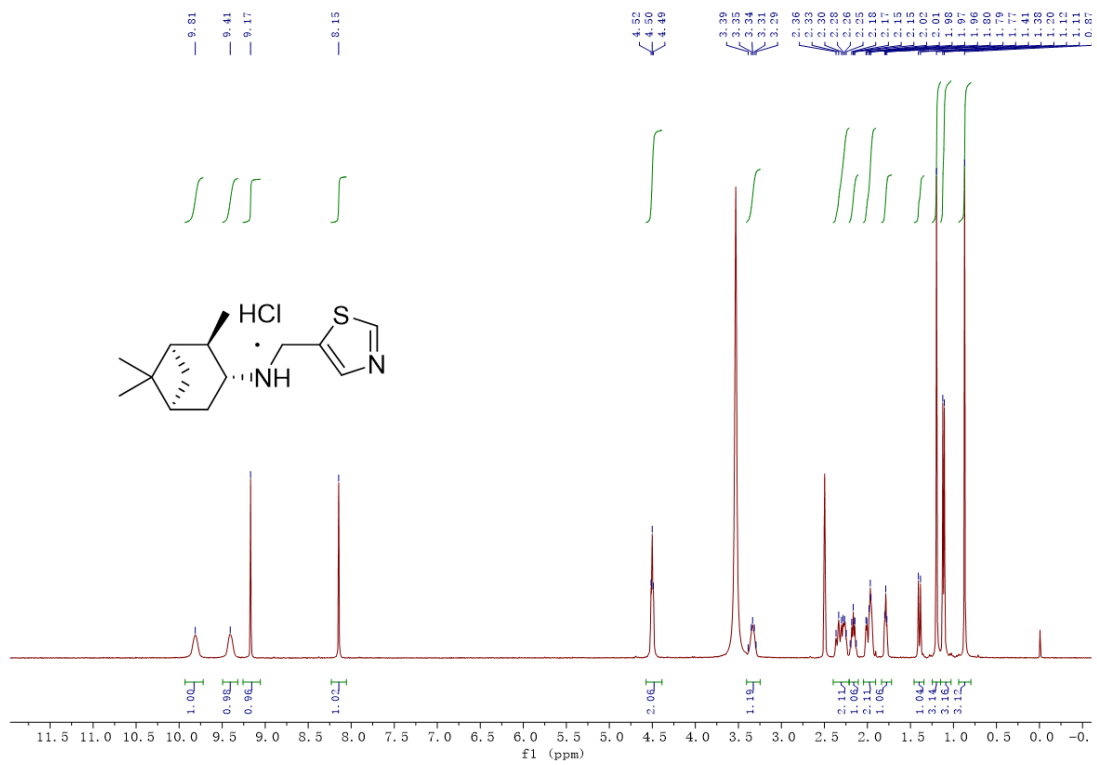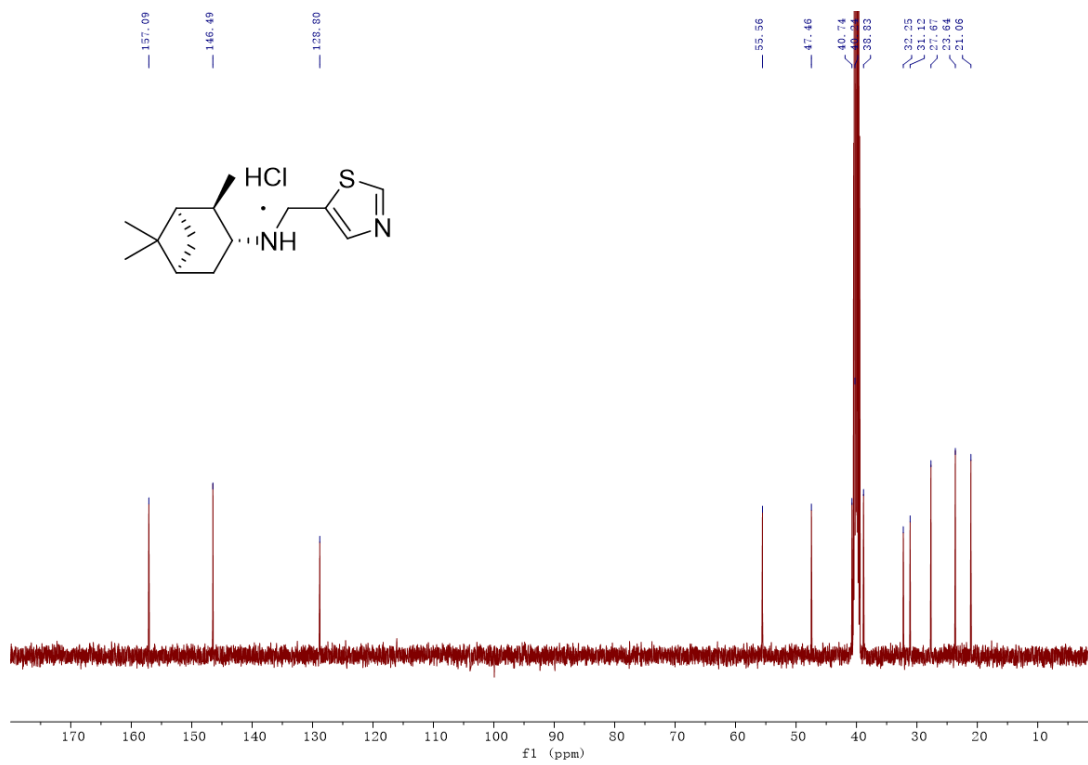



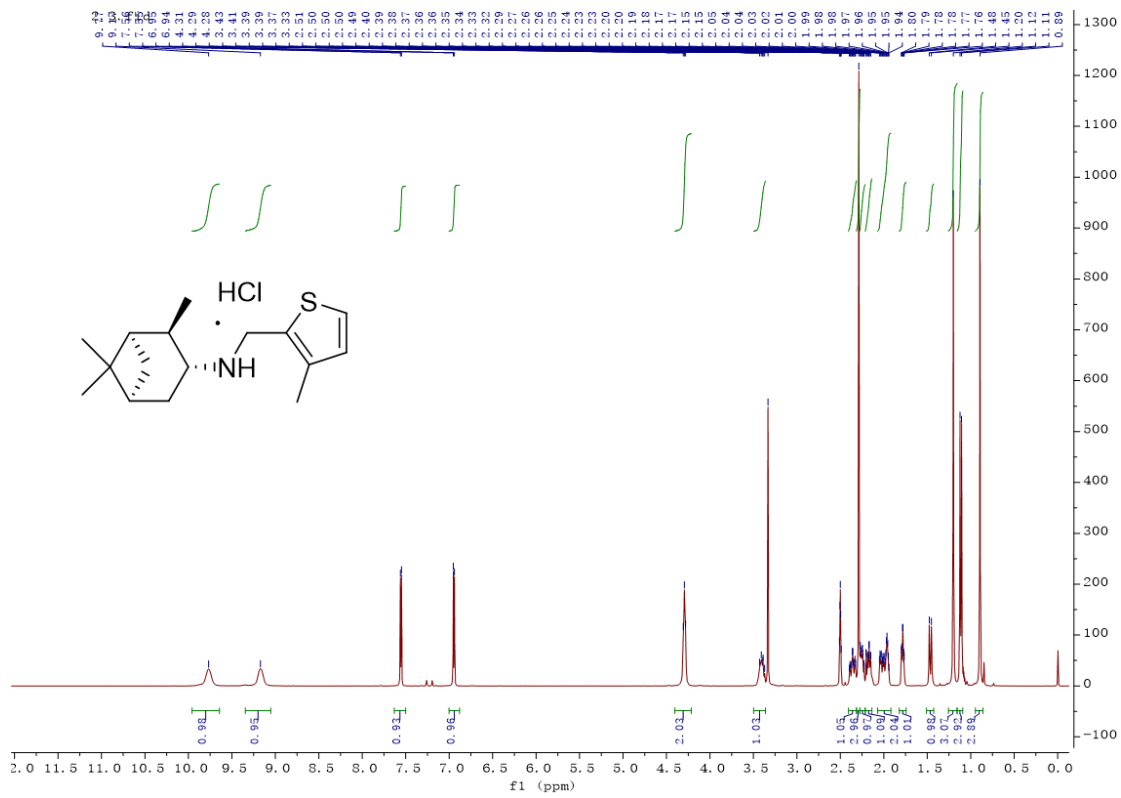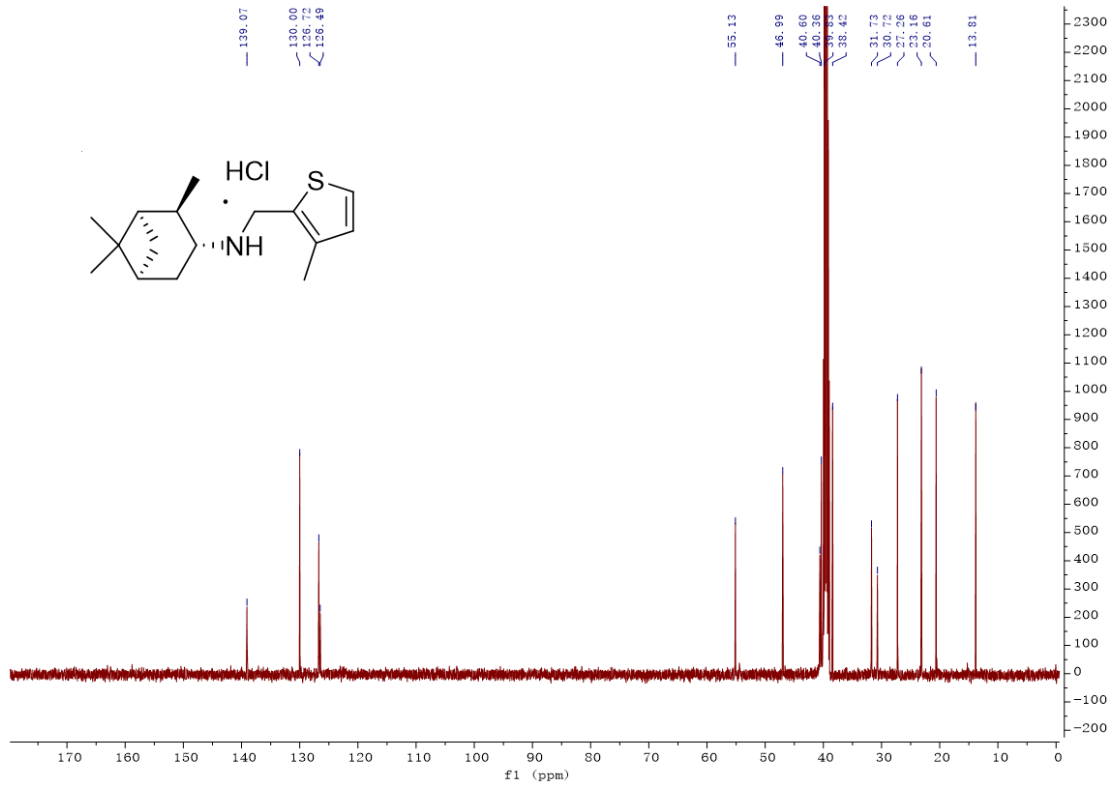

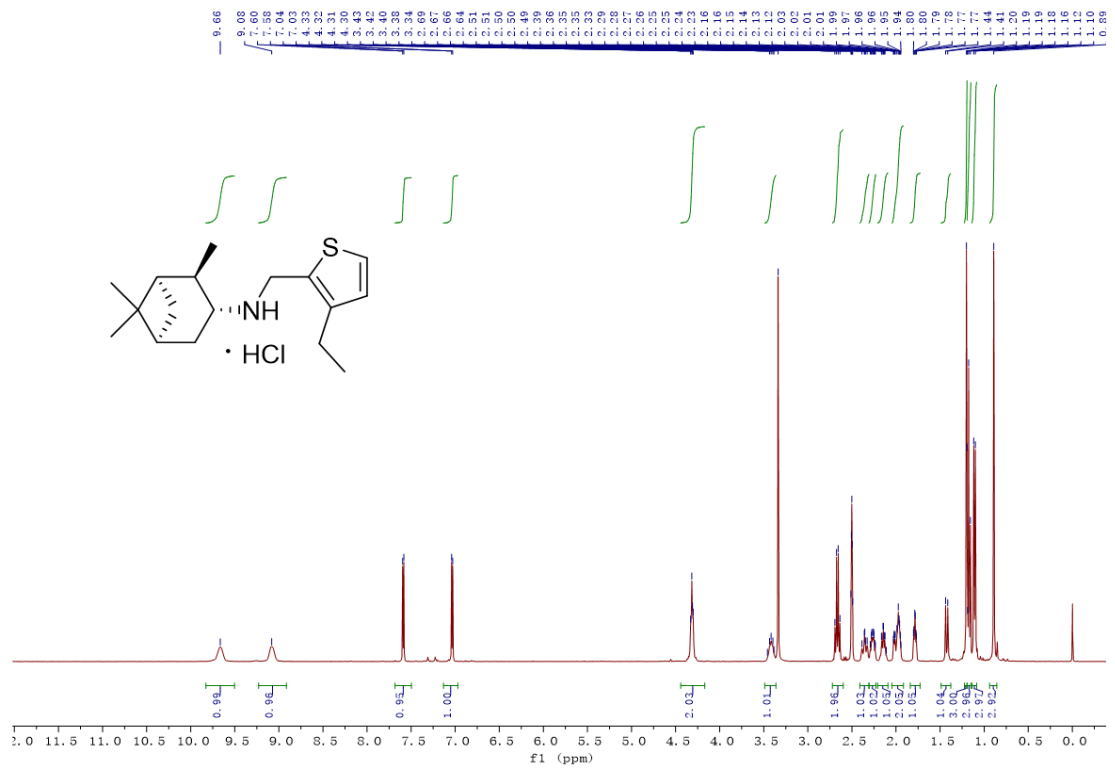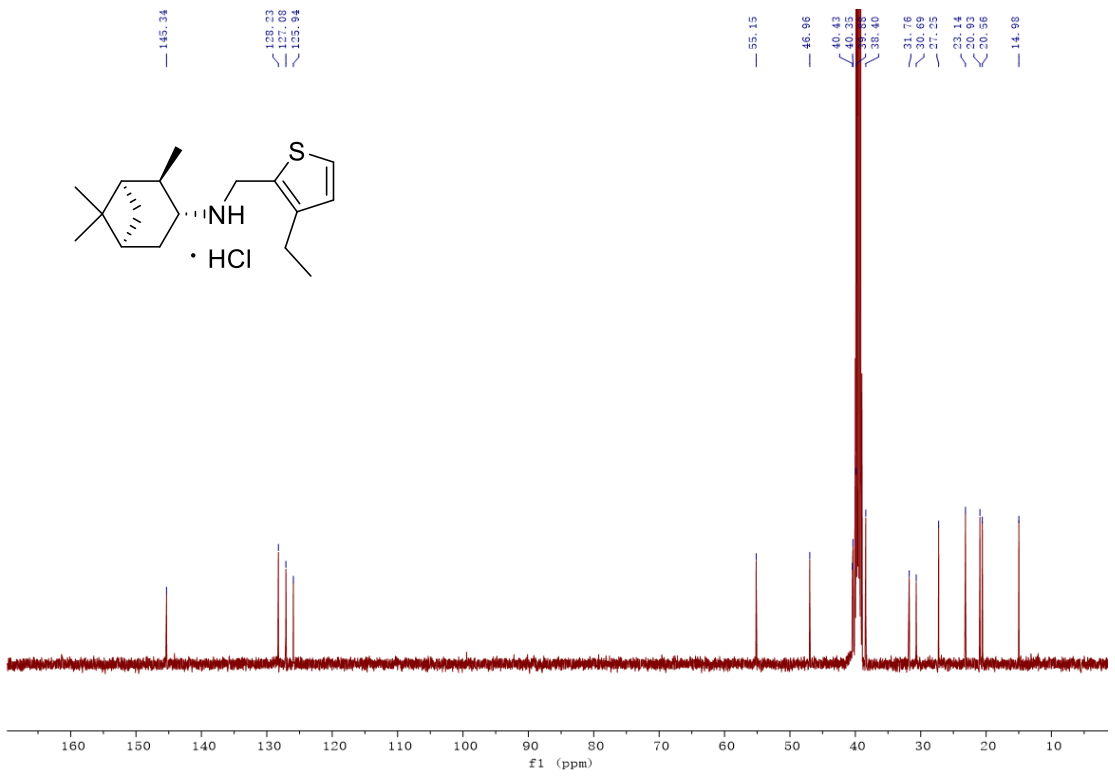

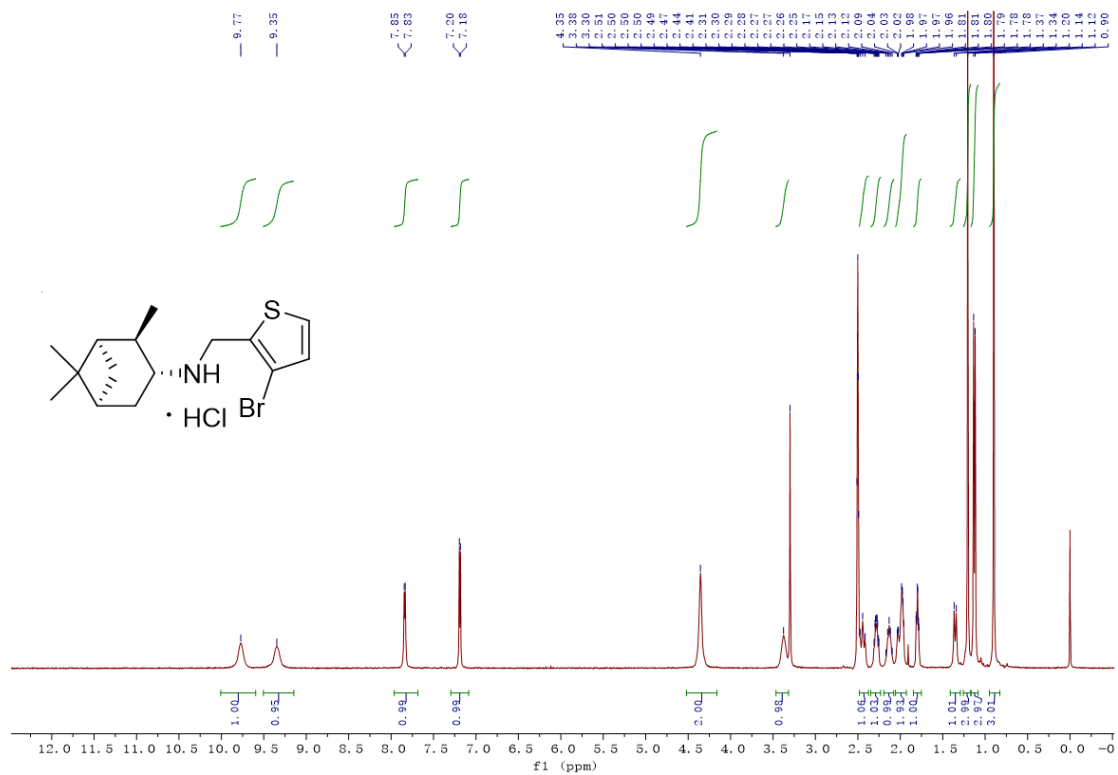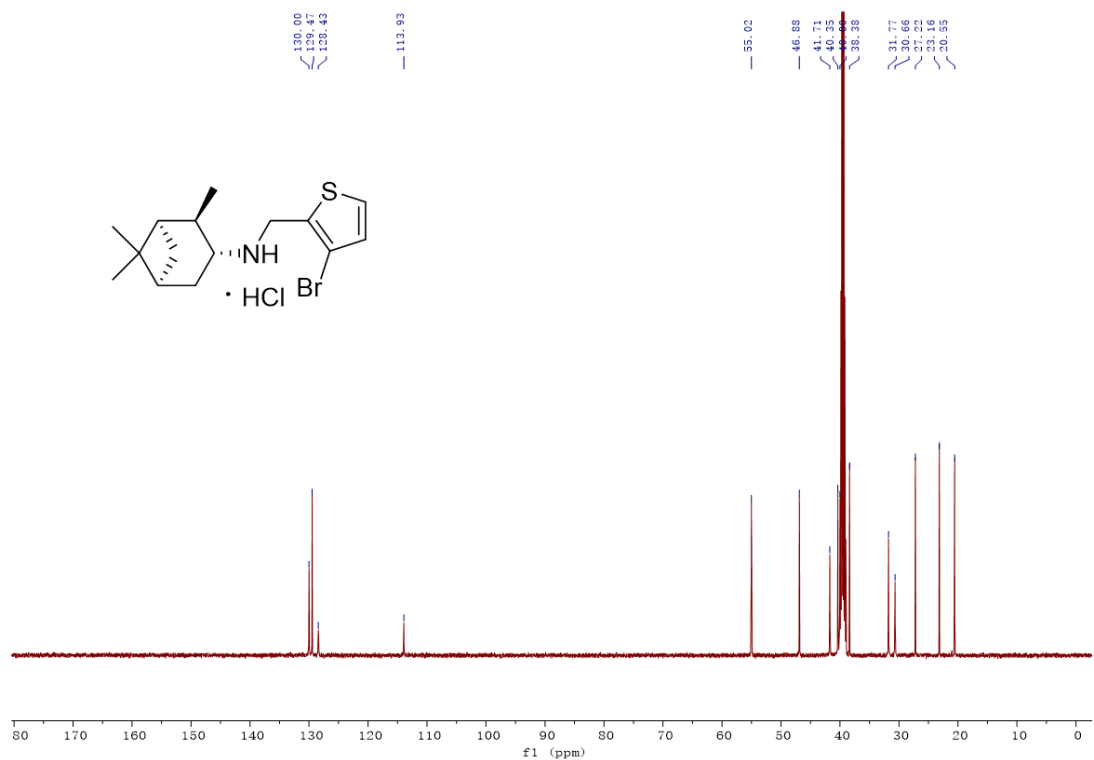



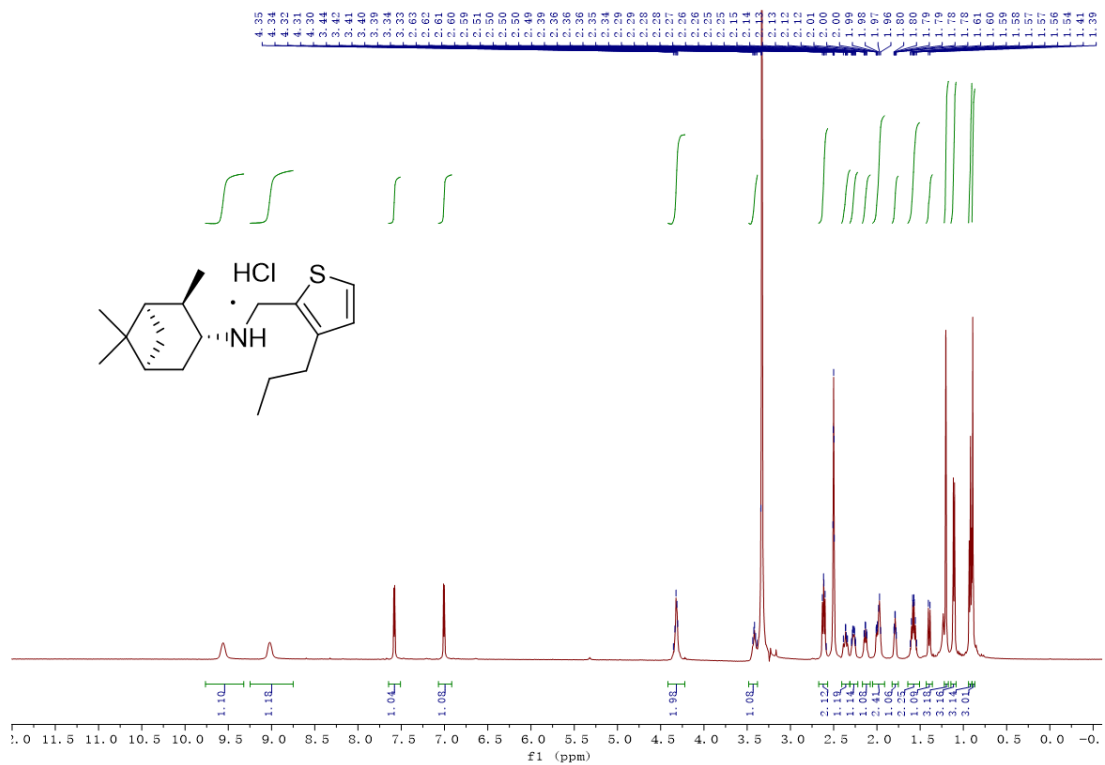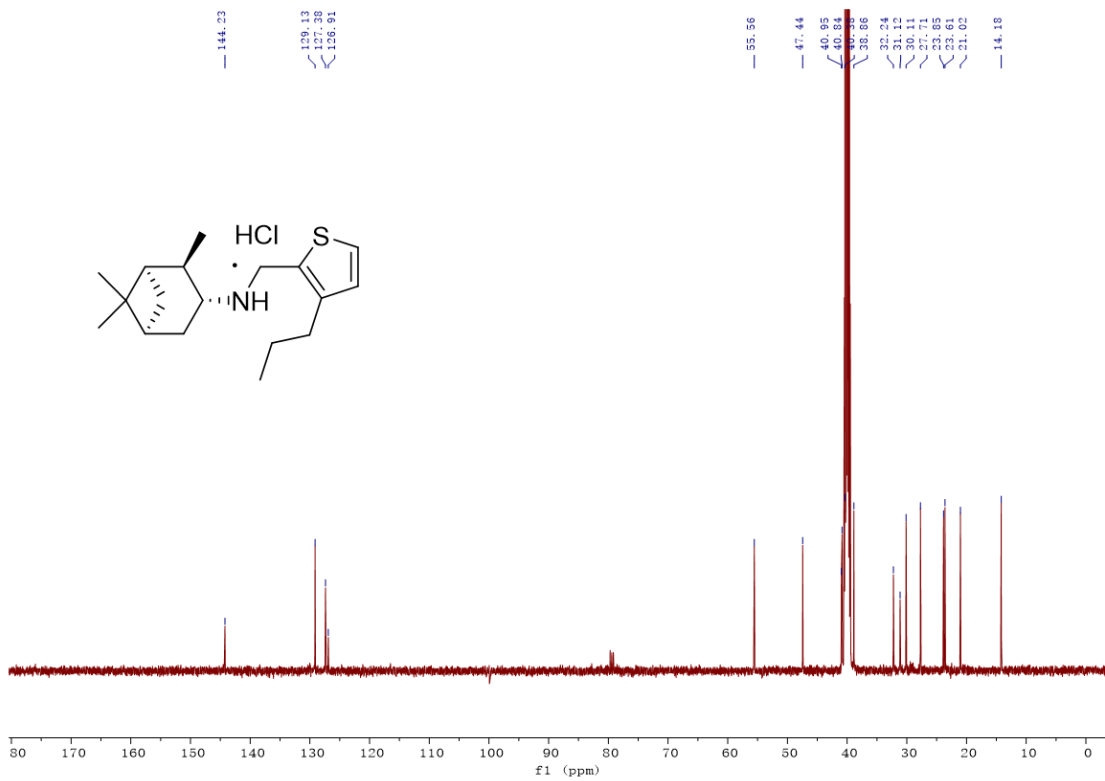

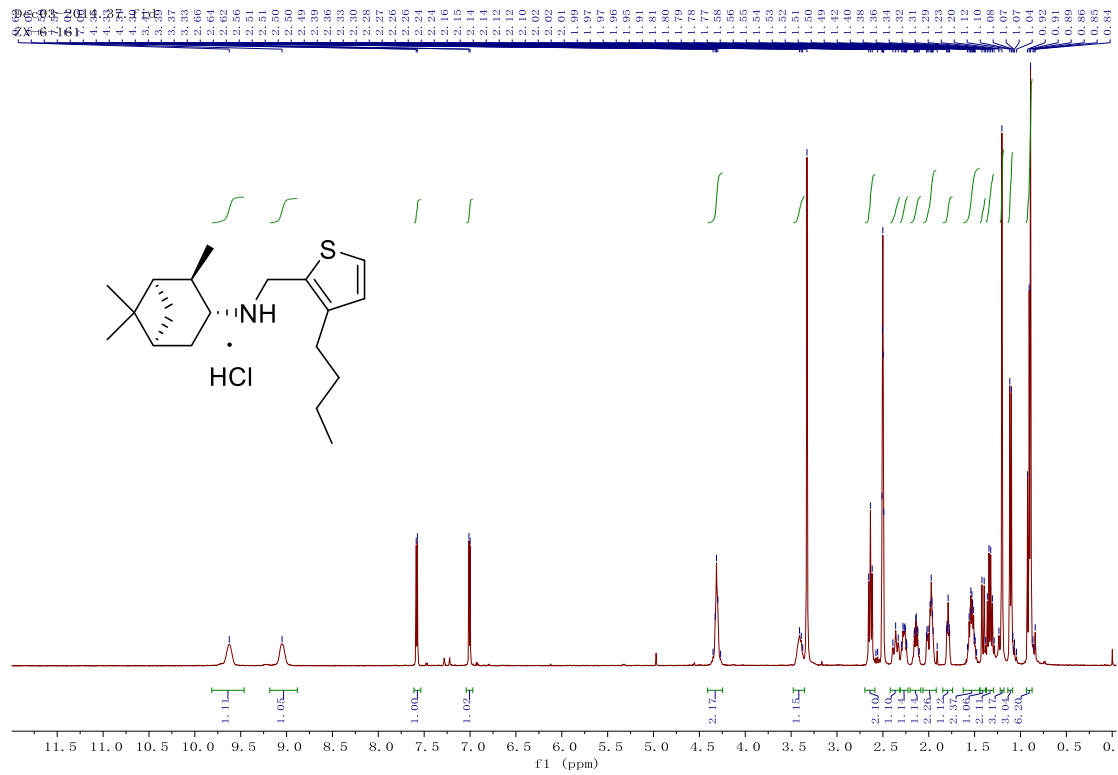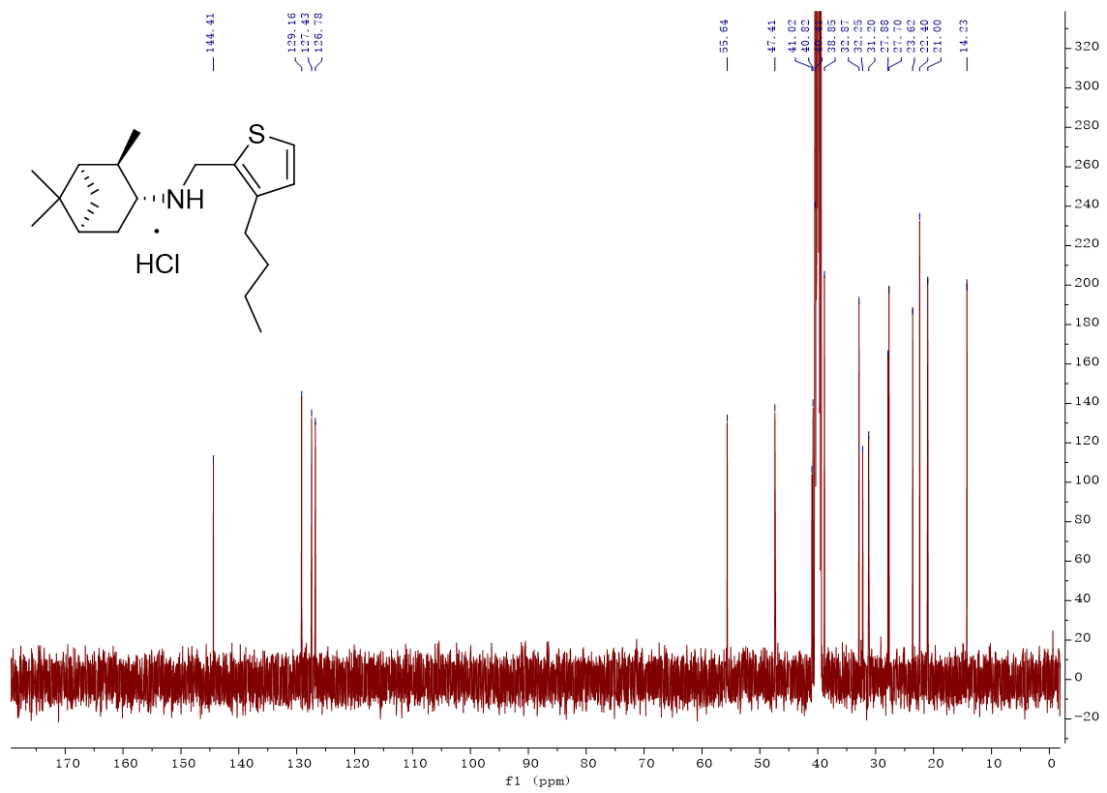

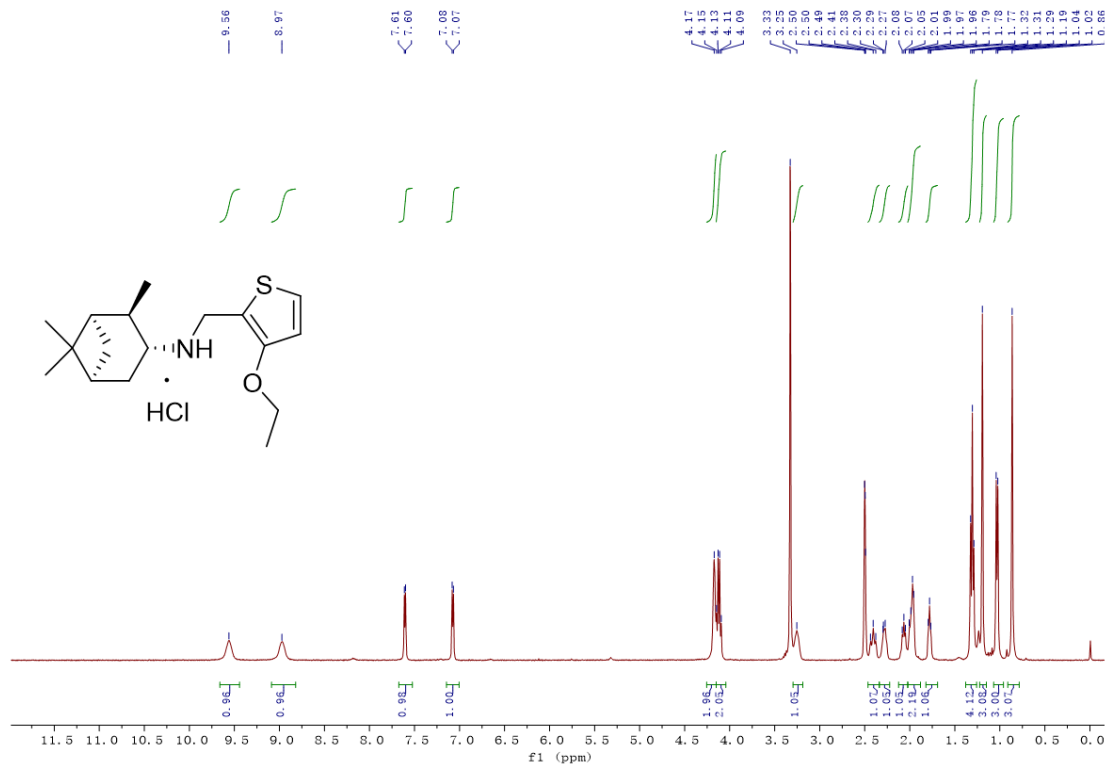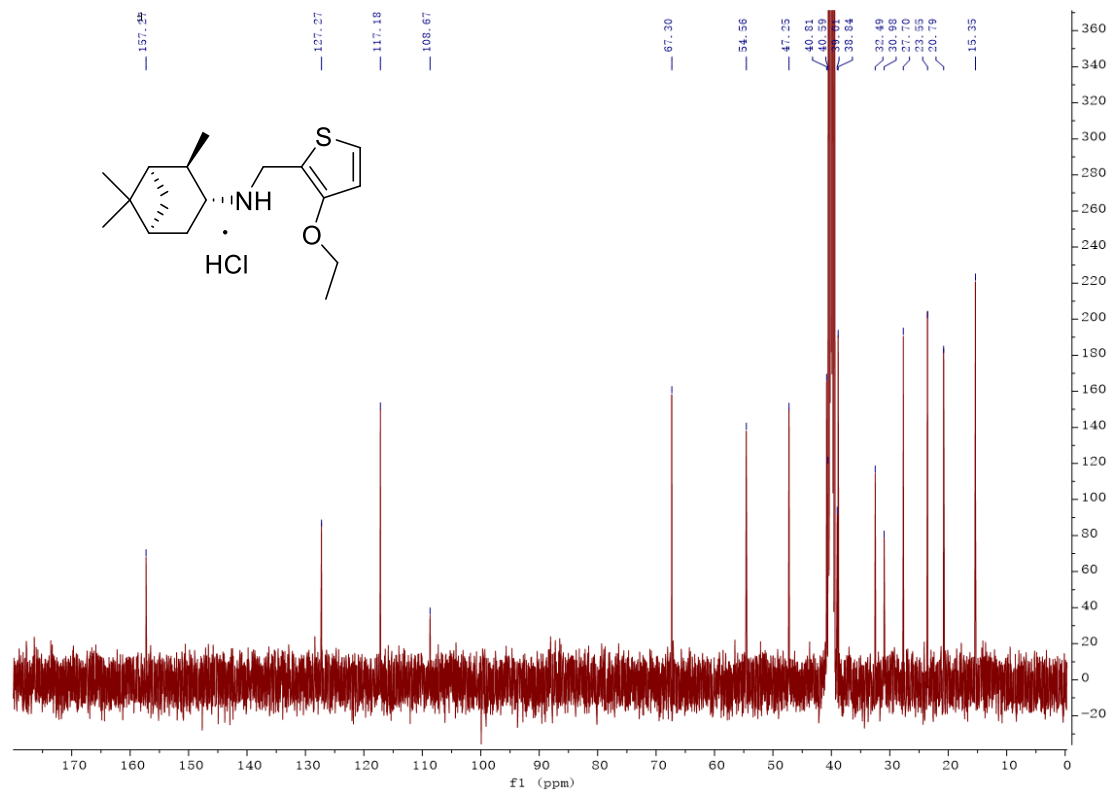



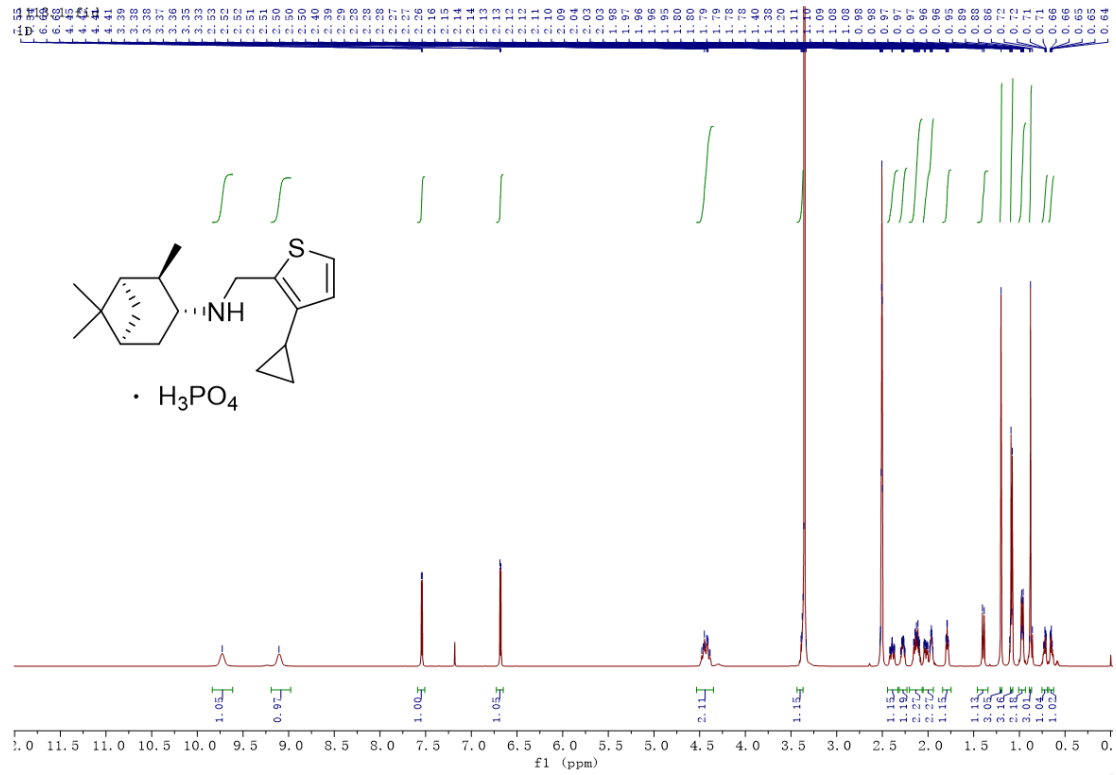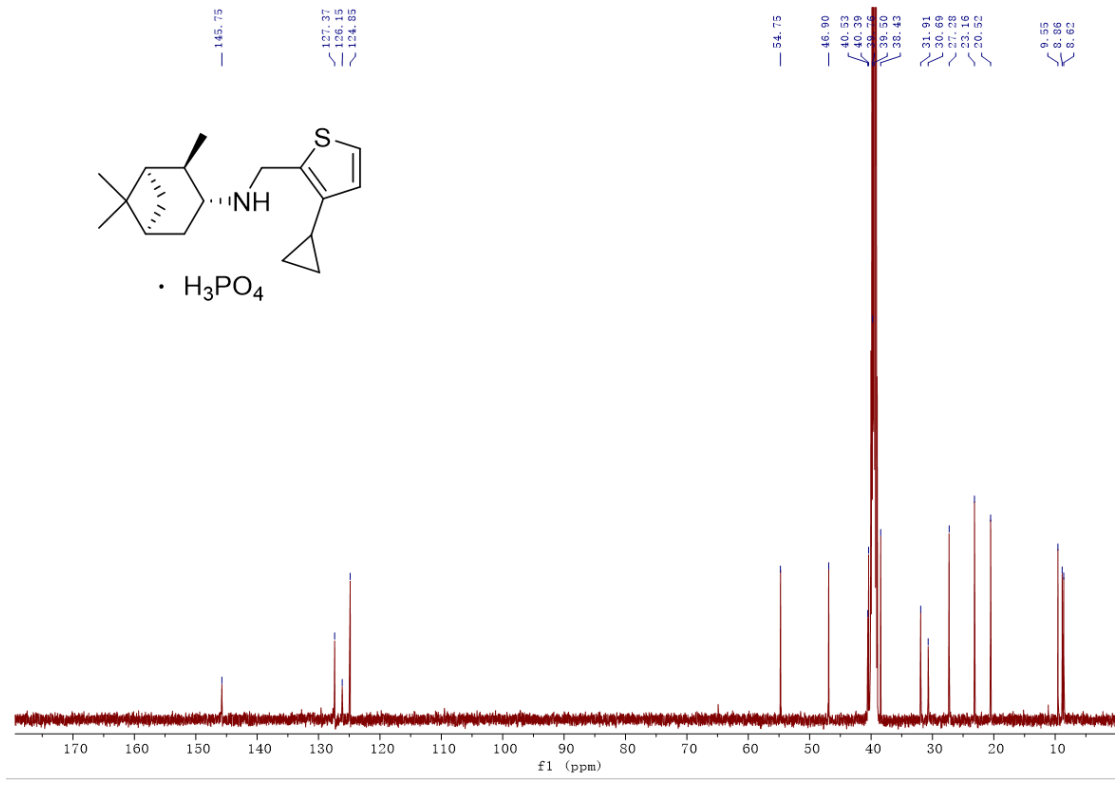

148.60 137.77 136.96 136.35 55.39 47.39 40.83 38.85 38.56 34.97 32.30 32.33 31.04 27.70 25.67 23.58 23.35 23.35

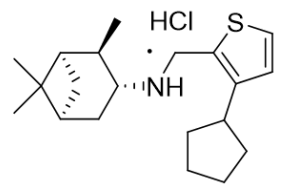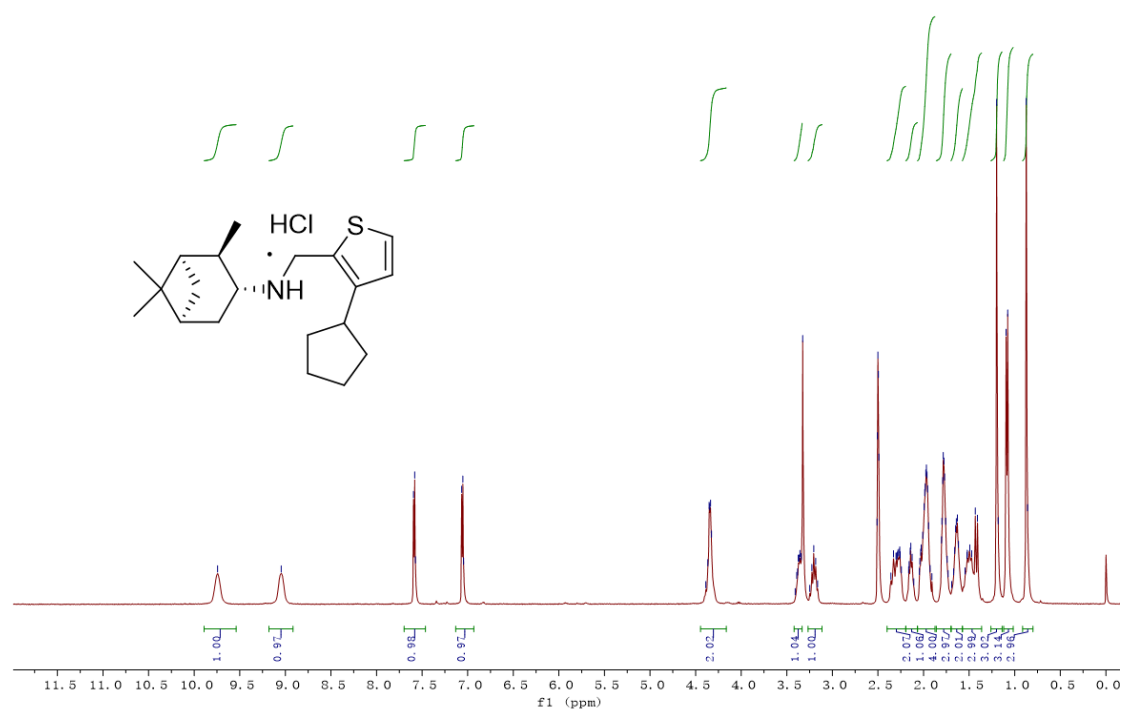

148.60 137.77 136.96 136.35 55.39 47.39 40.83 38.85 38.56 34.97 32.30 32.33 31.04 27.70 25.67 23.58 23.35

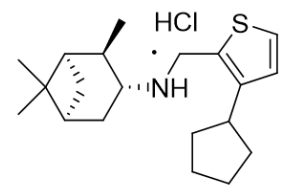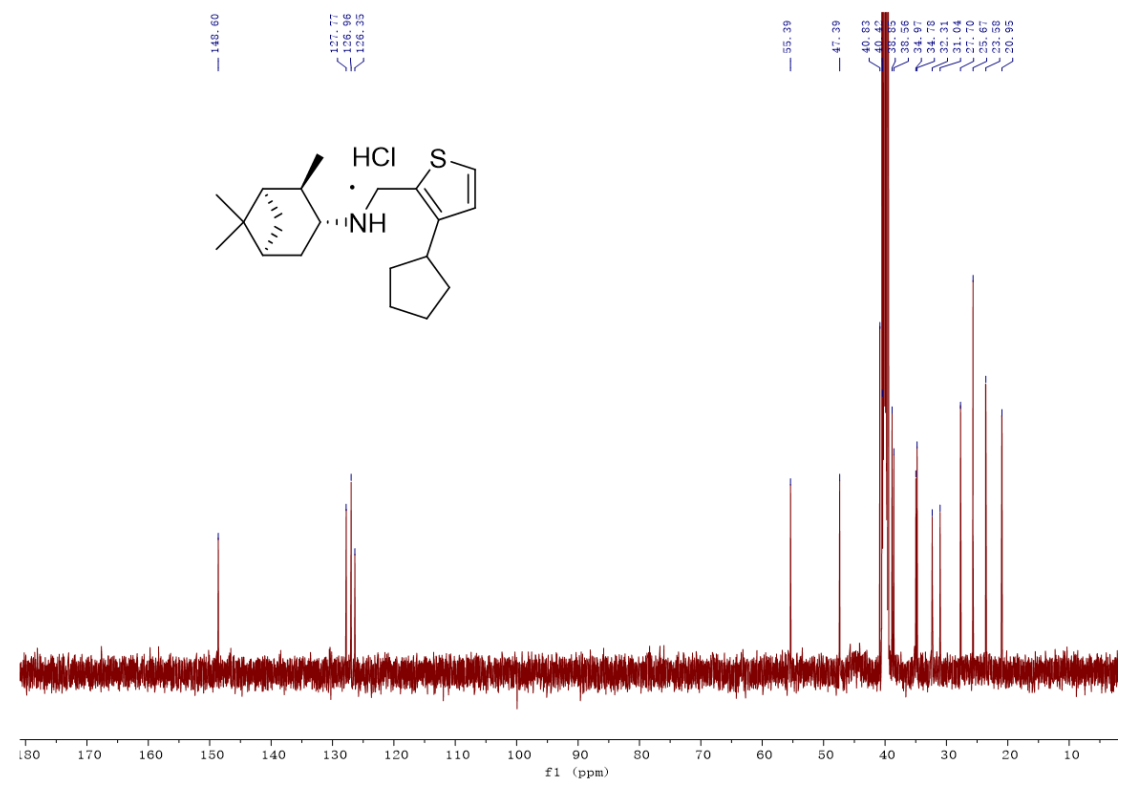

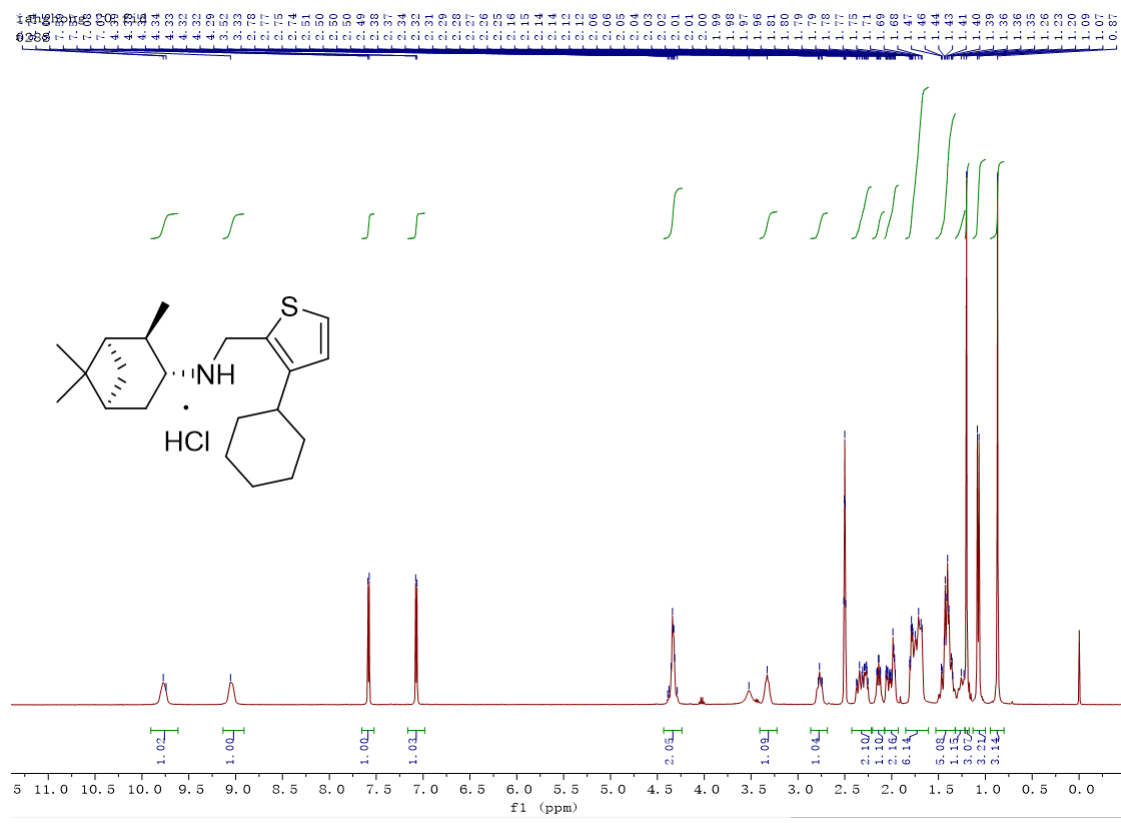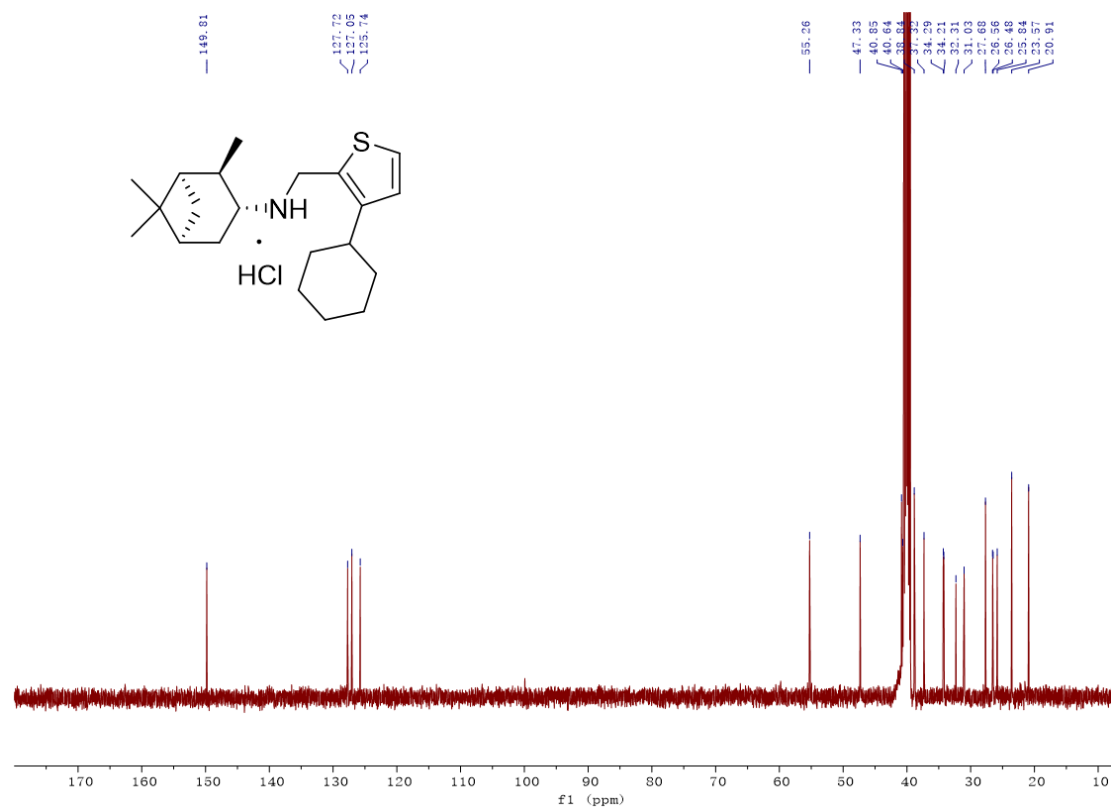



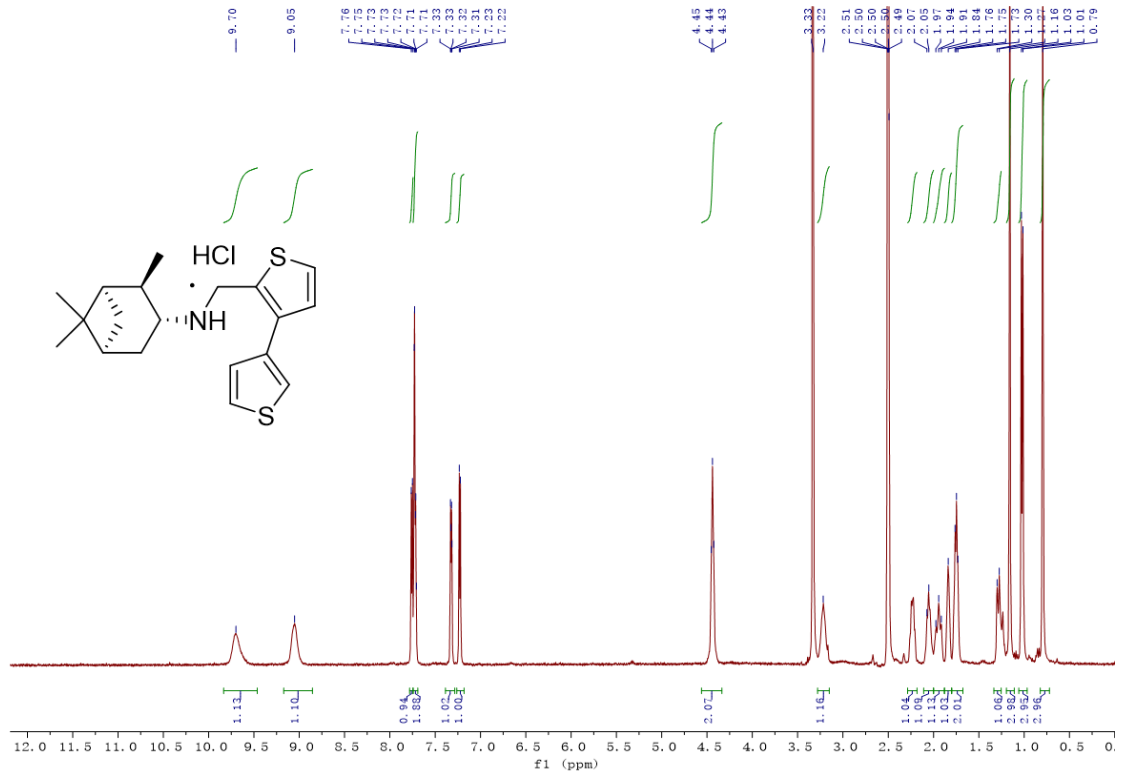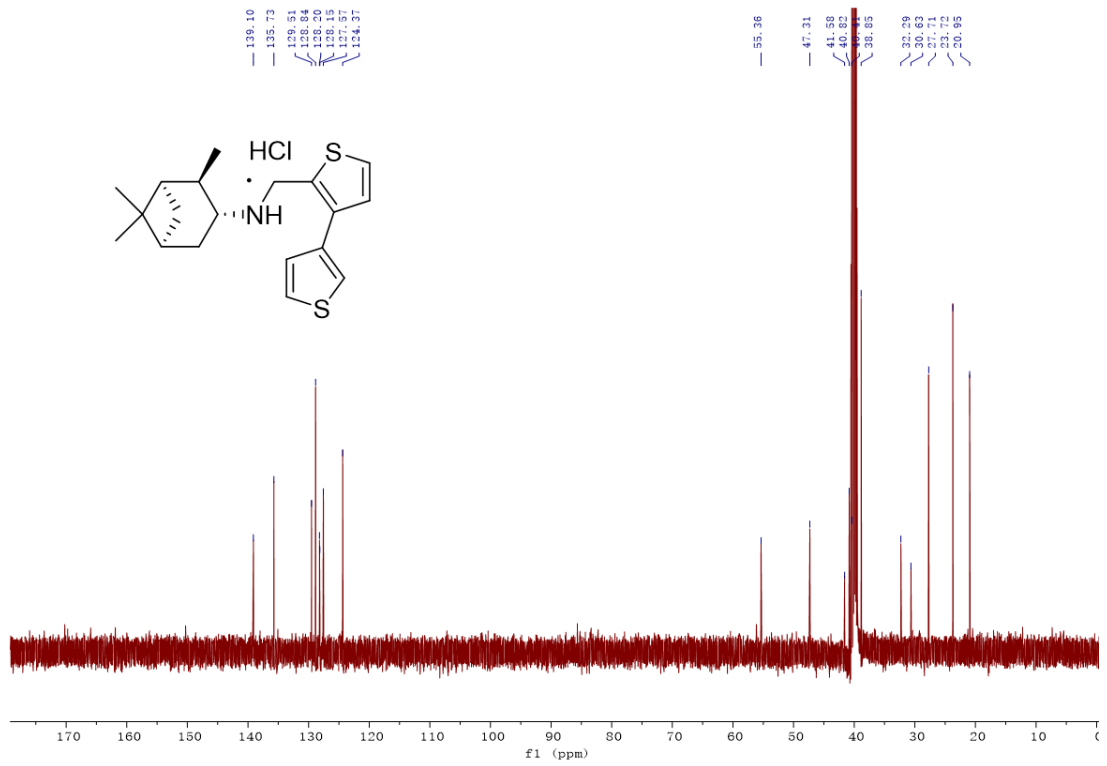

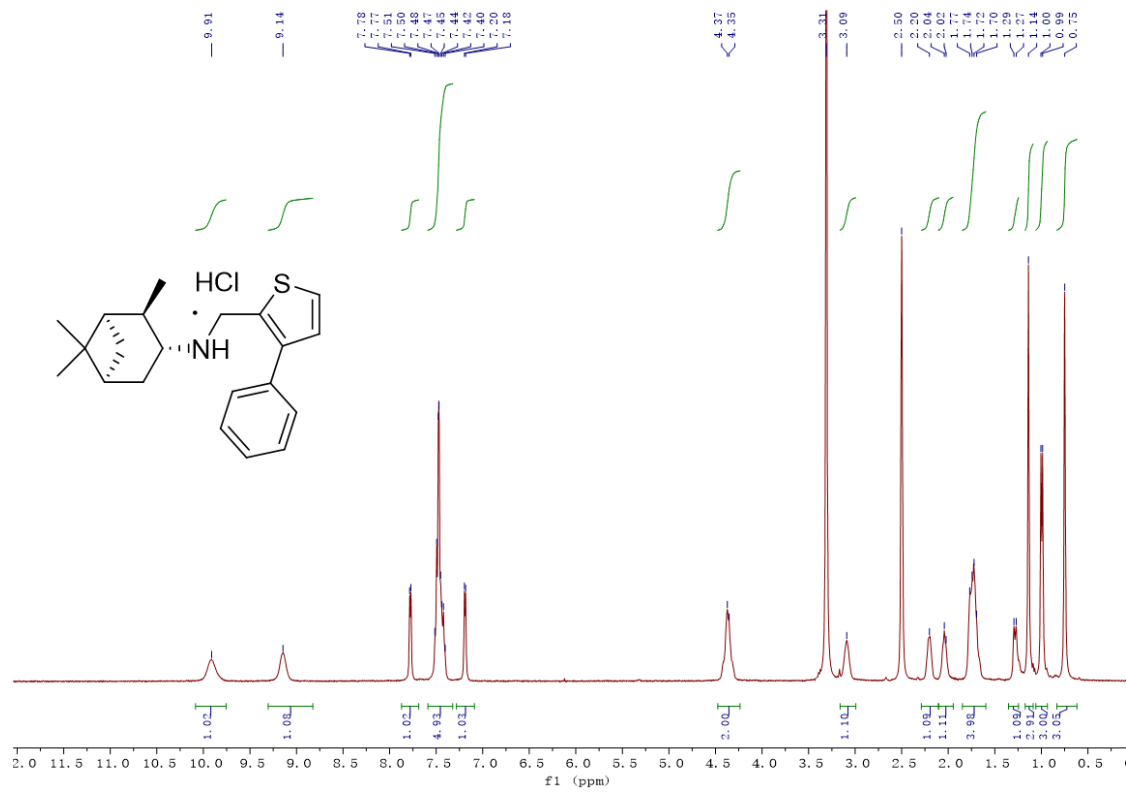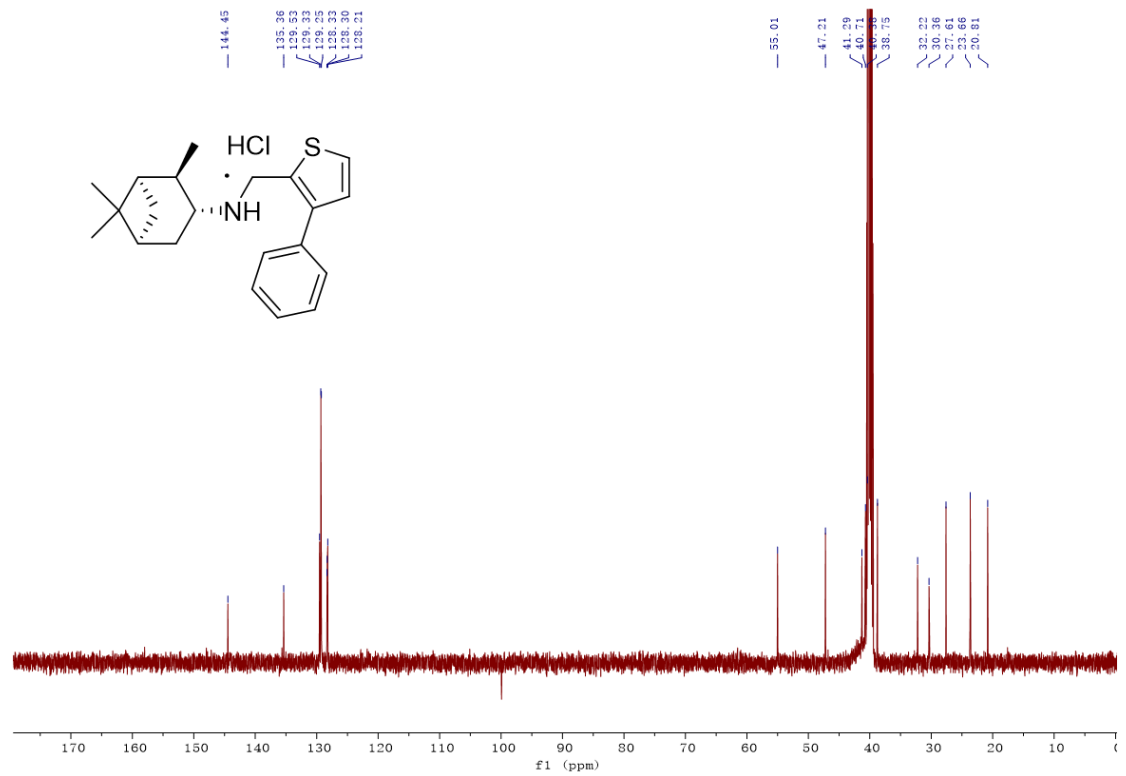

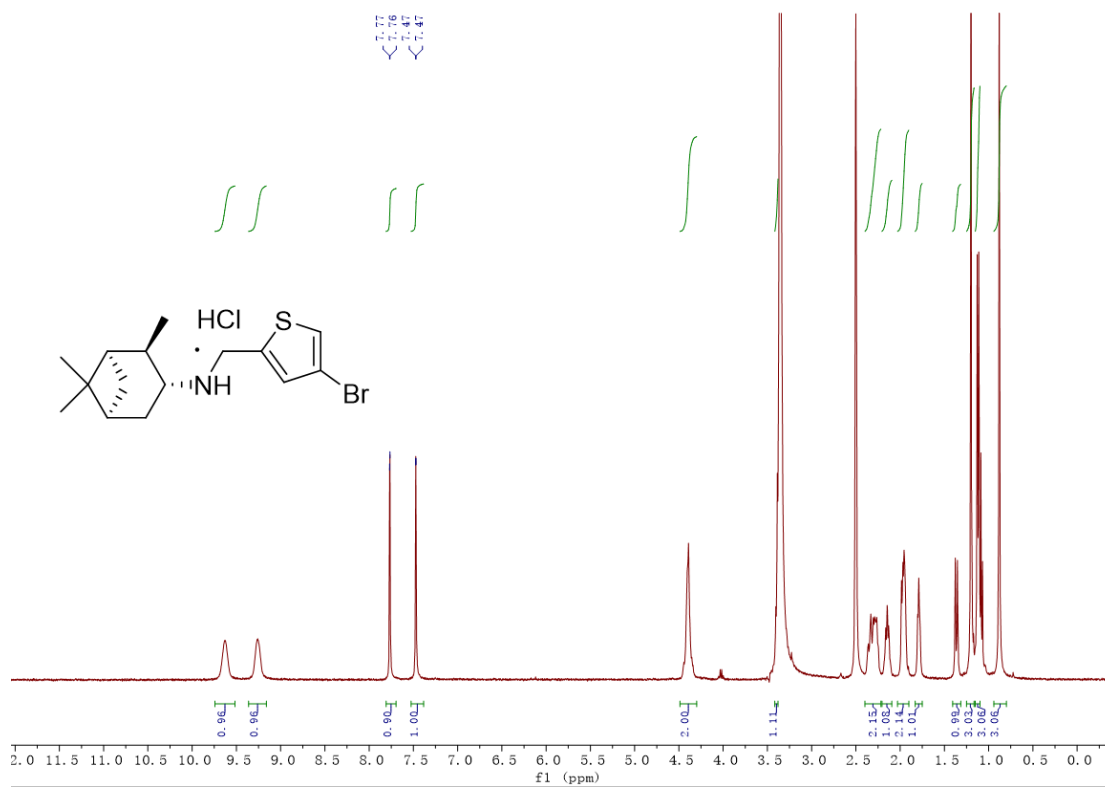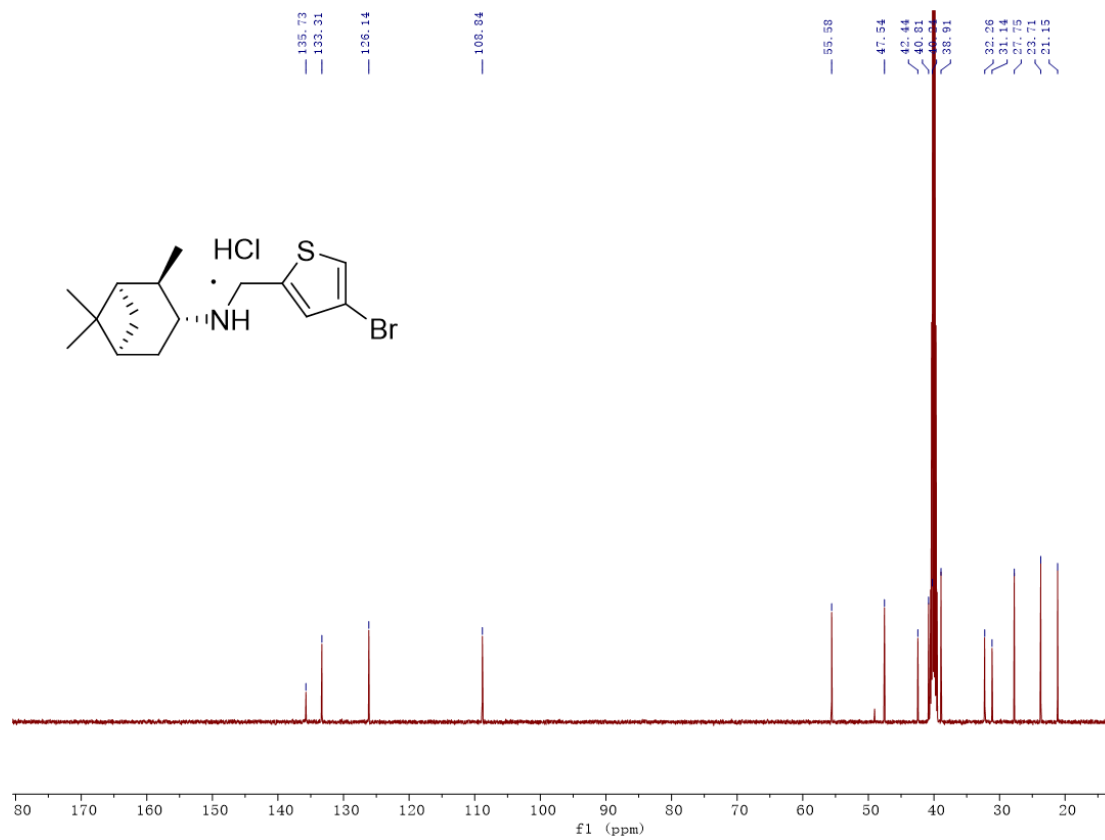

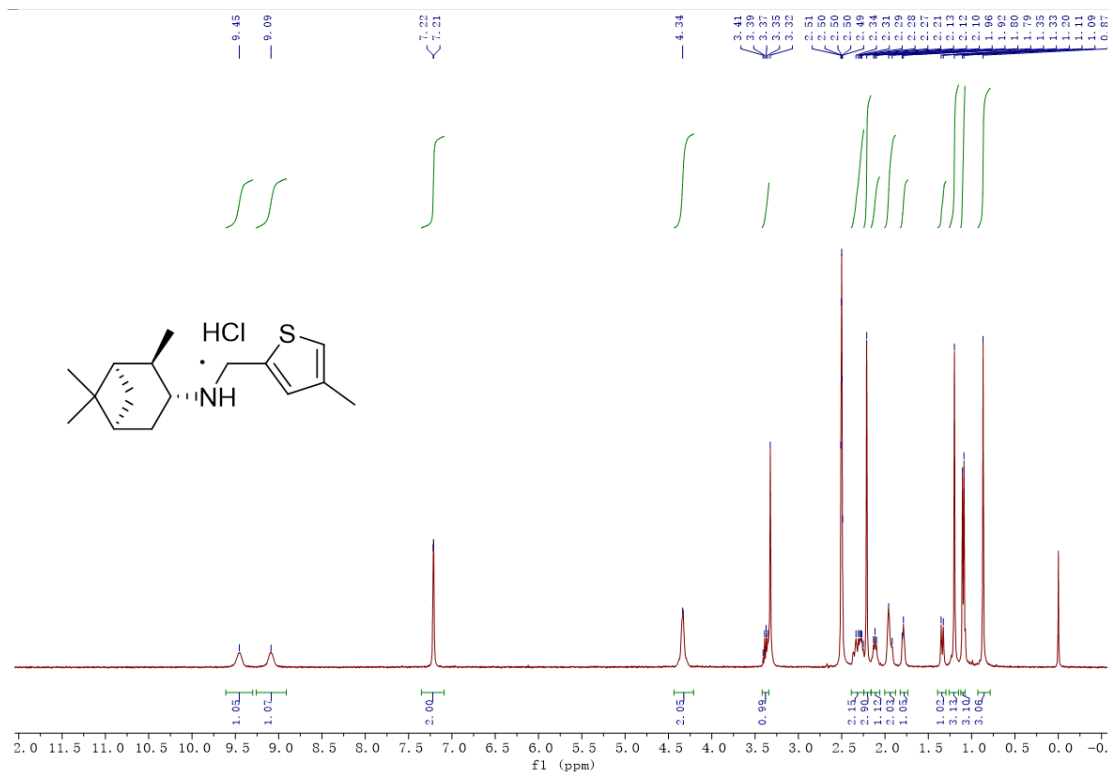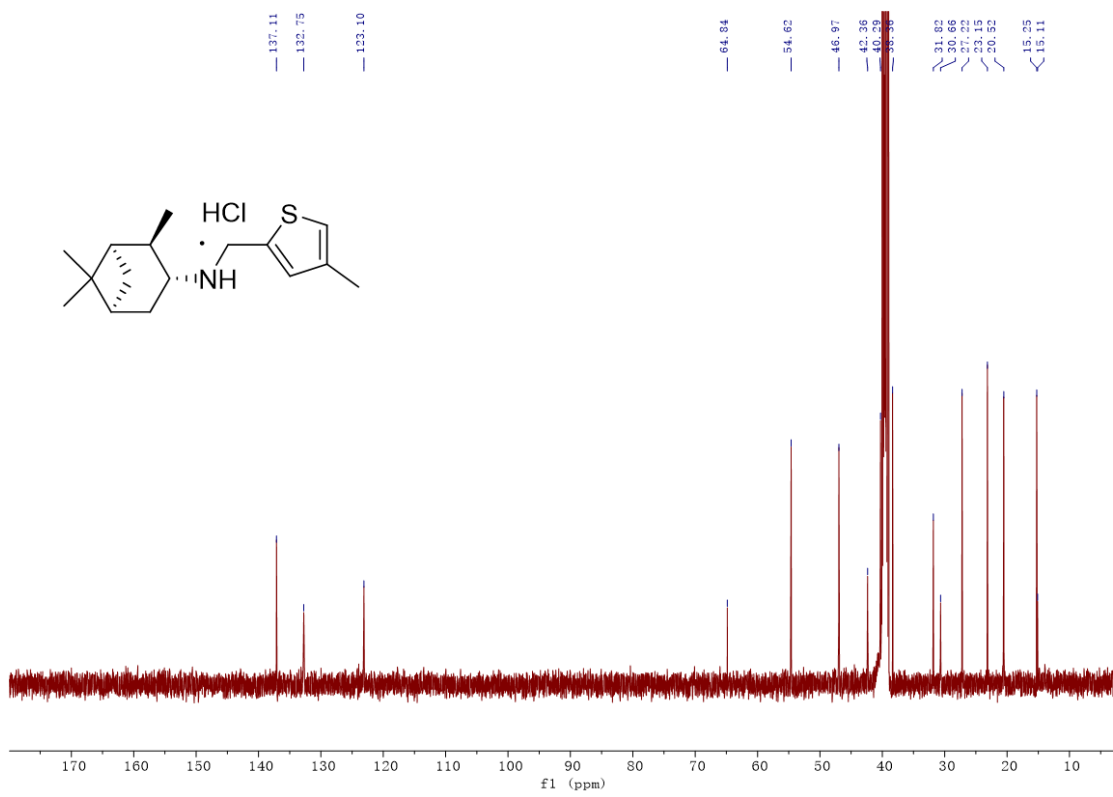

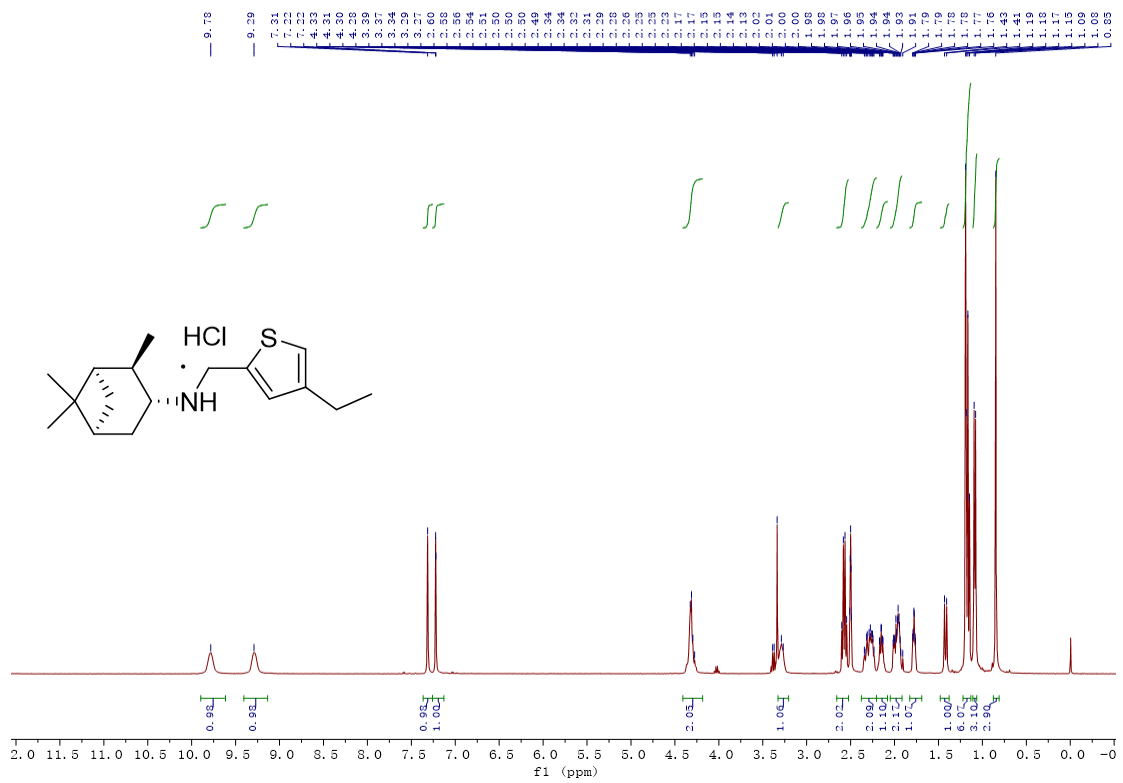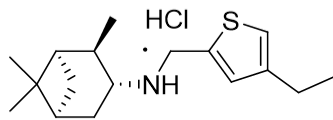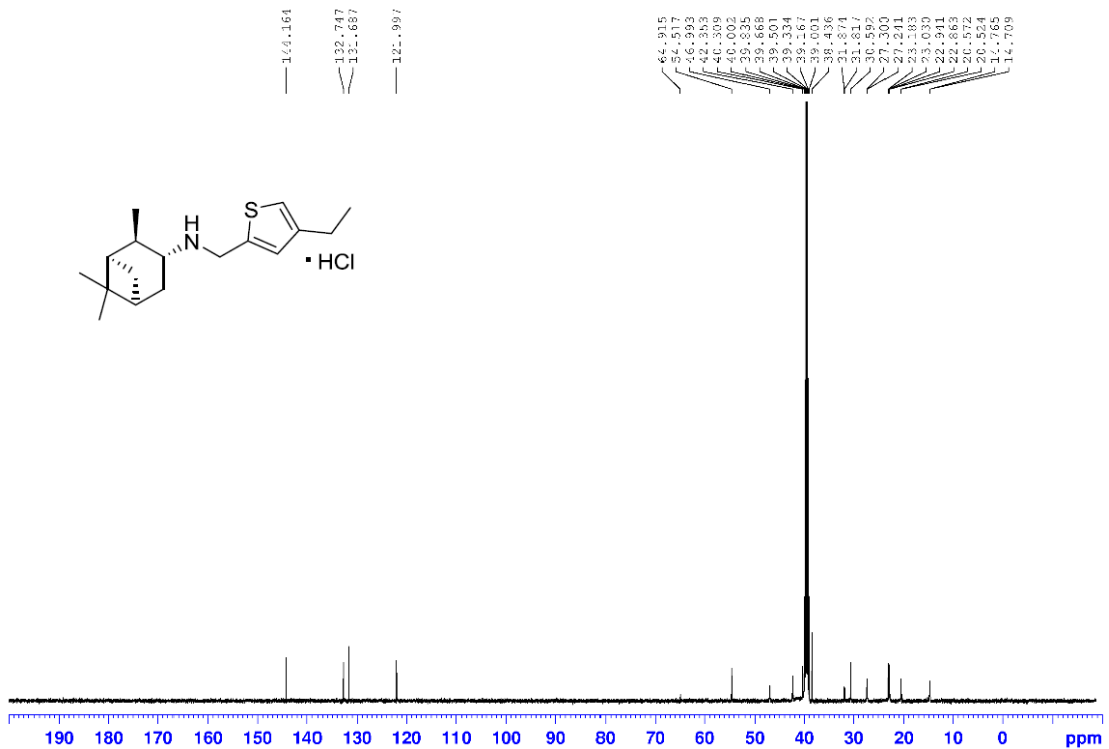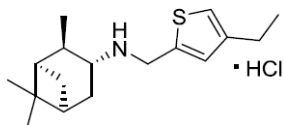

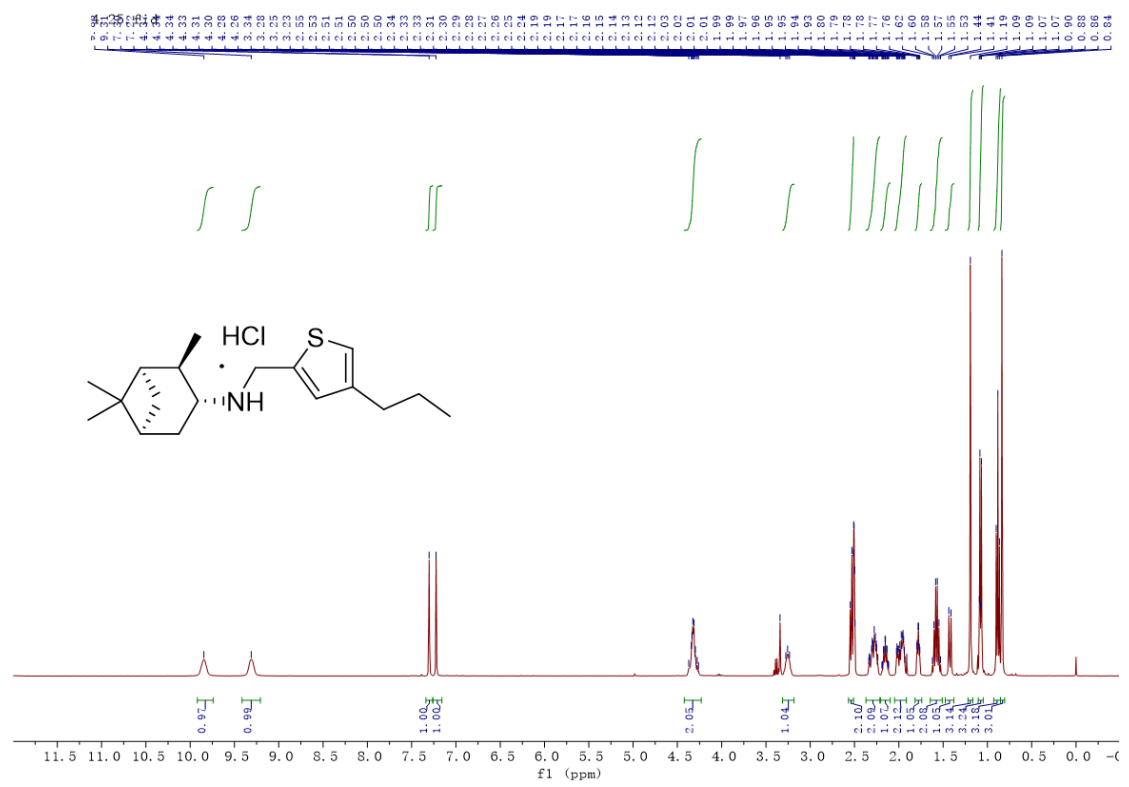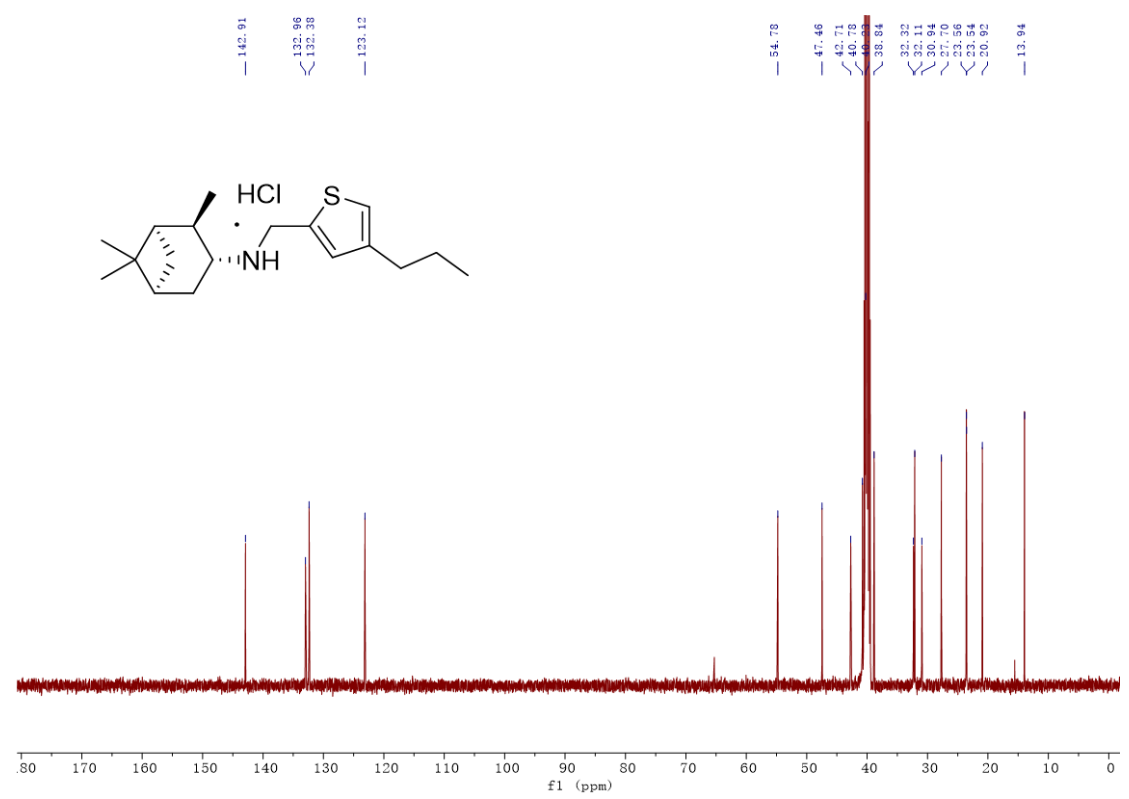

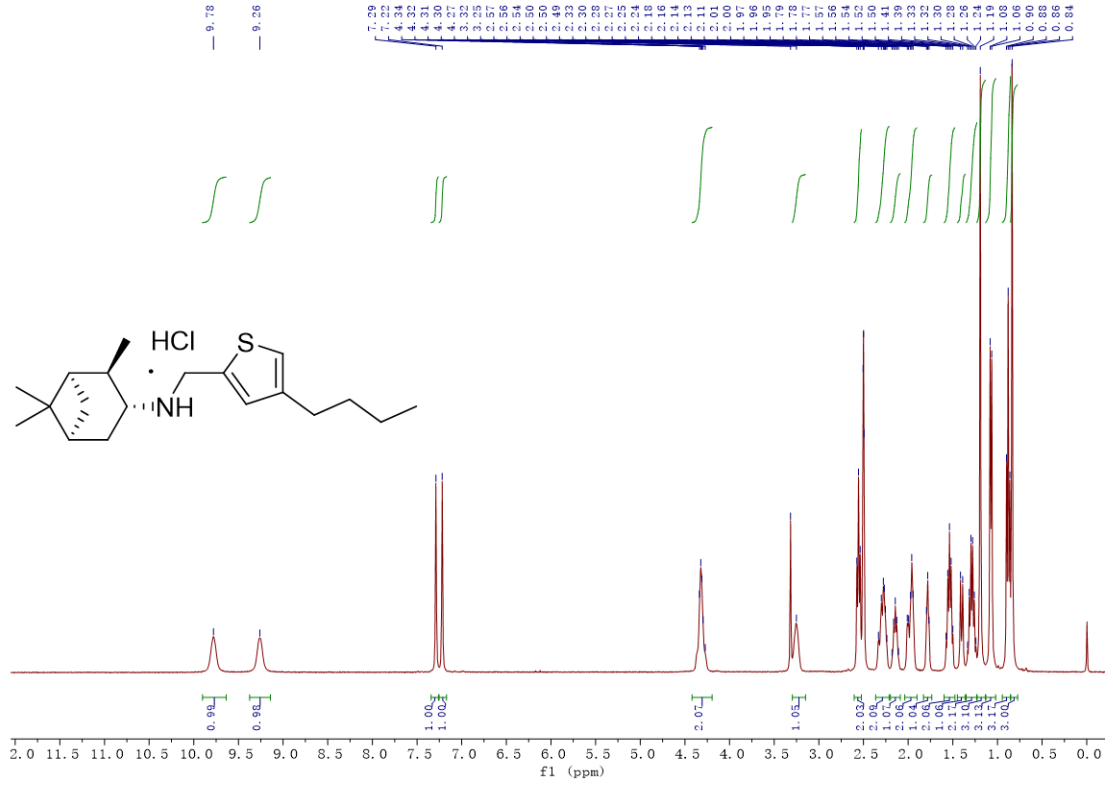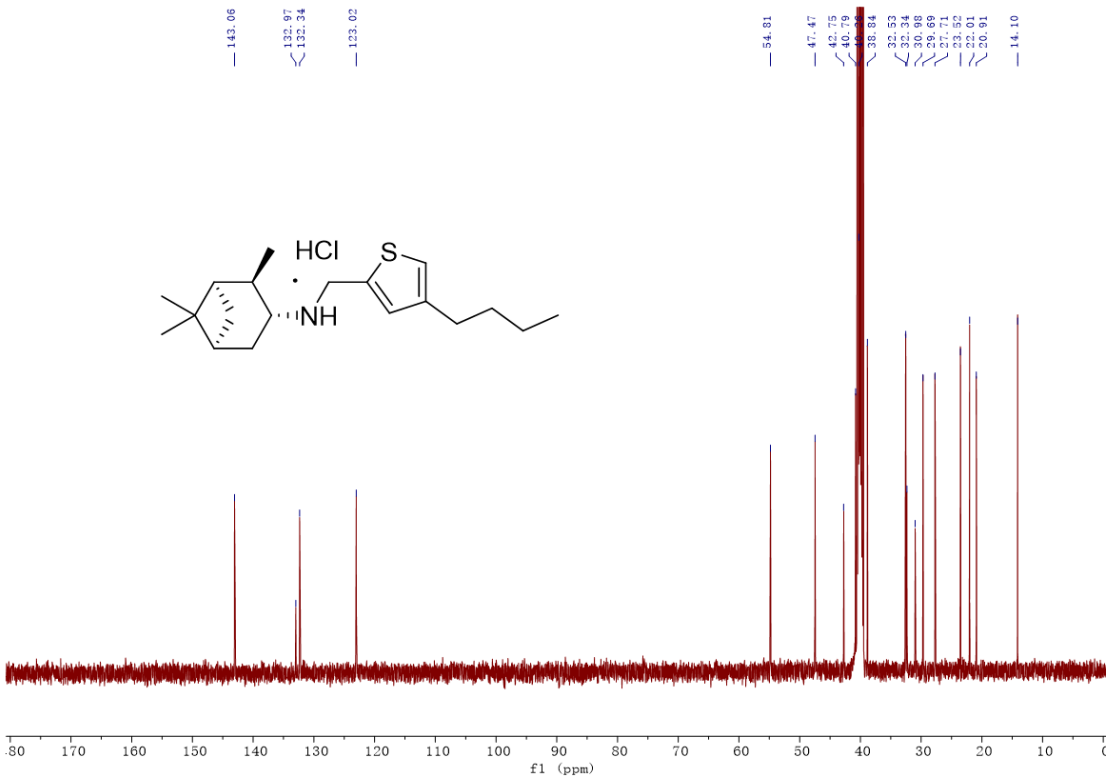



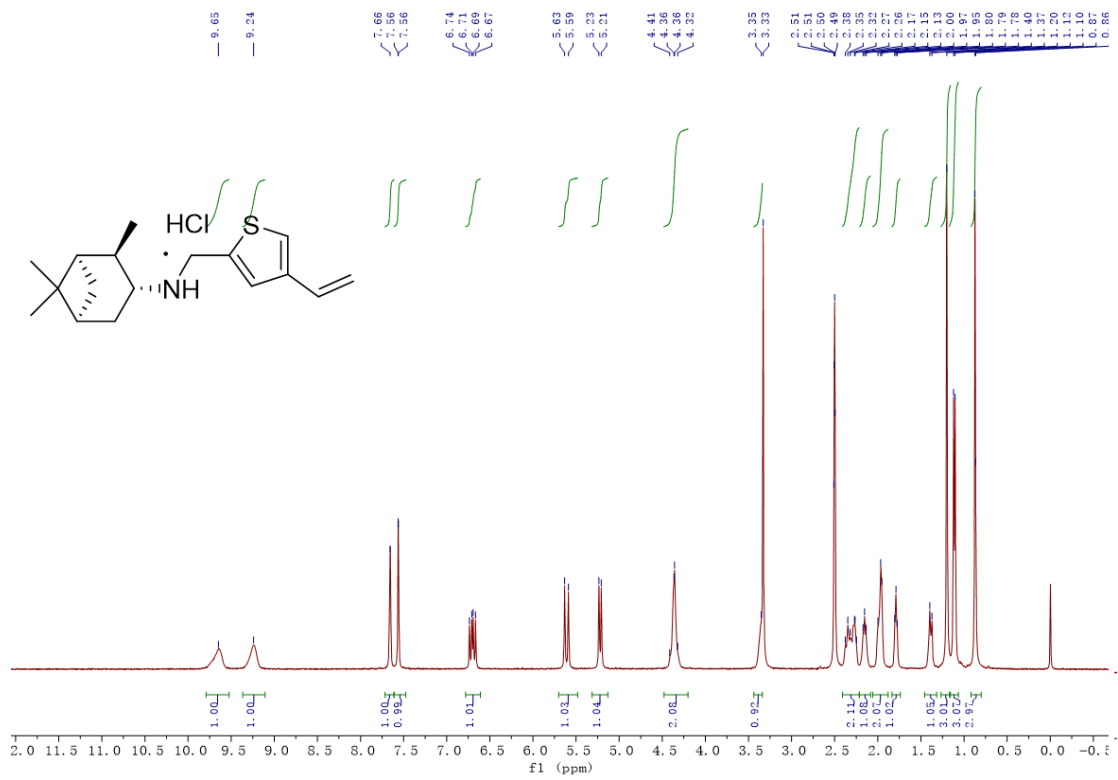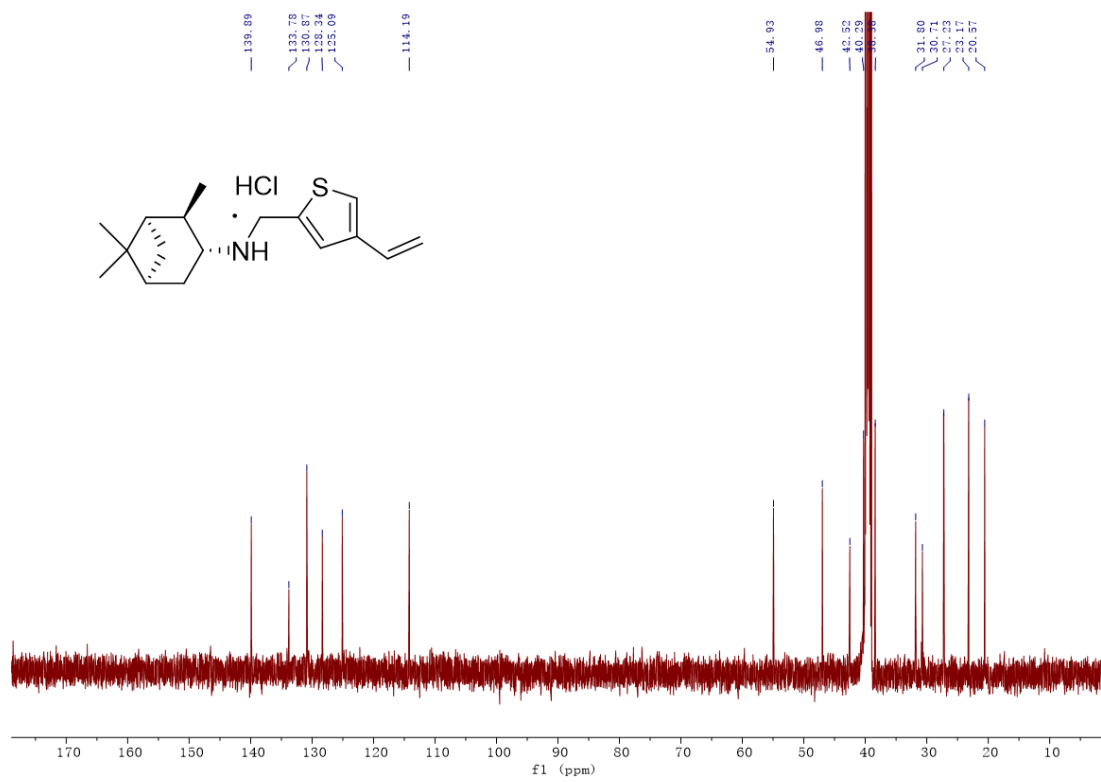

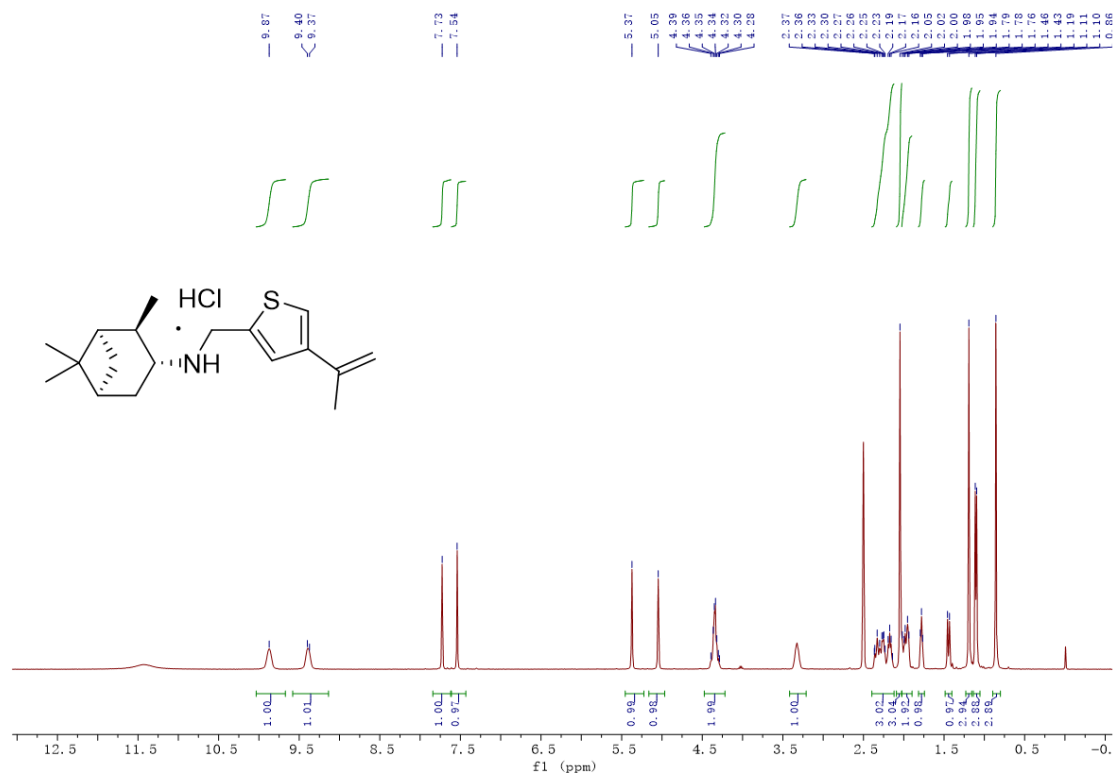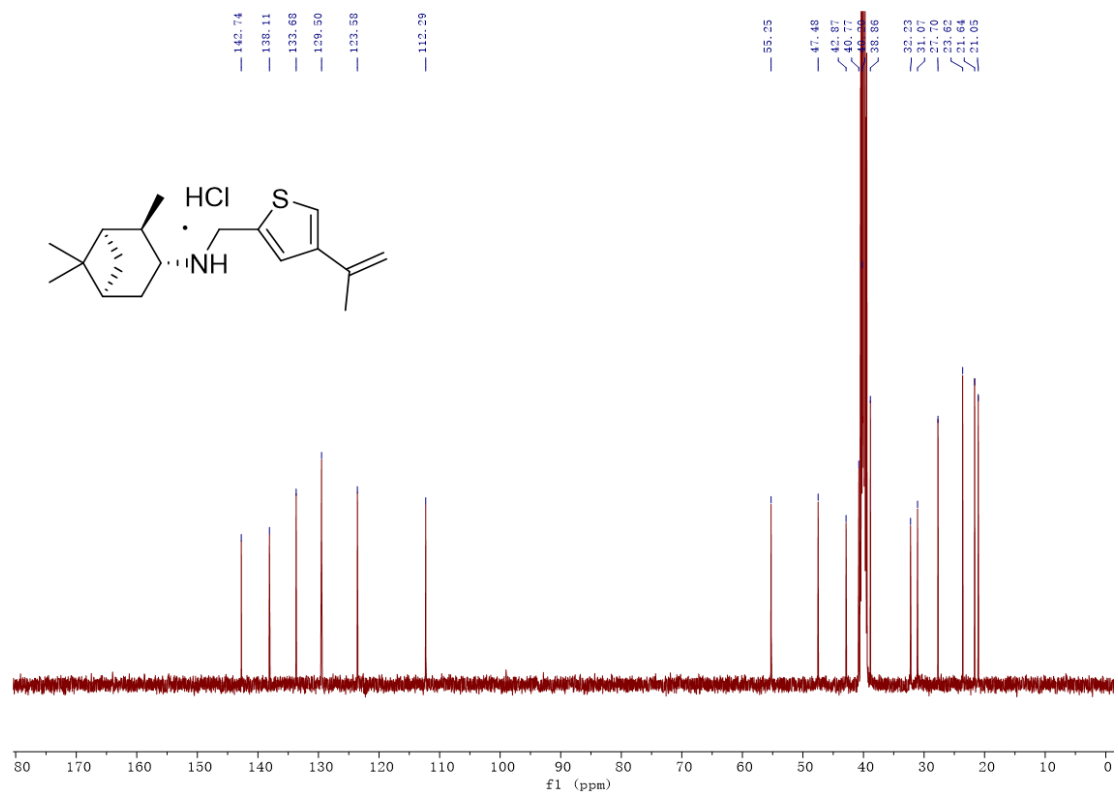

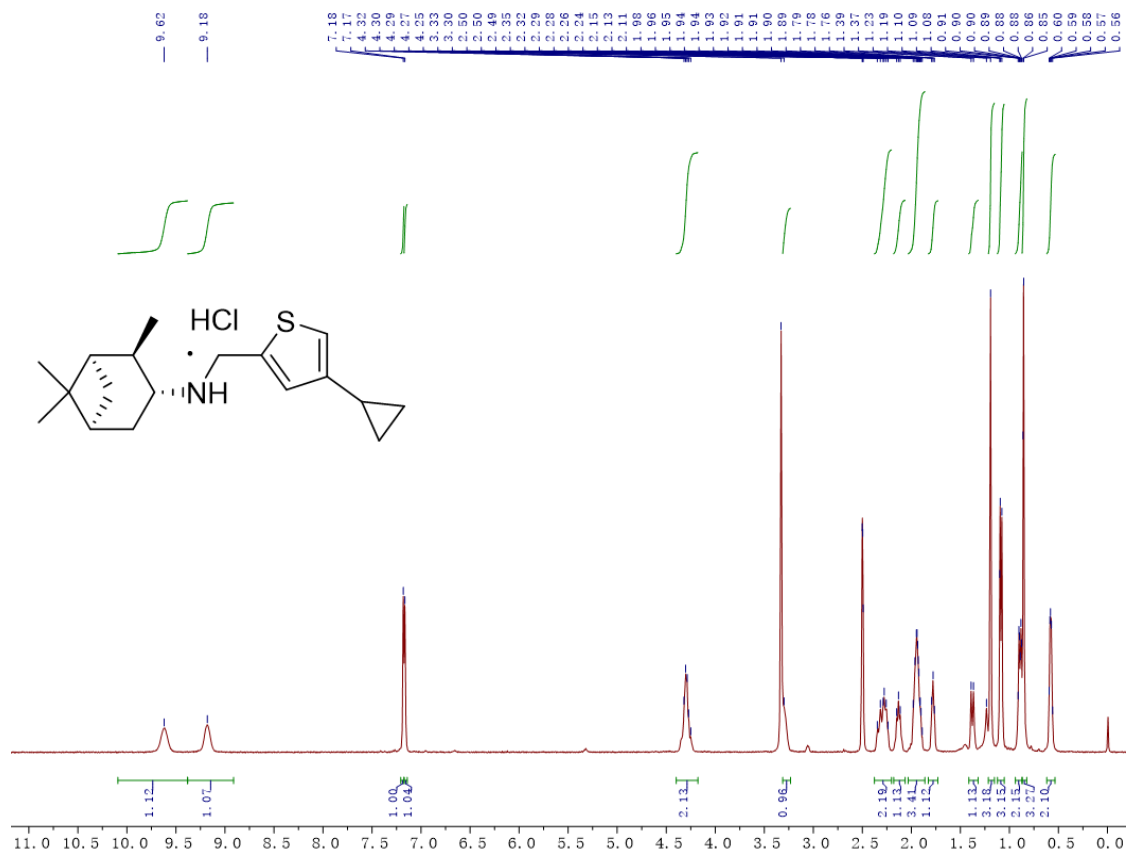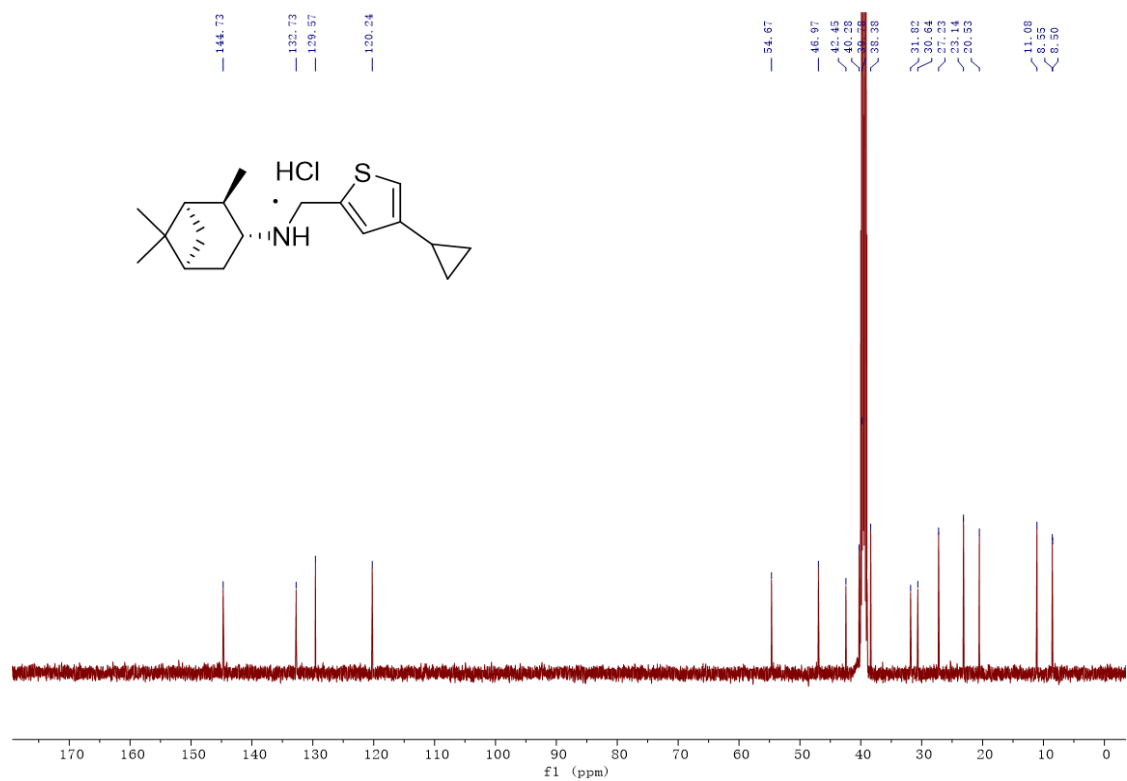

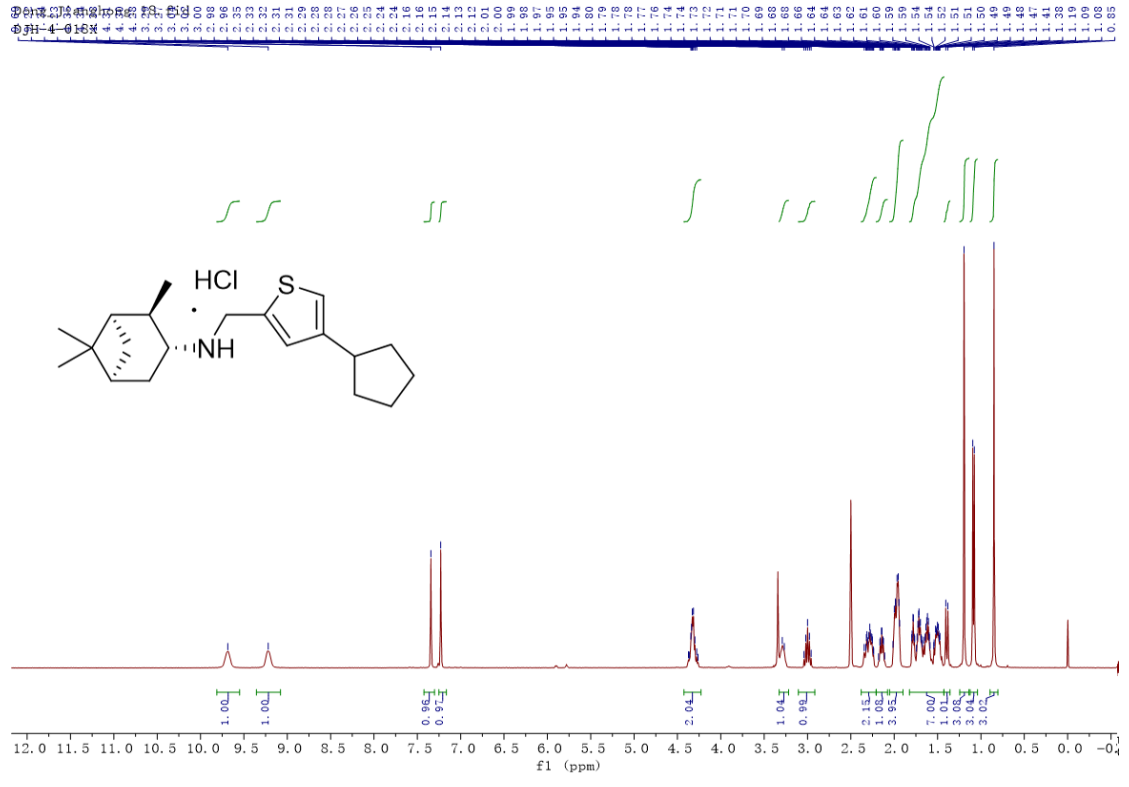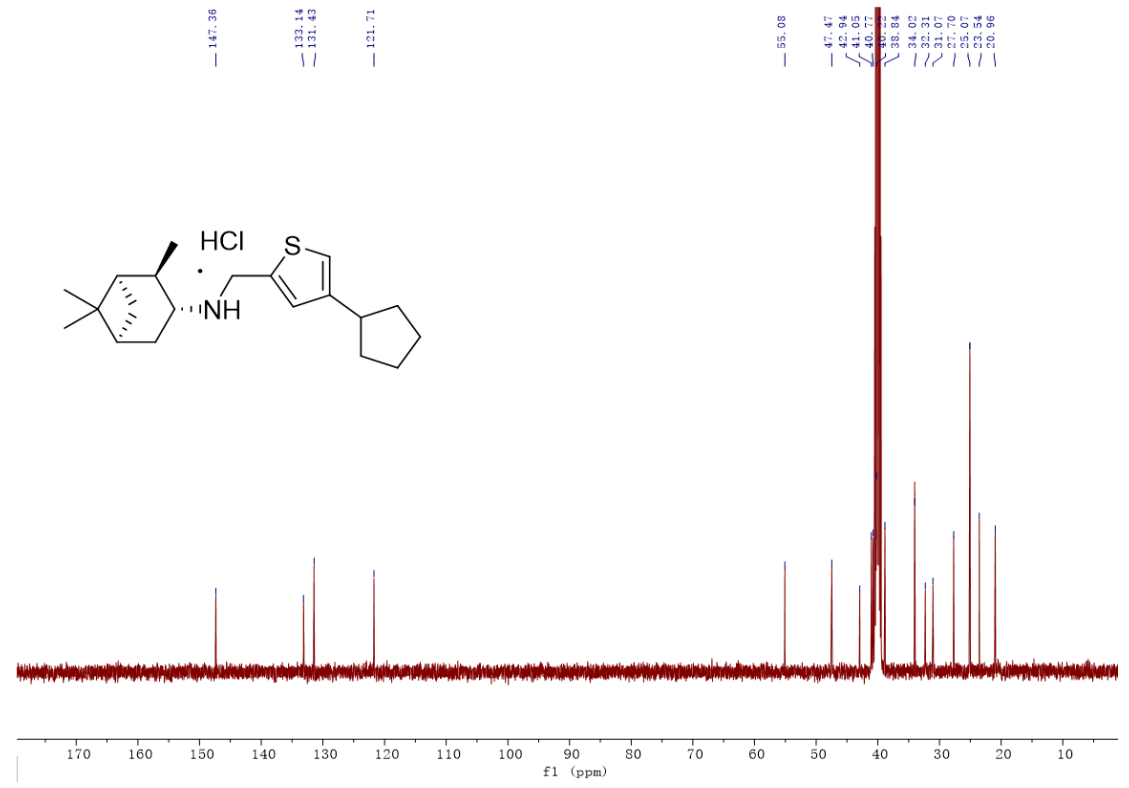

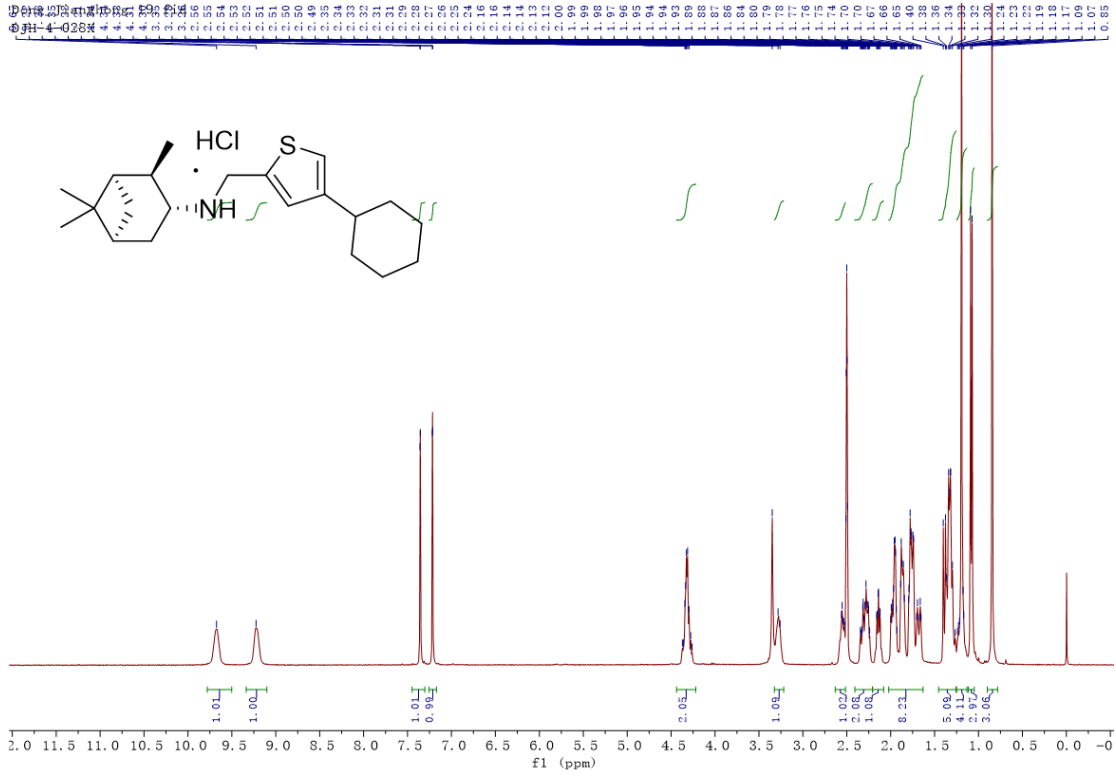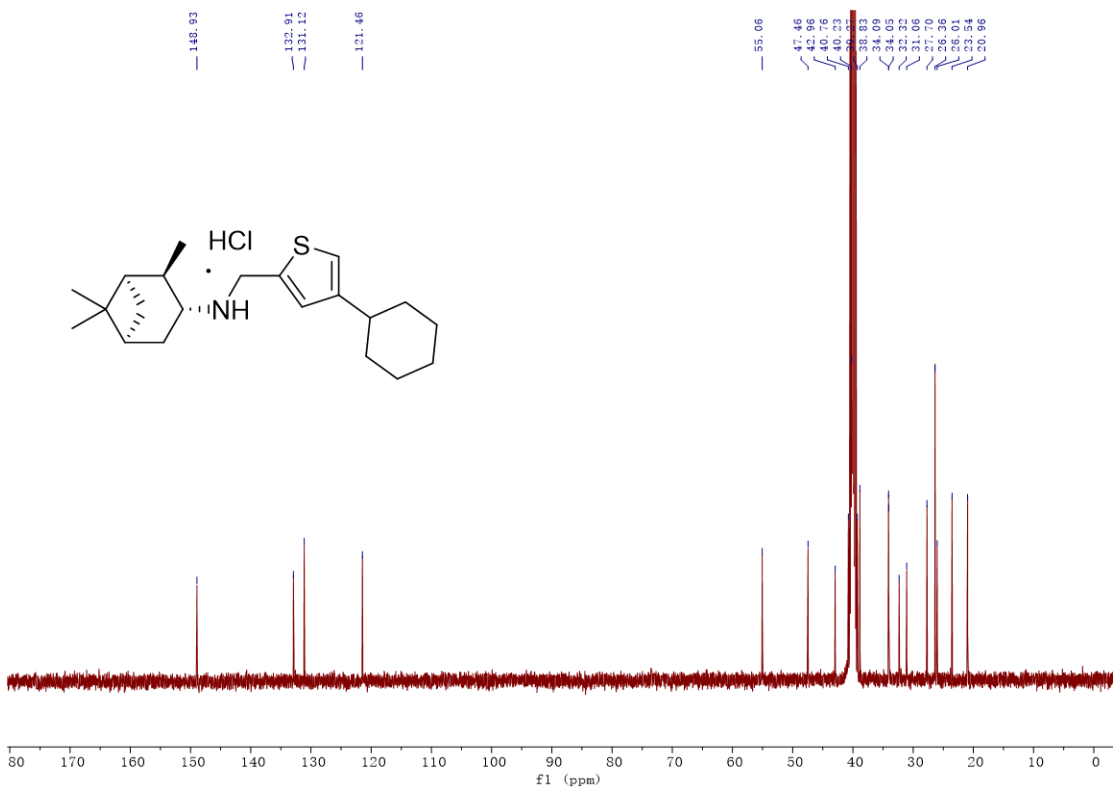

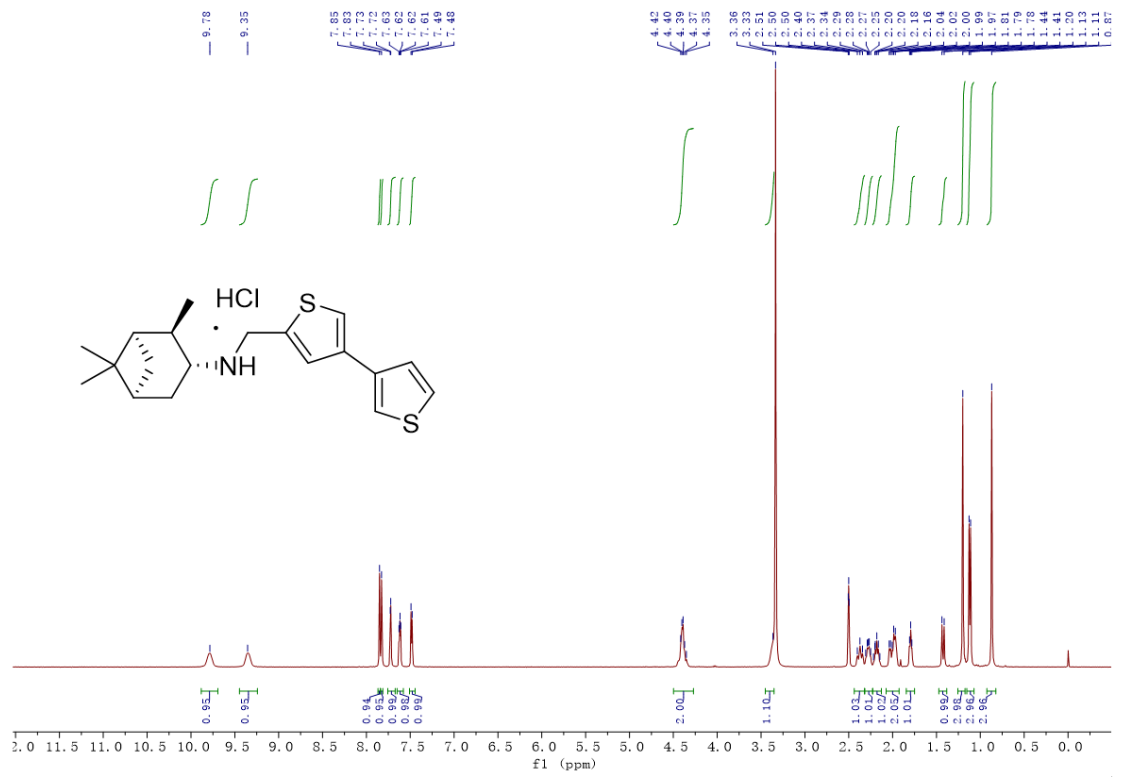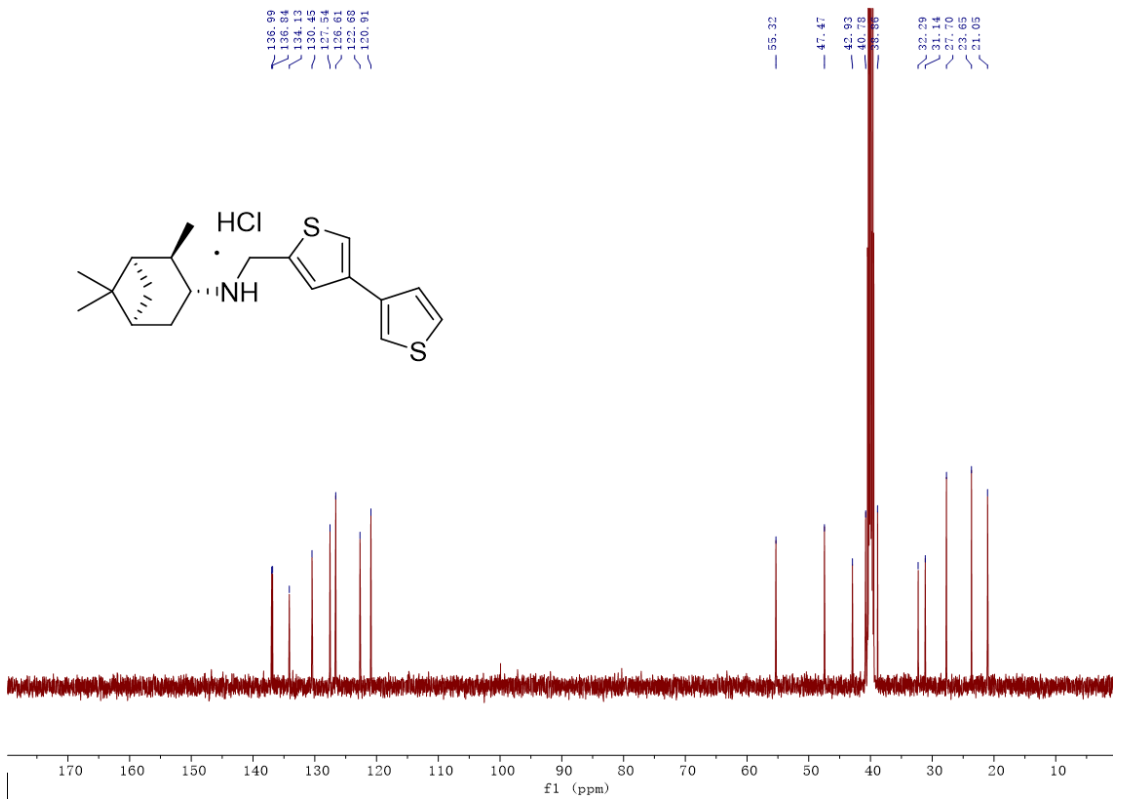

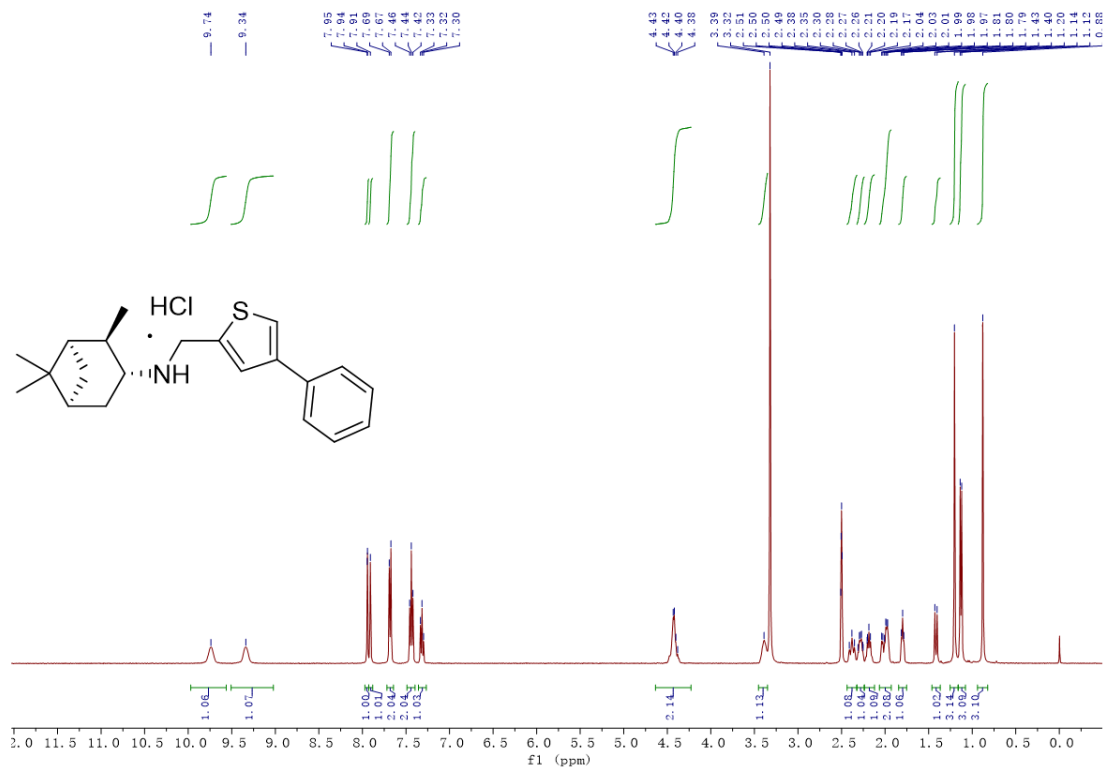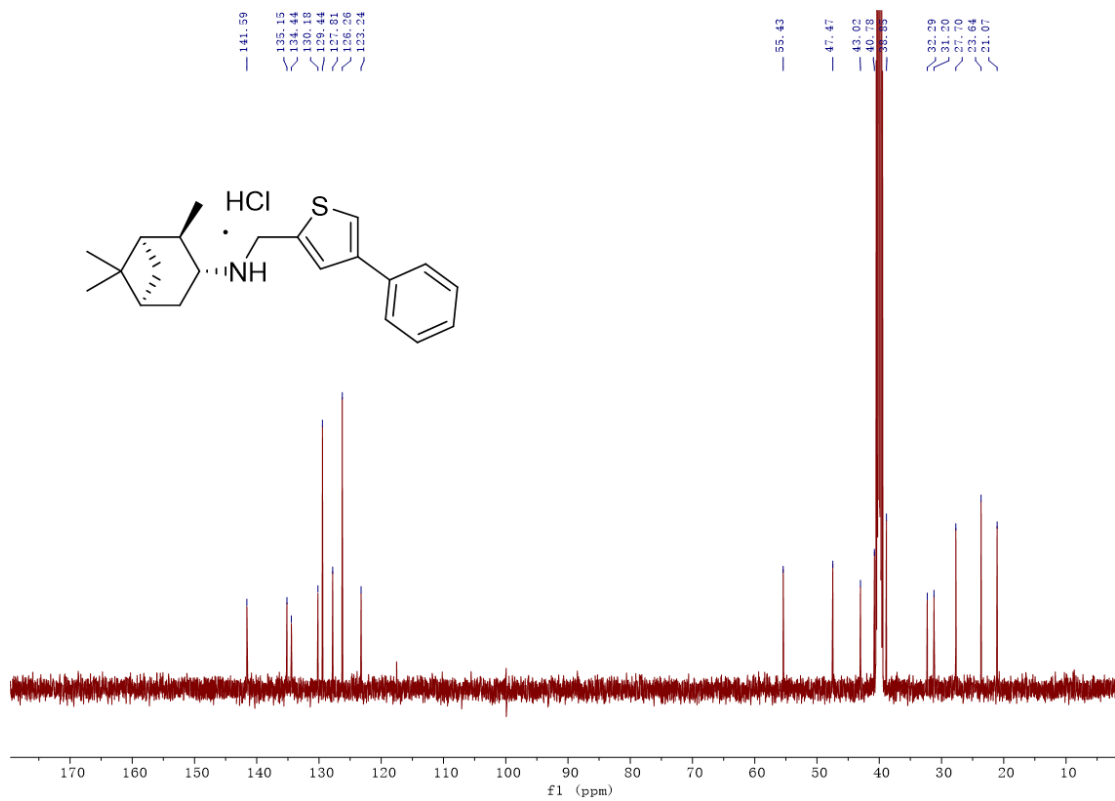

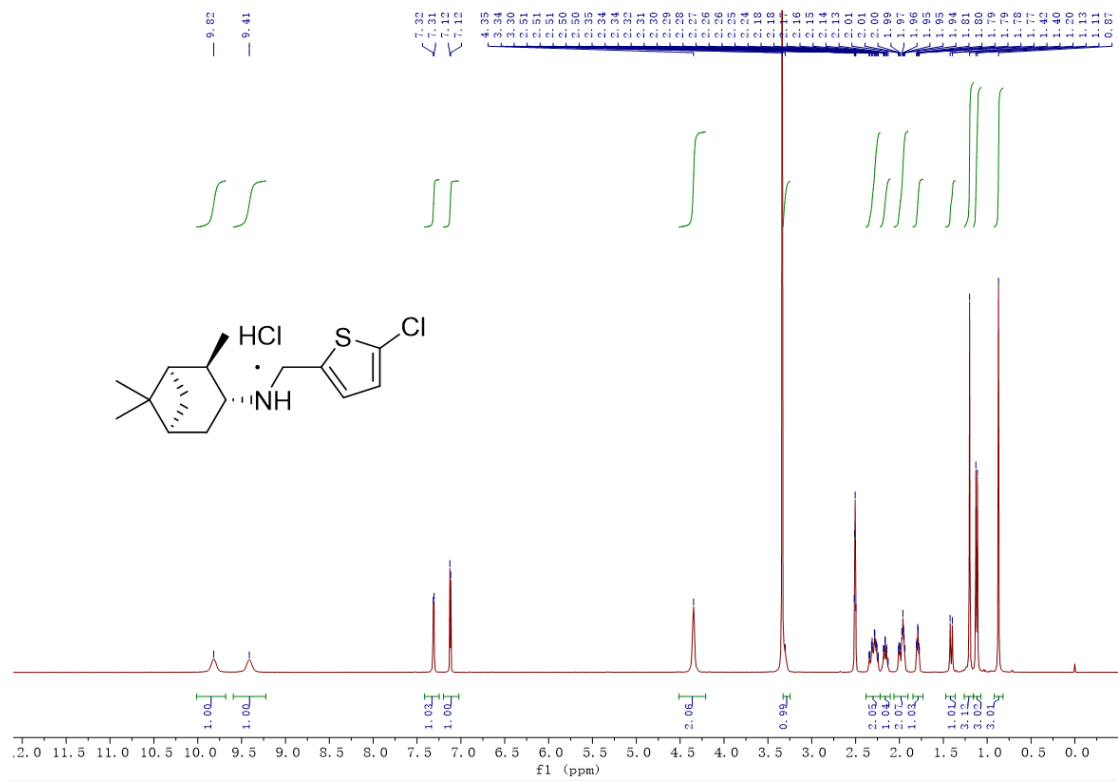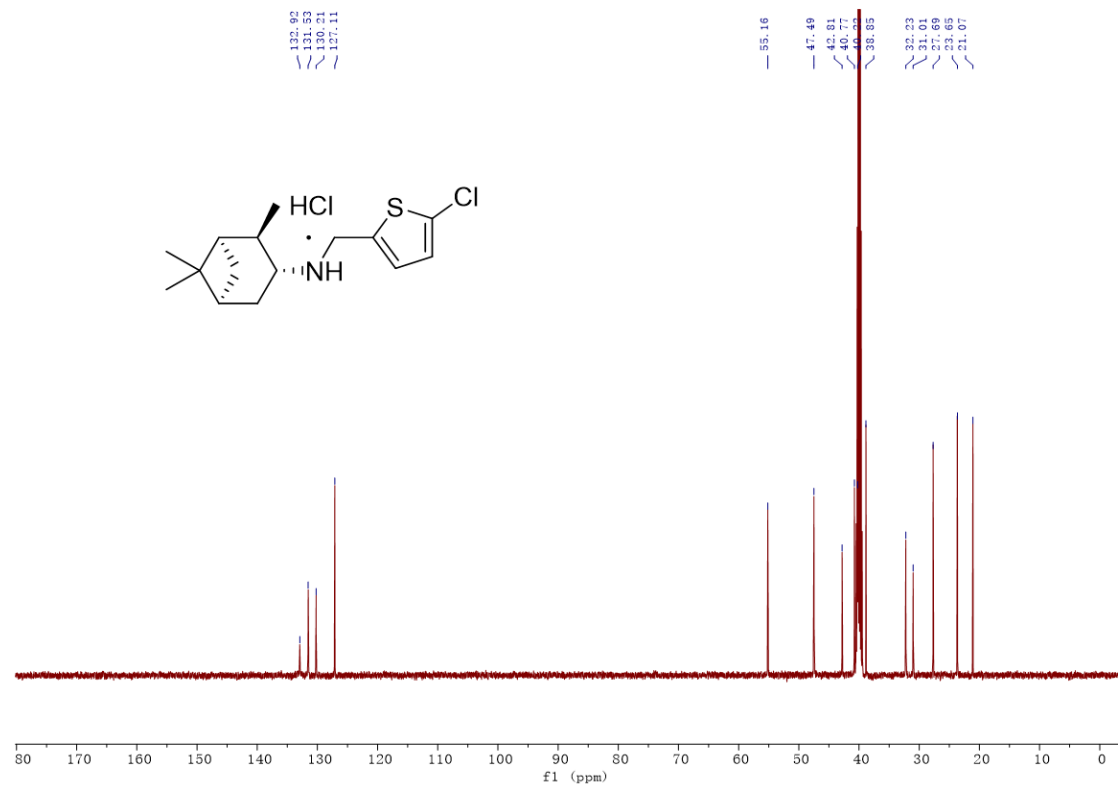



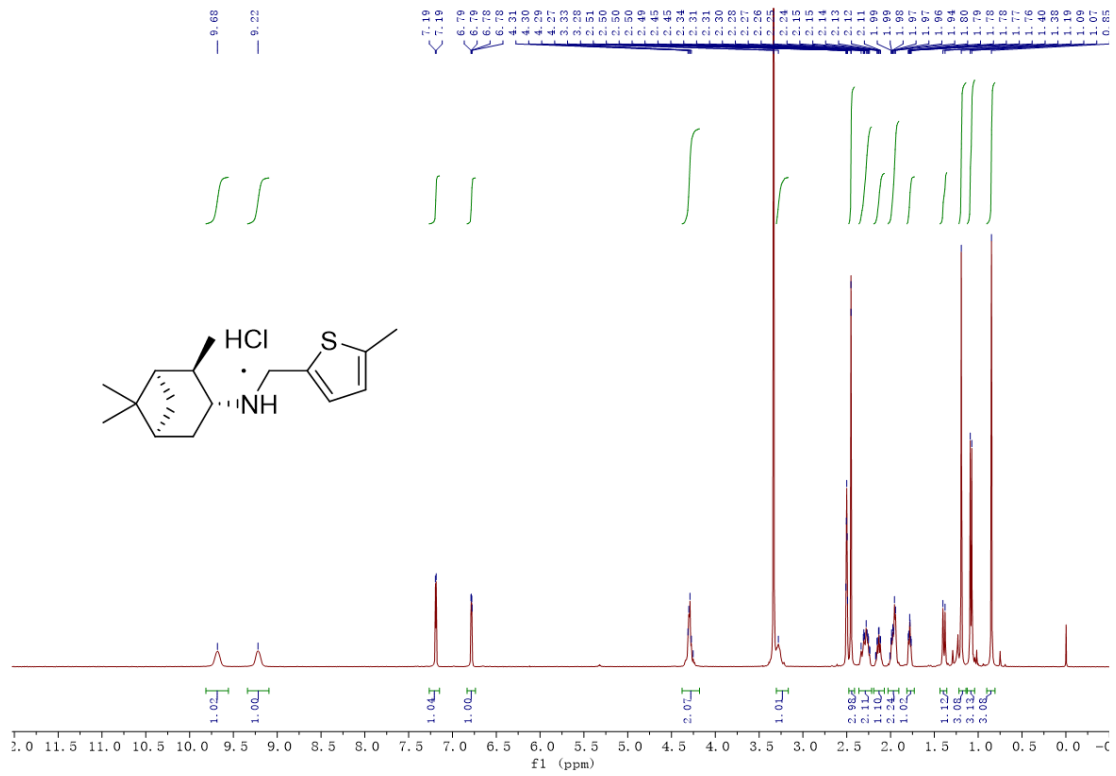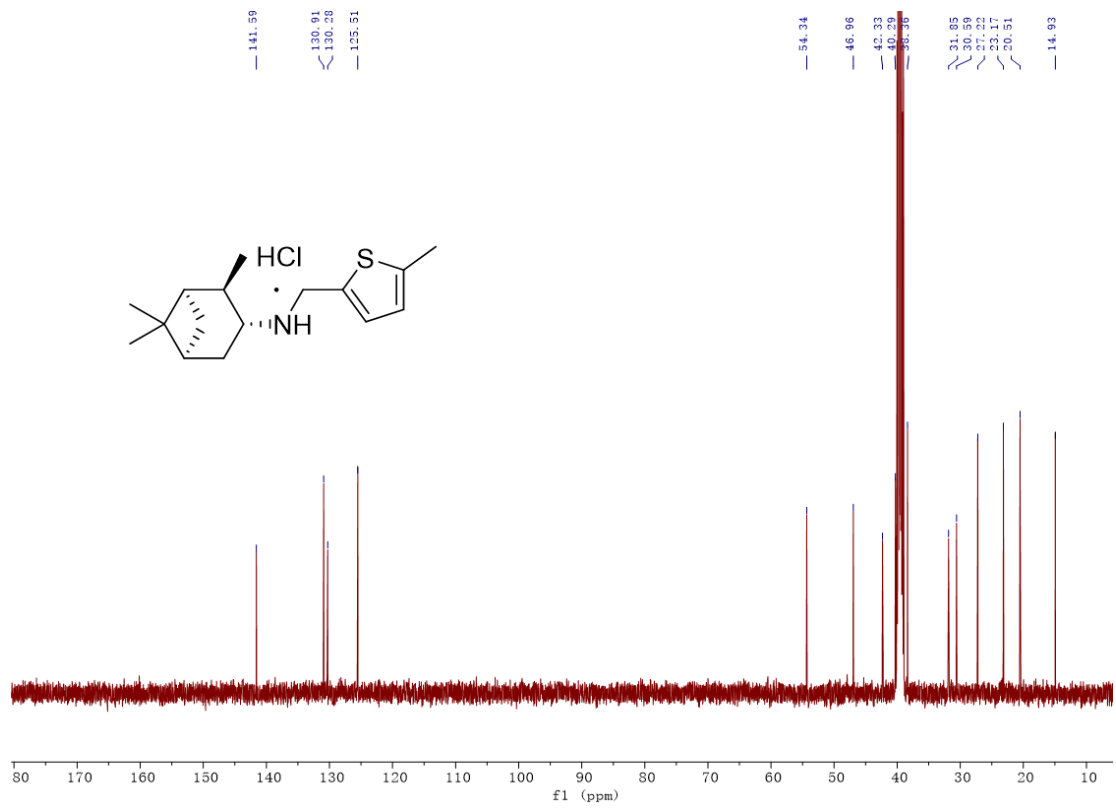

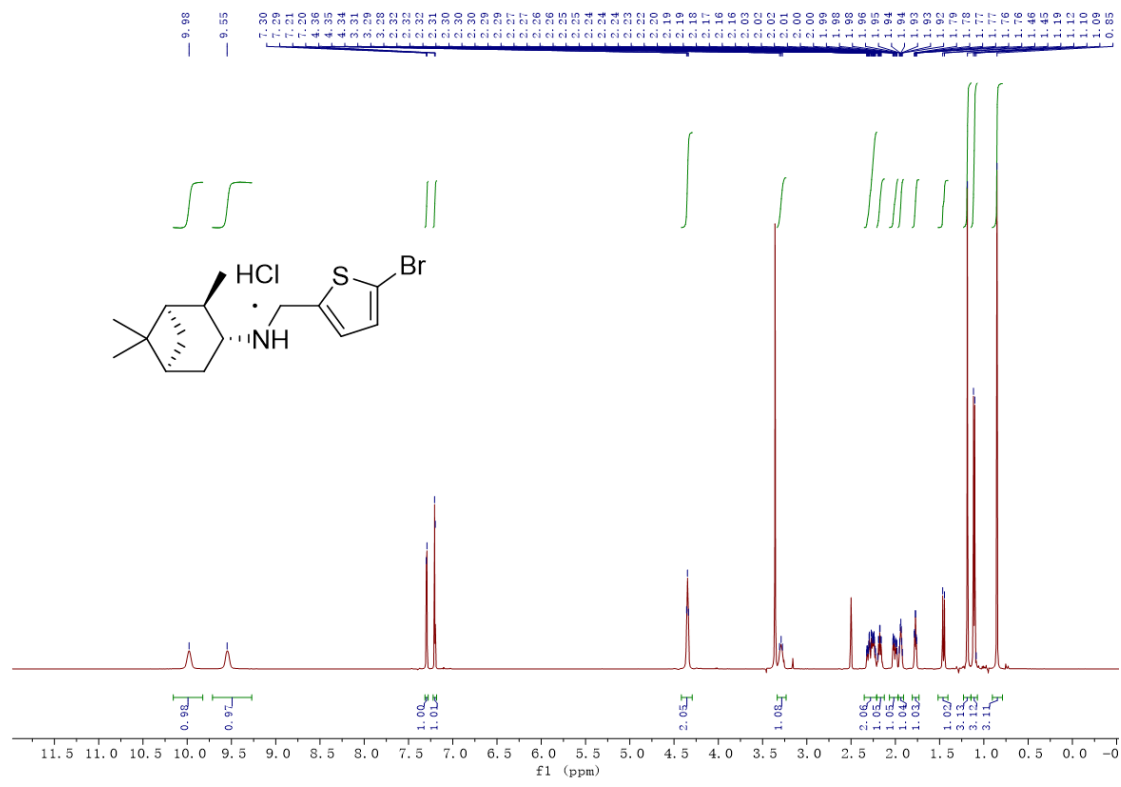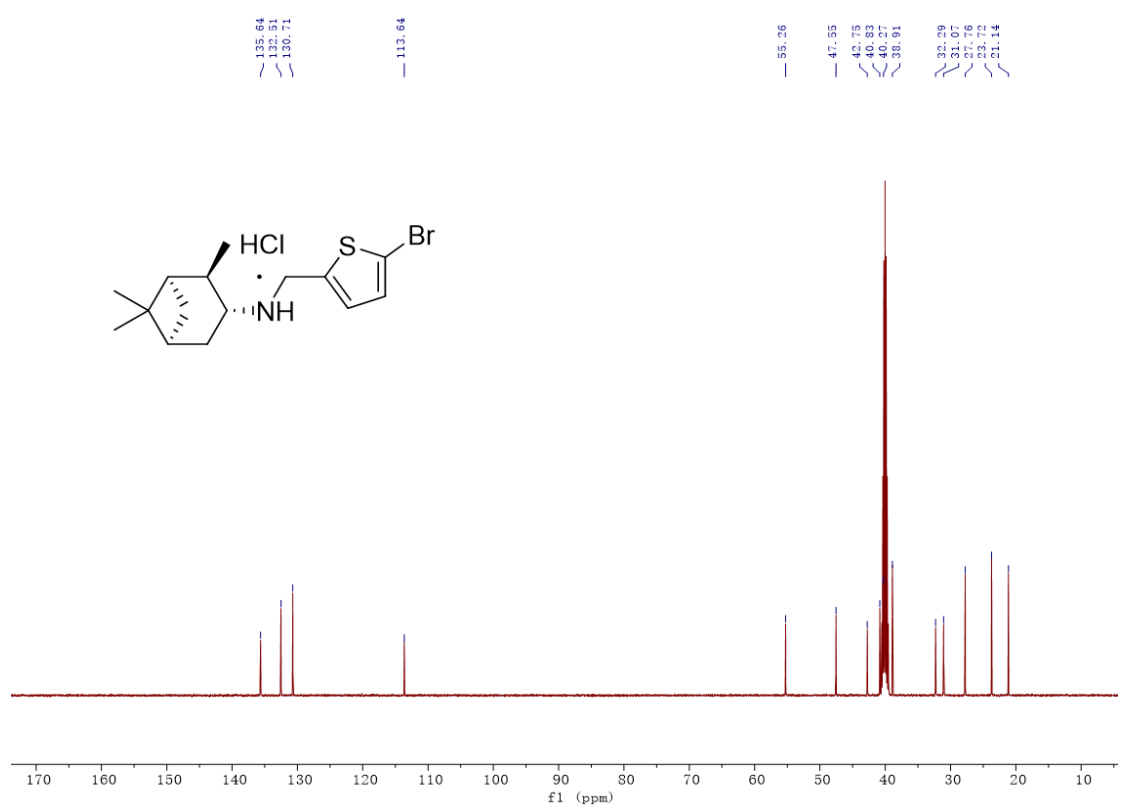

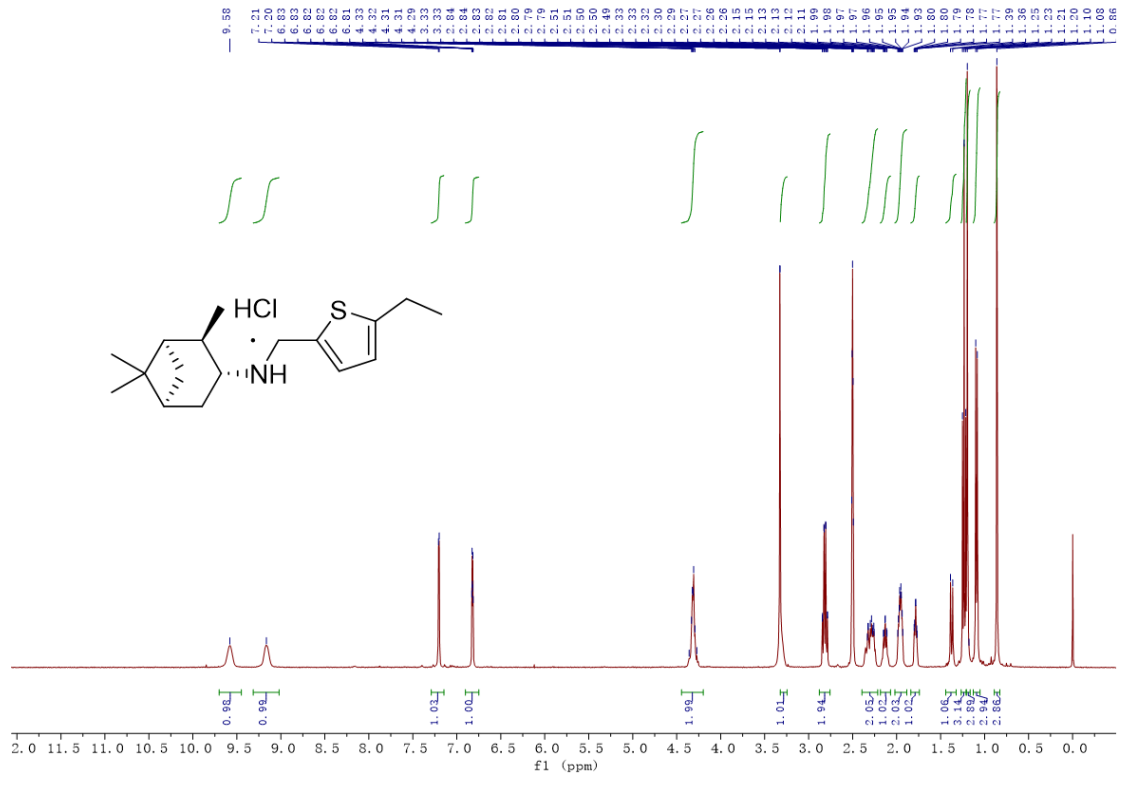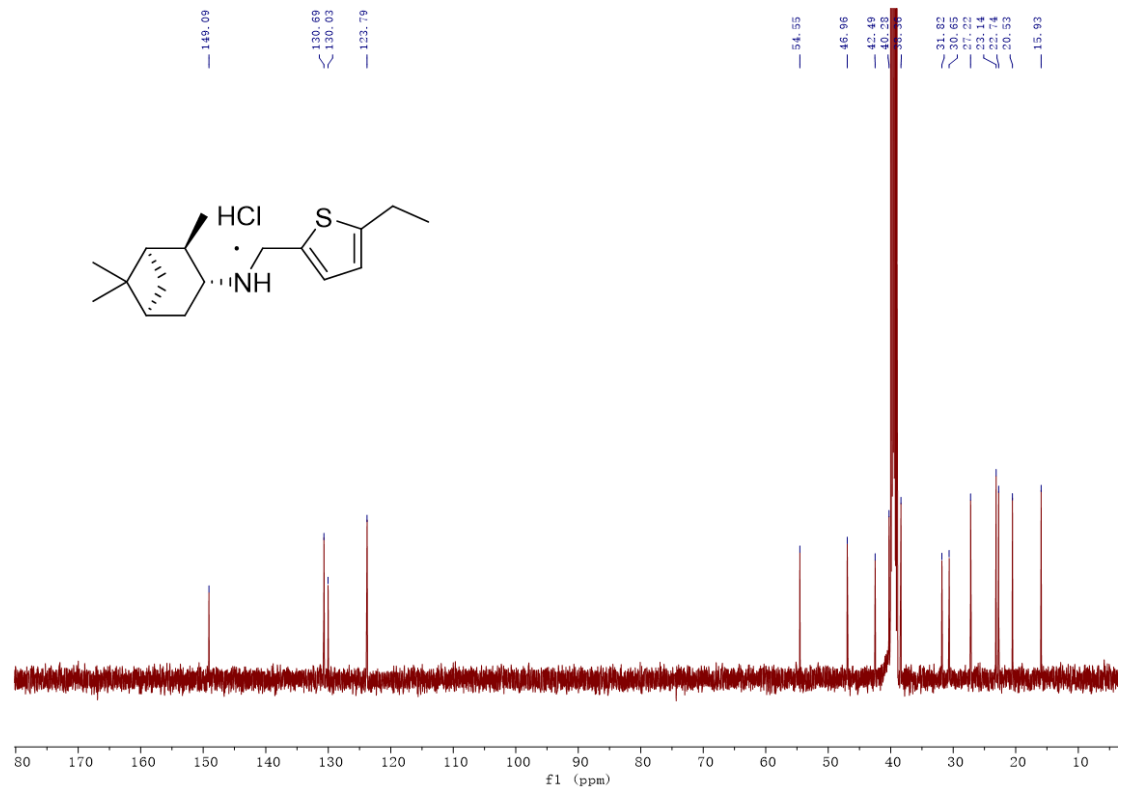

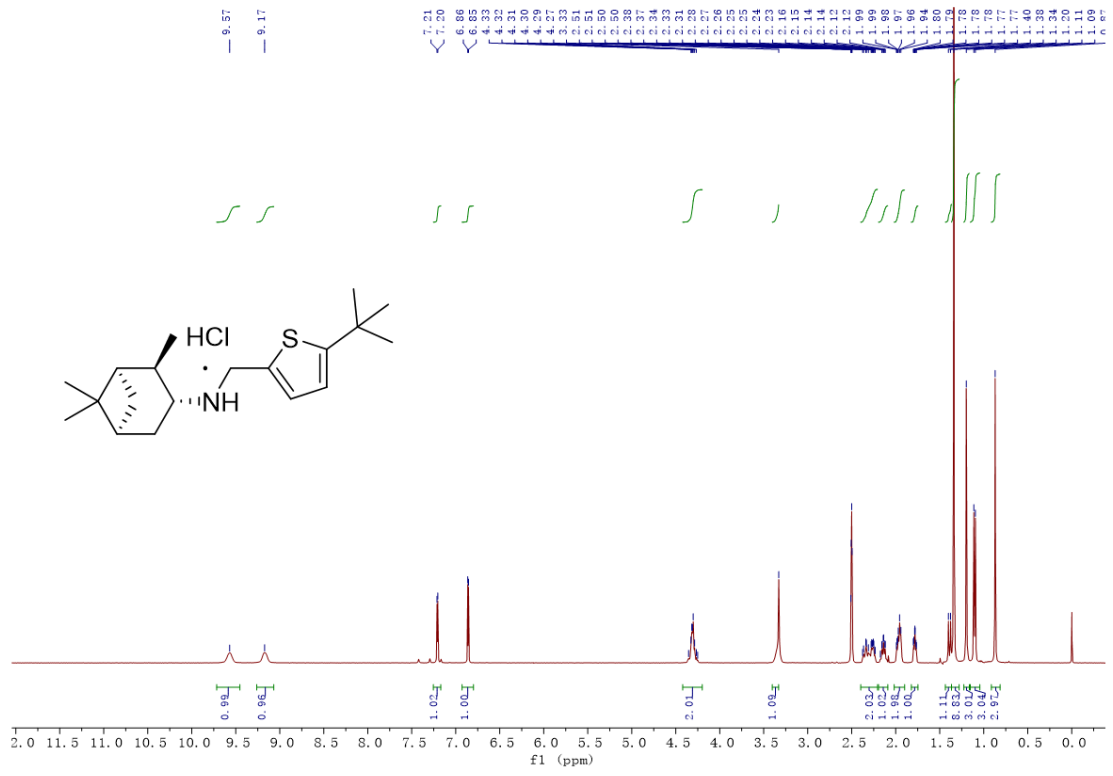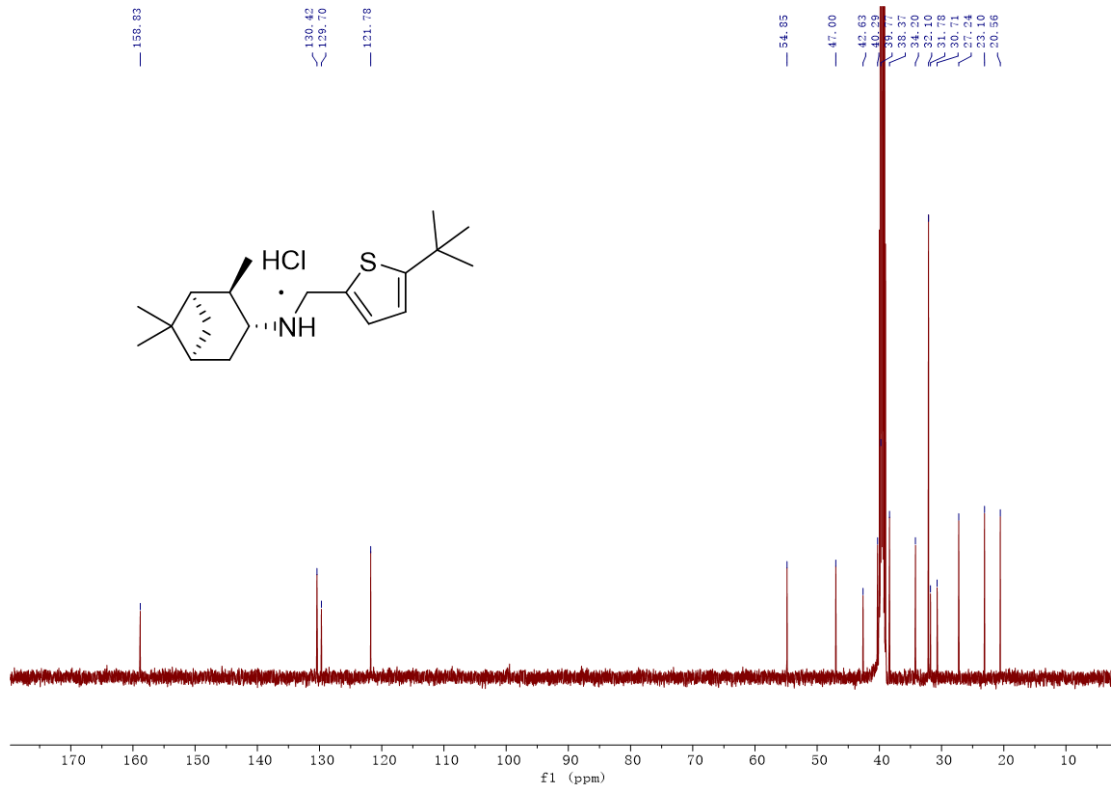

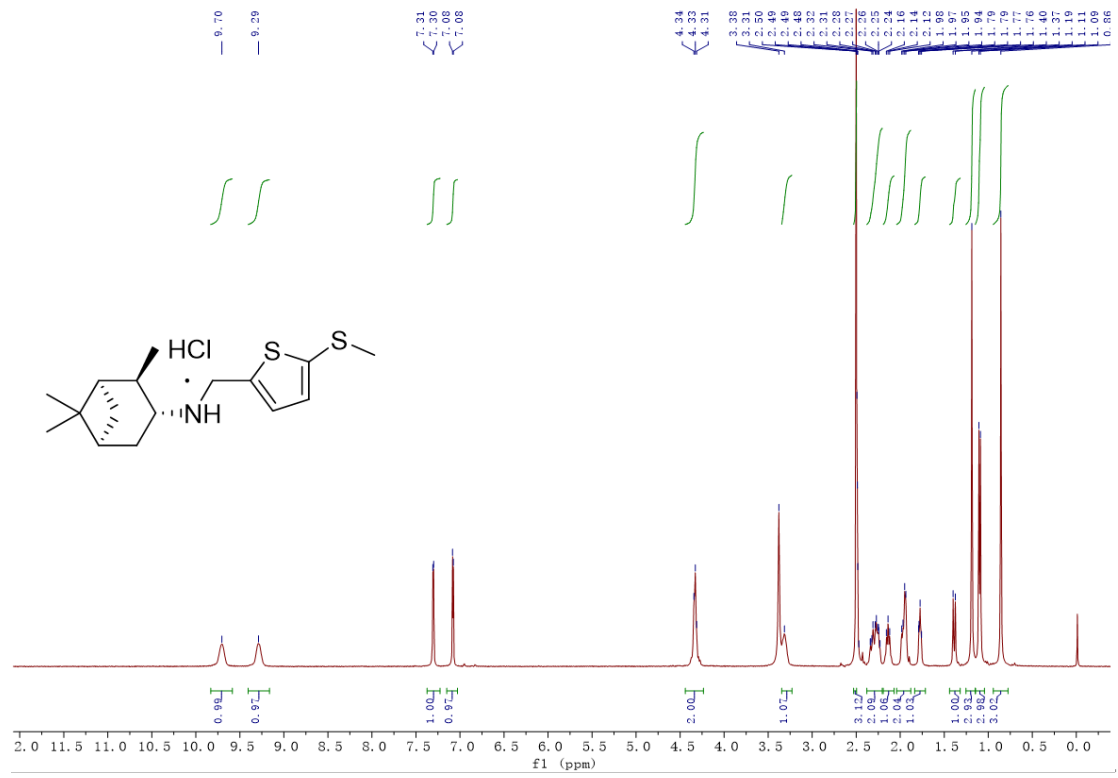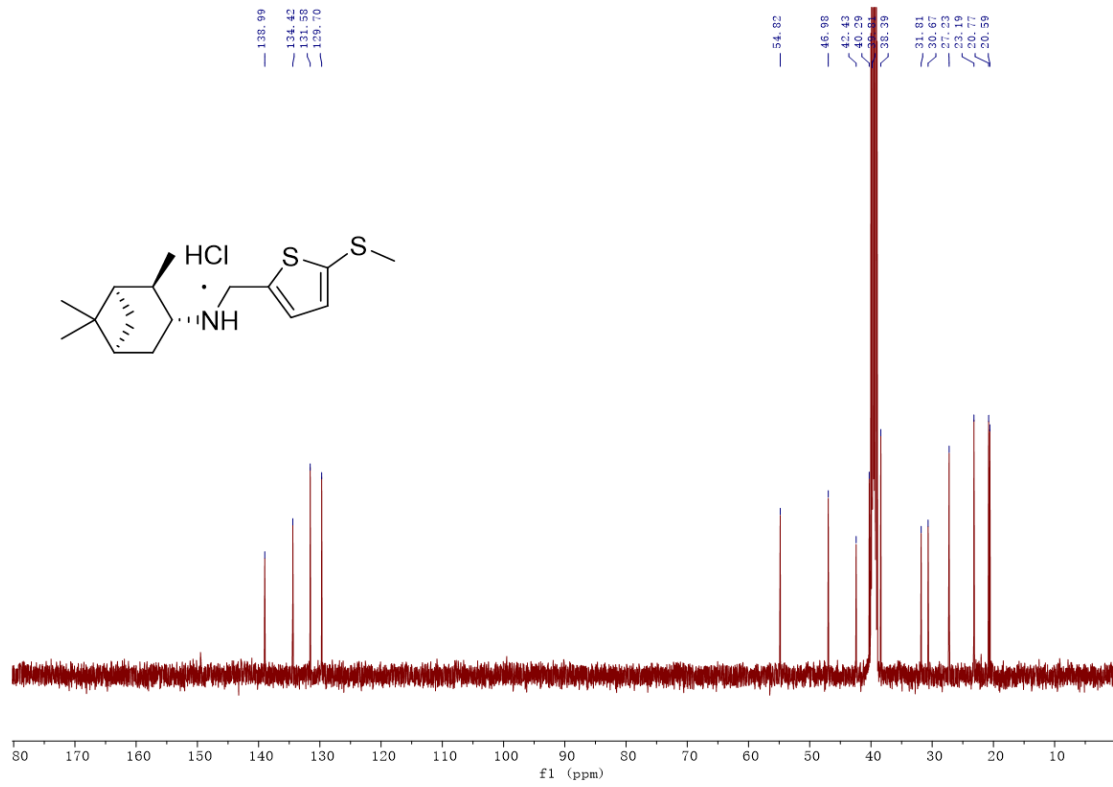

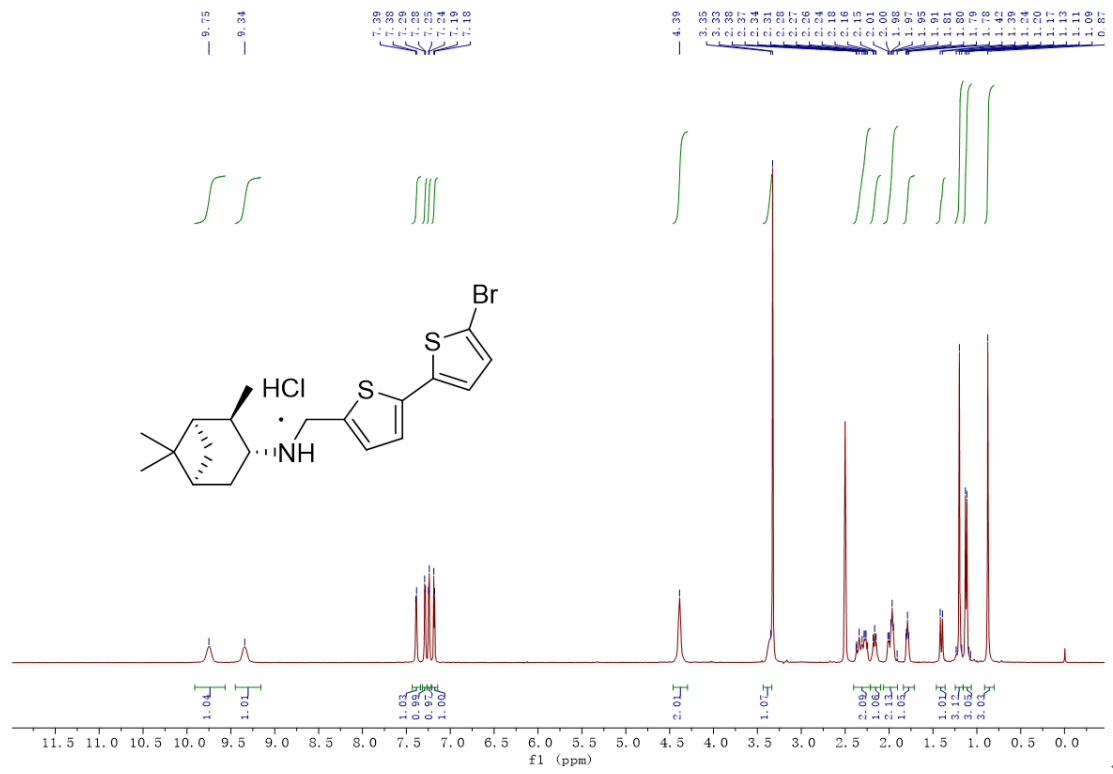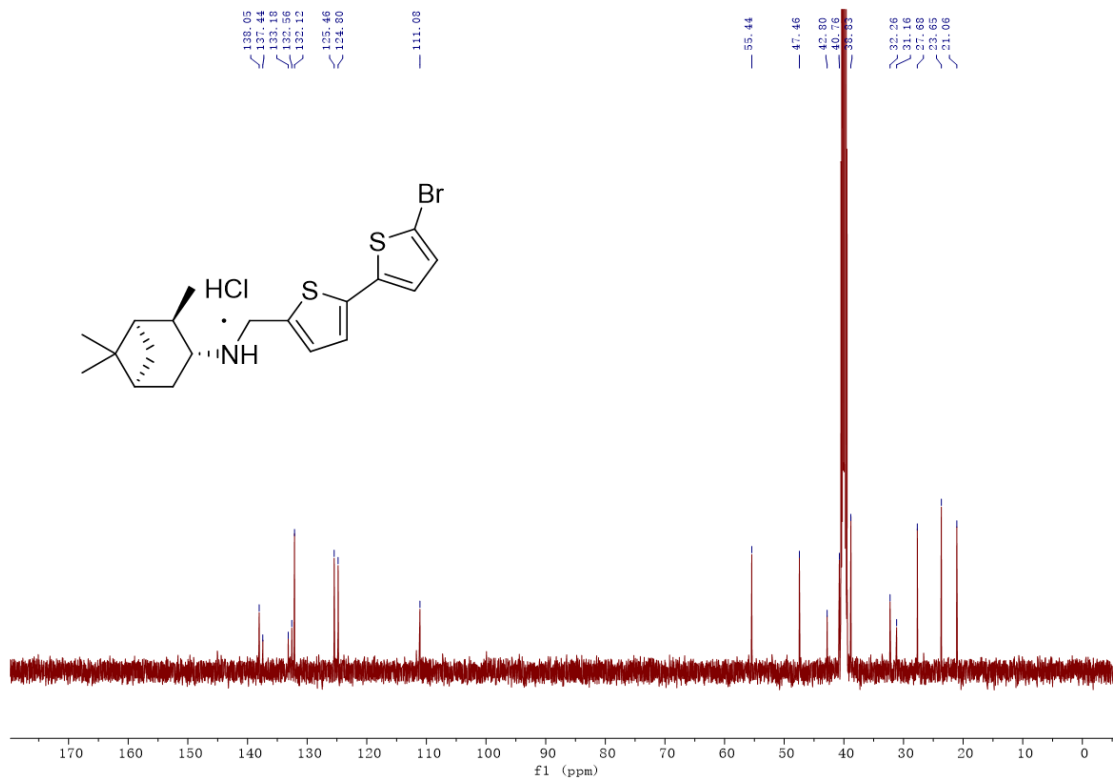

Supplement: NIHMS1017109-supplement-SI.pdf [file NIHMS1017109-supplement-SI.pdf]
